# Supplementary material for: Parents’ vaccination information seeking, satisfaction with and trust in medical providers in Switzerland: a mixed-methods study
Source: PubMed Central journal article supplement — BMJ Open. 2022 Feb 28;12(2):e053267. doi: 10.1136/bmjopen-2021-053267 (PMC8886431; doi:10.1136/bmjopen-2021-053267), 2022-02-28
Supplement: bmjopen-2021-053267.draft_revisions.pdf [file bmjopen-2021-053267.draft_revisions.pdf]

# BMJ Open

BMJ Open is committed to open peer review. As part of this commitment we make the peer review history of every article we publish publicly available.

When an article is published we post the peer reviewers' comments and the authors' responses online. We also post the versions of the paper that were used during peer review. These are the versions that the peer review comments apply to.

The versions of the paper that follow are the versions that were submitted during the peer review process. They are not the versions of record or the final published versions. They should not be cited or distributed as the published version of this manuscript.

BMJ Open is an open access journal and the full, final, typeset and author-corrected version of record of the manuscript is available on our site with no access controls, subscription charges or pay-per-view fees (<http://bmjopen.bmj.com>).

If you have any questions on BMJ Open's open peer review process please email [info.bmjopen@bmj.com](mailto:info.bmjopen@bmj.com)

# BMJ Open

## **“We have so much information that we can get lost in it”: A Mixed-Methods Study on Parents’ Vaccination Information Seeking, Satisfaction with, and Trust in Medical Providers in Switzerland**

|                               |                                                                                                                                                                                                                                                                                                                                                                                                                                                                                                                                                                                                                                                                                                                                             |
|-------------------------------|---------------------------------------------------------------------------------------------------------------------------------------------------------------------------------------------------------------------------------------------------------------------------------------------------------------------------------------------------------------------------------------------------------------------------------------------------------------------------------------------------------------------------------------------------------------------------------------------------------------------------------------------------------------------------------------------------------------------------------------------|
| Journal:                      | <i>BMJ Open</i>                                                                                                                                                                                                                                                                                                                                                                                                                                                                                                                                                                                                                                                                                                                             |
| Manuscript ID                 | bmjopen-2021-053267                                                                                                                                                                                                                                                                                                                                                                                                                                                                                                                                                                                                                                                                                                                         |
| Article Type:                 | Original research                                                                                                                                                                                                                                                                                                                                                                                                                                                                                                                                                                                                                                                                                                                           |
| Date Submitted by the Author: | 01-Jun-2021                                                                                                                                                                                                                                                                                                                                                                                                                                                                                                                                                                                                                                                                                                                                 |
| Complete List of Authors:     | Ebi, Selina; Kantonsspital Baselland Medizinische Universitätsklinik Standort Bruderholz, ; Universität Basel Medizinische Fakultät, Deml, Michael; Swiss TPH, Dept. Epidemiology & Public Health (EPH) Jafflin, Kristen; Swiss Tropical and Public Health Institute; University of Basel<br>Buhl, Andrea; Swiss Tropical and Public Health Institute<br>Engel, Rebecca; University of Basel<br>Picker, Julia; University of Basel<br>Häusler, Julia; University of Basel<br>Wingeier, Bernhard; Klinik Arlesheim AG<br>Krüerke, Daniel; Klinik Arlesheim AG<br>Huber, Benedikt; HFR Fribourg Cantonal Hospital, Department of Pediatrics<br>Merten, Sonja; Swiss Tropical and Public Health Institute, Tarr, Philip ; University of Basel, |
| Keywords:                     | Public health < INFECTIOUS DISEASES, MEDICAL ETHICS, Paediatric infectious disease & immunisation < PAEDIATRICS                                                                                                                                                                                                                                                                                                                                                                                                                                                                                                                                                                                                                             |
|                               |                                                                                                                                                                                                                                                                                                                                                                                                                                                                                                                                                                                                                                                                                                                                             |

SCHOLARONE™  
Manuscripts

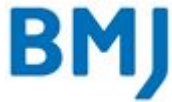

I, the Submitting Author has the right to grant and does grant on behalf of all authors of the Work (as defined in the below author licence), an exclusive licence and/or a non-exclusive licence for contributions from authors who are: i) UK Crown employees; ii) where BMJ has agreed a CC-BY licence shall apply, and/or iii) in accordance with the terms applicable for US Federal Government officers or employees acting as part of their official duties; on a worldwide, perpetual, irrevocable, royalty-free basis to BMJ Publishing Group Ltd ("BMJ") its licensees and where the relevant Journal is co-owned by BMJ to the co-owners of the Journal, to publish the Work in this journal and any other BMJ products and to exploit all rights, as set out in our [licence](#).

The Submitting Author accepts and understands that any supply made under these terms is made by BMJ to the Submitting Author unless you are acting as an employee on behalf of your employer or a postgraduate student of an affiliated institution which is paying any applicable article publishing charge ("APC") for Open Access articles. Where the Submitting Author wishes to make the Work available on an Open Access basis (and intends to pay the relevant APC), the terms of reuse of such Open Access shall be governed by a Creative Commons licence – details of these licences and which [Creative Commons](#) licence will apply to this Work are set out in our licence referred to above.

Other than as permitted in any relevant BMJ Author's Self Archiving Policies, I confirm this Work has not been accepted for publication elsewhere, is not being considered for publication elsewhere and does not duplicate material already published. I confirm all authors consent to publication of this Work and authorise the granting of this licence.

1  
2  
3 1 **“We have so much information that we can get lost in it”: A Mixed-Methods Study on**  
4 2 **Parents’ Vaccination Information Seeking, Satisfaction with, and Trust in Medical**  
5 3 **Providers in Switzerland**  
6 4  
7 5  
8 6

9 6 **Authors:** Selina Ebi<sup>1,2</sup> \* (physician; ebi.selina@gmail.com) , Michael J. Deml<sup>3,2</sup> \*(scientific  
10 7 collaborator; michaeljdeml@gmail.com), Kristen Jafflin<sup>3,2</sup> (scientific collaborator;  
11 8 kristen.jafflin@swisstph.ch), Andrea Buhl<sup>3,2</sup> (scientific collaborator; andrea.buhl@unibas.ch),  
12 9 Rebecca Engel<sup>1,2</sup> (medical student; rebecca.engel@stud.unibas.ch), Julia Picker<sup>1,2</sup> (medical  
13 10 student; julia.picker@stud.unibas.ch), Julia Häusler<sup>1,2</sup> (medical student;  
14 11 julia.haeusler@stud.unibas.ch), Bernhard Wingeier<sup>4</sup> (head physician;  
15 12 bernhard.wingeier@klinik-arlesheim.ch), Daniel Krüerke<sup>4</sup> (scientific collaborator;  
16 13 daniel.krueerke@klinik-arlesheim.ch), Benedikt M. Huber<sup>5</sup> (senior physician/pediatrician;  
17 14 benedikt.huber@h-fr.ch), Sonja Merten<sup>3,2</sup> (physician/epidemiologist;  
18 15 sonja.merten@swisstph.ch), Philip E. Tarr<sup>1,2</sup> (head physician; philip.tarr@unibas.ch)  
19 16  
20 17

21 17 \* Equal contribution  
22 18

23 19 **Correspondence:** Prof. Dr. med. Philip E. Tarr, National Research Program NFP74 Vaccine  
24 20 Hesitancy, University Dept. of Medicine, Kantonsspital Baselland, University of Basel, 4101  
25 21 Bruderholz, Switzerland, [philip.tarr@unibas.ch](mailto:philip.tarr@unibas.ch), phone +41 (61) 436 2212, fax +41 (61) 436  
26 22 3670  
27 23  
28 24

29 24 **Author Affiliations:**

- 30 25 1. University Department of Medicine, Kantonsspital Baselland, 4101 Bruderholz,  
31 26 Switzerland  
32 27 2. University of Basel, Petersplatz 1, 4051 Basel, Switzerland  
33 28 3. Swiss Tropical and Public Health Institute, Socinstrasse 57, 4051 Basel, Switzerland  
34 29 4. Clinic Arlesheim, Pfeffingerweg 1, 4144 Arlesheim, Switzerland  
35 30 5. Department of Pediatrics, HFR Fribourg Cantonal Hospital, Fribourg, Switzerland  
36 31

37 32 Word count: 4648 (without strengths and weaknesses), 4744 (with strengths and weaknesses)  
38 33

39 34 **Abbreviations:** Complementary and alternative medicine (CAM); Vaccine hesitancy (VH);  
40 35 Parent Attitudes about Childhood Vaccines (PACV).  
41 36

42 37 **Keywords**

43 38 Vaccine Hesitancy; Information Sources; Provider; Satisfaction; Trust  
44 39

45 40 What is already known on this topic:

46 41 Medical providers, personal networks and the Internet are trusted vaccination information  
47 42 sources and have large influences on parents’ vaccination decisions.  
48 43

49 44 What this study adds:

50 45 In Switzerland, where complementary and alternative medicine (CAM) is popular, little  
51 46 research has examined parents’ vaccination decision-making process. Our findings suggest  
52 47 that VH parents seek out a variety of information sources and providers due to dissatisfaction  
53 48 with and distrust in previously obtained information. Since doctors are parents’ most trusted  
54 49 source of vaccination information, it is important for doctors to create trusting environments  
55 50 where parents’ vaccination questions and concerns are taken seriously and can be met with  
56 51 satisfaction.

## 52 **Abstract**

### 53 Objectives

54 The aim of this study was to better understand parents' information seeking behaviors,  
55 information sources, and interactions with their providers regarding childhood vaccines.

### 56 Setting

57 The study was part of a Swiss national research program investigating vaccine hesitancy and  
58 underimmunization.

### 59 Participants

60 We conducted qualitative interviews with 37 providers and 30 parents and observed 34  
61 vaccination consultations. We then conducted quantitative surveys with 130 providers (both  
62 CAM- and biomedically oriented) and 1390 parents.

### 63 Main outcome measures

64 We focused on participants' vaccination information sources used in their decision-making  
65 process, as well as parents' trust in and satisfaction with these source and providers.

### 66 Results

67 Based on the Parent Attitudes about Childhood Vaccines (PACV) scale, we considered 889  
68 parents as non-vaccine-hesitant (non-VH) and 501 parents as vaccine-hesitant (VH). Whereas  
69 both groups cited providers as the most trusted source of information, non-VH-parents were  
70 more likely to cite pediatricians (N=755[85%] vs N=358[71%]) and public health authorities  
71 (N=333[37%] vs. N=101[20%]) than VH-parents. VH-parents were more likely to have  
72 consulted another provider (N=196[39%] vs. N=173[19%]) than non-VH-parents, to express  
73 less satisfaction with both their primary (N=342[82%] vs. N=586[91%]) and other providers  
74 (N=82[42%] vs. N=142[82%]), and less trust in their primary (N=368[88%] vs. N=632[98%])  
75 and other providers (N=108[55%] vs. N=146[84%]). VH-parents were less likely to be  
76 satisfied with their biomedical primary provider than non-VH-parents (100[69%] vs.  
77 467[91%]). However, when the primary provider was CAM-oriented, there were similar

78 levels of satisfaction among both groups (237[89%] VH-parents vs. 118[89%] non-VH-  
79 parents). All differences were significant ( $p<0.05$ ).

## 80 Conclusions

81 Pediatricians were parents' most trusted information source. VH-parents were more likely to  
82 turn to additional sources and less likely to be satisfied with their providers. (Dis)satisfaction  
83 and (dis)trust played significant roles in parents' vaccination decision-making.

## 84 Registry

85 The local ethics committee (Ethikkommission Nordwest- und Zentralschweiz, EKNZ; project  
86 ID number 2017– 00725) approved the study.

## 87 Strengths and weaknesses of the study

| Strengths                                                                                                                                                                                                                                           | Limitations                                                                       |
|-----------------------------------------------------------------------------------------------------------------------------------------------------------------------------------------------------------------------------------------------------|-----------------------------------------------------------------------------------|
| The mixed-methods study design brought added value to our study, as we could address qualitatively documented phenomena and then systematically analyze them on a larger scale.                                                                     | The quantitative survey was not administered to a random sample.                  |
| Our recruitment strategy explicitly oversampled CAM providers and parents consulting them, which allowed us to compare the patient-provider relationship and patient-provider vaccine perspectives for parents seeing CAM vs. biomedical providers. | Our provider sample was recruited through personal contacts and snowball sampling |
| We consider the transdisciplinary research to be a distinct advantage [1].                                                                                                                                                                          |                                                                                   |

88

## 89 1. Introduction

90 The growing body of literature on vaccine hesitancy (VH) points to the multifaceted and  
91 complex nature of vaccination decision-making [2, 3]. Most parents – whether vaccine-  
92 accepting or VH – obtain their vaccine information primarily from healthcare professionals,  
93 with the most commonly cited source being pediatricians, followed by other healthcare  
94 professionals, such as midwives, nurses, and other therapists [4, 5, 6]. As healthcare providers  
95 are the main source of information for parental decision-making, issues around satisfaction

1  
2  
3 96 with and trust in the provider are likely to be important. Previous research has shown how  
4  
5 97 trusting relationships between patients and providers are determinative in parents' vaccination  
6  
7 98 decision-making, meaning that parents who trust their providers tend to trust their vaccination  
8  
9  
10 99 recommendations [7, 8, 9]. In Switzerland, *complementary and alternative medicine (CAM)*  
11  
12 100 is widely used and integrated into the healthcare system [10, 11]. Particularly in primary  
13  
14 101 healthcare for children, CAM is mainly provided by biomedically trained physicians with  
15  
16 102 additional CAM training in the sense of integrative medicine [12]. Researchers have  
17  
18 103 established associations between VH and CAM use [7, 13, 14], and even suggested that CAM  
19  
20 104 providers and VH parents have a "symbiotic" relationship, meaning that "VH and CAM exist  
21  
22 105 and function separately, but when combined, provide each other with 'resources' that enable  
23  
24 106 them to thrive together" [13, p. 111]. Others have shown that VH individuals have lower  
25  
26 107 levels of trust in biomedicine than in CAM [13, 15].

27  
28  
29  
30 108 In addition to medical providers, sources of vaccination information include parents'  
31  
32 109 social networks, with similar views and norms being shared within networks. Generally,  
33  
34 110 parents with people in their networks who vaccinate less are also less likely to vaccinate [16,  
35  
36 111 17]. Social media and the Internet offer platforms for the dissemination of information and  
37  
38 112 thus serve as popular vaccination information sources [18, 19]. Testimonies of (negative)  
39  
40 113 experiences during and after vaccination or the usage of forums are believed to be particularly  
41  
42 114 appealing to parents seeking vaccination information [20, 21]. In terms of vaccination  
43  
44 115 information and advice seeking, the Internet, especially social media platforms, has its own  
45  
46 116 complexities and dynamics that are the subject of intense study and research [22]. In the last  
47  
48 117 two decades, patient-provider dynamics have partially changed from the former *doctor-*  
49  
50 118 *provides-patient* to today's *users-provide-users* (i.e., patients no longer obtain their  
51  
52 119 information only from the doctors who treat them, but doctors as well as lay people frequently  
53  
54 120 disseminate information about health and illness on the Internet, which is available to all other  
55  
56 121 users), with health-information seeking audiences being potentially far larger, and everyone

1  
2  
3 122 with Internet access being capable of disseminating information [20, 23]. This context is  
4  
5 123 further complicated with negative, emotion-focused, and often untrue vaccination information  
6  
7 124 being difficult to debunk with medical facts [21].  
8  
9

10 125 A commonly cited explanation for VH, both in scientific and public discourses, is based  
11  
12 126 on the *knowledge deficit model*, which implies that VH individuals lack the necessary  
13  
14 127 information to make the “rational choice”, which, from public health and biomedical  
15  
16 128 perspectives, would be to vaccinate [24]. Some researchers, finding support in the knowledge  
17  
18 129 deficit model, have turned to considerations of *health literacy*, which “[...] entails people’s  
19  
20 130 knowledge, motivation and competences to access, understand, appraise, and apply health  
21  
22 131 information in order to make judgements and take decisions [...]” [25, p. 1473]. Proponents  
23  
24 132 of this concept point out that greater health literacy generally correlates with better self-  
25  
26 133 reported health [26, 27]. Other researchers have called into question the presumption that VH  
27  
28 134 can be explained by the knowledge deficit and health literacy models [28] and therefore the  
29  
30 135 usefulness of education-only approaches to address VH, but rather suggested to address the  
31  
32 136 personal and emotional level of the parents and discuss their experiences with vaccinations.  
33  
34 137 [28, 29].  
35  
36  
37  
38  
39

40 138 In this mixed-methods study, we studied how non-VH and VH parents seek information  
41  
42 139 about vaccination and what information sources they rely on. Our results show how the  
43  
44 140 parental decision-making process is driven by understandings of vaccination information and  
45  
46 141 by (dis)satisfaction with and (dis)trust in vaccination information sources.  
47  
48  
49  
50

51 142

## 52 143 **2. Material and methods**

### 53 144 *2.1. Study design and population*

54  
55 145 This study is part of a national transdisciplinary investigation into vaccination decision-  
56  
57 146 making in Switzerland [30]. We employed a mixed-methods approach with *sequential*  
58  
59 147 *exploratory design*, meaning that an initial qualitative component informed the design of a  
60



1  
2  
3 148 subsequent quantitative stage [31]. First, we analyzed the qualitative results by identifying  
4  
5 149 key areas that seemed to be of central importance. We then focused on these when compiling  
6  
7  
8 150 the quantitative questionnaires. The detailed analysis of qualitative and quantitative results  
9  
10 151 was finally done in parallel by presenting a clustering of similar statements in the qualitative  
11  
12 152 sector, followed by quantitative results showing similar dynamics on a larger scale. We  
13  
14 153 interviewed parents throughout German, French and Italian-speaking Switzerland. At the time  
15  
16  
17 154 of the survey, the interviewed parent was  $\geq 18$  years of age and their child was 0-11 years old.  
18  
19 155 We asked parents to provide us with a copy of their children's vaccination record.  
20

## 21 156 *2.2. Patient and public Involvement*

22  
23  
24 157 Given the presumably large number of people who are not to be regarded as vaccine  
25  
26 158 opponents but as vaccine hesitant, we meant to employ a specific focus on the path to  
27  
28 159 decision-making with all the thought processes, worries and fears contained therein, as well as  
29  
30 160 the influence of external information. During our qualitative research period, various starting  
31  
32  
33 161 points emerged that were worth investigating on a larger scale (in the quantitative sector). We  
34  
35 162 recruited participating parents from a network of 86 biomedical and 44 CAM providers  
36  
37 163 participating in the project. Participants who indicated they wished to receive the study results  
38  
39 164 will receive notifications once results are published.  
40

## 41 165 *2.3. Qualitative data collection and analysis*

42  
43  
44 166 We first conducted semi-structured in-depth interviews with parents from September 2017  
45  
46 167 to February 2018 and with biomedically-only trained doctors and providers (i.e., physicians or  
47  
48 168 non-physician-providers) with additional CAM training from August 2017 to September  
49  
50 169 2018. Interviews aimed to better understand parents' vaccination decision-making processes  
51  
52 170 and their interactions with health care providers. An interview guide was piloted and revisited  
53  
54 171 iteratively for clarity. We also conducted ethnographic observations of vaccination  
55  
56 172 consultations. Qualitative interviews were audio-recorded and transcribed verbatim.  
57  
58  
59 173 Interviews allowed us to gather background information about parents and their providers and  
60

1  
2  
3 174 perspectives on vaccination. Vaccination consultation observations were documented in field  
4  
5 175 journals and then subsequently written into narrative accounts. Qualitative data were analyzed  
6  
7  
8 176 by AUTHOR2 and AUTHOR4. Analysis of the qualitative interviews and observations were  
9  
10 177 guided by the Framework Method [32] with support of MAXQDA software.

#### 12 178 2.4. Quantitative data collection and analysis

14 179 For the study's quantitative component, we recruited parents in participating providers'  
15  
16  
17 180 offices. We refer to these providers as the "primary" providers. We administered a  
18  
19 181 questionnaire to study participants which included the *Parent Attitudes about Childhood*  
20  
21 182 *Vaccines (PACV)* survey instrument, a validated instrument that was designed by Opel and  
22  
23 183 colleagues in order to identify VH parents [33, 34, 35]. The 2011 Opel-revised 15-item PACV  
24  
25 184 [34] results in a score of 0-100 points. If a parent scores  $\leq 49$  points, they are considered non-  
26  
27 185 VH; if they score  $\geq 50$  points, they are considered VH. Based upon the results of a study  
28  
29 186 validating a 5-item version of the PACV in Switzerland with identical scoring [36], we opted  
30  
31 187 for the shorter 5-item version for our analyses. The final questionnaire included PACV items,  
32  
33 188 questions gathering sociodemographic information about the parents and the target child, and  
34  
35 189 additional questions informed by our qualitative research, including questions on the parent-  
36  
37 190 provider relationship and vaccination information sources. Surveys were conducted by  
38  
39 191 telephone from January 2019 to April 2020 [30].

41  
42 192 A key question posed to parents was "What are your most trusted information sources on  
43  
44 193 vaccination?" in which we offered a series of pre-established response options (e.g.,  
45  
46 194 "Internet") and prompted participants to provide additional information through open-answer  
47  
48 195 responses by asking about certain types of sources (e.g., "What websites?"). The number of  
49  
50 196 sources mentioned by each participant was analyzed by coding and counting the reported  
51  
52 197 sources, as well as the free-text answers.

53  
54 198 We use descriptive statistics plus Pearson's Chi-squared and Wilcoxon Rank Sum tests to  
55  
56 199 test whether observed differences between non-VH and VH parent participants are significant

1  
2  
3 200 at the  $p < 0.05$  level. Quantitative data analysis was performed by AUTHOR1 and AUTHOR3  
4  
5 201 using STATA software version 12.1 (Stata corporation, College Station TX). We personally  
6  
7 202 read and reviewed the information sources cited by parents and, after consultation within the  
8  
9 203 team, we decided to consider each source as critical or accepting of the official vaccination  
10  
11 204 recommendations.

### 14 205 *2.5. Ethical considerations*

16 206 This study was conducted in compliance with the Swiss Federal Act on Research  
17  
18 207 Involving Human Beings (Human Research Act) and the Declaration of Helsinki. The local  
19  
20 208 ethics committee (Ethikkommission Nordwest- und Zentralschweiz, EKNZ; project ID  
21  
22 209 number 2017– 00725) approved the study. We obtained written informed consent from each  
23  
24 210 participant after the nature and possible consequences of the study had been fully explained.  
25  
26 211 Pseudonyms are used for participants throughout. Direct quotes were translated from the  
27  
28 212 original language of utterance (German, French) into English.  
29  
30  
31  
32

33 213

## 35 214 **3. Results**

### 37 215 *3.1. Study population*

39 216 For the qualitative study component, we conducted ethnographic observations of 34  
40  
41 217 pediatric vaccination consultations. We also conducted in-depth, face-to-face interviews with  
42  
43 218 30 parents and 37 providers. Among the provider-interviewees, 20 were biomedically  
44  
45 219 oriented physicians and 17 were CAM-oriented providers, of which 15 were biomedically  
46  
47 220 trained physicians with additional training in CAM, and 2 were non-physician CAM  
48  
49 221 providers.  
50  
51  
52

53 222 For the quantitative study component, we conducted telephone interviews with 1390  
54  
55 223 parents as well as 86 biomedically- and 44 CAM-oriented primary providers. 889 (64%)  
56  
57 224 parents had a PACV score of  $\leq 49$ , indicating non-VH, and 501 (36%) parents had a PACV  
58  
59 225 score of  $\geq 50$ , indicating VH. Parent characteristics are shown in **Table 1**. VH parents were  
60

226 more likely to see a CAM-oriented primary provider than non-VH parents (307 [61%] vs. 183  
227 [21%];  $p < 0.001$ ).

**Table 1.** Characteristics of the quantitative study population

|                              | All parents<br>(N=1390) |  | By PACV-score             |                       | P value             |
|------------------------------|-------------------------|--|---------------------------|-----------------------|---------------------|
|                              | N (%)                   |  | Non-VH parents<br>(N=889) | VH parents<br>(N=501) |                     |
| Female Respondent            | 1232 (89%)              |  | 798 (90)                  | 434 (87)              | 0.141 <sup>1</sup>  |
| Relationship to child        |                         |  |                           |                       | 0.095 <sup>1</sup>  |
| Mother                       | 1228 (88)               |  | 797 (90)                  | 431 (86)              |                     |
| Father                       | 155 (11)                |  | 89 (10)                   | 66 (13)               |                     |
| Other                        | 7 (1)                   |  | 3 (0)                     | 4 (1)                 |                     |
| Interviewee Age (Mean (SD))  | 37.1 (6.27)             |  | 37 (6.16)                 | 37.2 (6.46)           | 0.592 <sup>2</sup>  |
| Born in Switzerland          | 981 (71)                |  | 608 (68)                  | 373 (74)              | 0.059 <sup>1</sup>  |
| Parent's highest education   |                         |  |                           |                       | <0.001 <sup>1</sup> |
| Low <sup>3</sup>             | 272 (20)                |  | 188 (21)                  | 84 (17)               |                     |
| Medium <sup>4</sup>          | 321 (23)                |  | 209 (24)                  | 112 (22)              |                     |
| Bachelors <sup>5</sup>       | 285 (21)                |  | 163 (18)                  | 122 (24)              |                     |
| Masters                      | 358 (26)                |  | 226 (25)                  | 132 (26)              |                     |
| Doctorate                    | 105 (8)                 |  | 81 (9)                    | 24 (5)                |                     |
| Other, missing               | 49 (4)                  |  | 22 (2)                    | 27 (5)                |                     |
| Household income             |                         |  |                           |                       | <0.001 <sup>1</sup> |
| < 80,000 Swiss Francs (CHF)  | 319 (23)                |  | 174 (20)                  | 145 (29)              |                     |
| 80,000 – 120,000 CHF         | 384 (28)                |  | 225 (25)                  | 159 (32)              |                     |
| > 120,000 CHF                | 279 (20)                |  | 195 (22)                  | 84 (17)               |                     |
| Missing, declined to respond | 408 (29)                |  | 295 (33)                  | 113 (23)              |                     |
| Type of primary provider     |                         |  |                           |                       | <0.001 <sup>1</sup> |
| Biomedical                   | 893 (64)                |  | 705 (79)                  | 188 (38)              |                     |
| CAM                          | 490 (35)                |  | 183 (21)                  | 307 (61)              |                     |
| Missing                      | 7 (1)                   |  | 1 (0)                     | 6 (1)                 |                     |

**Note.** <sup>1</sup>Pearson's Chi-squared and <sup>2</sup>Wilcoxon Rank Sum tests were used for statistical analysis. <sup>3</sup>Secondary school not completed, no completed professional education, completed 9 years of school without further education, apprenticeship, technical school or business school; <sup>4</sup>College, higher professional school; <sup>5</sup>Bachelor at University, primary school teacher seminar.

228

### 229 3.1 Variety of information sources on vaccination

230 During our qualitative interviews and observations of vaccination consultations, parents  
231 cited a broad array of vaccination information sources as part of their decision-making  
232 process. Many VH parents engaged in what we refer to as *information shopping*, which  
233 involves comparing and weighing different information sources in an attempt to reach  
234 certainty about the right vaccination decision to make for their children. For example, Mrs.  
235 Sandoz, a 35-year-old mother of a 13-month-old unvaccinated son explained her decision not  
236 to vaccinate (Pseudonyms are used for participants):

237 “I think it was a mix of discussions with people close to us and with friends. [...]

238 There is my personal feeling about the matter. There is certainly the social influence

1  
2  
3 239 from my husband. I'll say that the decision surely came more from me than it did from  
4  
5 240 him. I think I hold the decision closer to my heart than he does. I think it was kind of a  
6  
7  
8 241 vague questioning. There were some things I read on the Internet. I joined Facebook  
9  
10 242 groups where they talk about it. I read some testimonies. I think when I was pregnant,  
11  
12 243 I had a discussion with the [CAM] pediatrician in order to know the true risks that we  
13  
14 244 were taking if we didn't vaccinate. I was looking for the most neutral point of view  
15  
16  
17 245 possible. [...] For now, it's a decision that is in favor of not vaccinating.”

18  
19 246 Other VH parents explained how having multiple sources of information reassured them  
20  
21 247 that they were taking the correct course of action for their families. The following example  
22  
23  
24 248 from Mr. and Mrs. Schmied, the parents of a 6-month-old unvaccinated baby demonstrates  
25  
26 249 this idea (Pseudonyms are used for participants):

27  
28 250 *Mrs. Schmied:* We also talked about [vaccination] with a friend who is a doctor. He  
29  
30 251 gave us – really sweet – a little PowerPoint presentation at home.

31  
32  
33 252 *Mr. Schmied:* We were there for two hours. [...]

34  
35 253 *Mrs. Schmied:* Really nice. He really took his time and explained every single  
36  
37 254 vaccination to us again: What it is for? What it is not for? [...] What side effects there  
38  
39  
40 255 can be? [...] That was again very helpful [for decision-making]. [...]

41  
42 256 *Mr. Schmied:* Then we cancelled [the vaccination appointment] five minutes before.

43  
44 257 [...]

45  
46  
47 258 *Mrs. Schmied:* Because I realized, “No, we can't really stand behind [the decision of  
48  
49 259 vaccinating our child].” Then we actually cancelled [the appointment] and haven't  
50  
51 260 made a new one since then.

52  
53  
54 261 *Mr. Schmied:* Yes. But at least we now know, what we...

55  
56 262 *Mrs. Schmied:* What we want.

57  
58 263 Qualitative results additionally shed light on parents, often VH parents, having consulted a  
59  
60 264 multitude of sources that varied in both format and content. Parents described how each piece

1  
2  
3 265 of information could temporarily solidify their opinion, but also raise further doubts and  
4  
5 266 uncertainties. Mrs. Sandoz explained (Pseudonyms are used for participants):

6  
7 267 “We have a lot of doubts around the benefits of vaccines. My husband and I are still  
8  
9 268 reading about it and continue to have discussions and thinking about it in order to be  
10  
11 269 comfortable. But we’re not sure that the benefits are large enough, compared to what  
12  
13 270 vaccines contain. [...] For us, in the society we live in, we don’t have the impression  
14  
15 271 that the risk is sufficient enough, for now, to vaccinate our son. [...] And finding the  
16  
17 272 right information is difficult, which is probably linked to our information society. We  
18  
19 273 have so much information that we can get lost in it. [...] Up until now, everything that  
20  
21 274 I’ve read and the discussions that I’ve had have reinforced our decision to not  
22  
23 275 vaccinate our son.”

24  
25 276 These observations support information seeking as an important characteristic of VH  
26  
27 277 parents and stand in contrast to the underlying assumptions of the knowledge deficit model  
28  
29 278 that VH persons make vaccination decisions based on a lack of information. VH parents  
30  
31 279 described how a multitude of information sources could be both a source of reassurance and  
32  
33 280 of hesitancy in their quest for neutral information about vaccination. We therefore  
34  
35 281 investigated the potential association of VH with the number and trustworthiness of parents’  
36  
37 282 vaccination information sources by including the question “What are your most trusted  
38  
39 283 information sources on vaccination?” in the quantitative questionnaire.

40  
41 284 **Figure 1** illustrates how the number of trusted information sources varies between non-  
42  
43 285 VH and VH parents. VH parents reported using more sources on average than non-VH  
44  
45 286 parents (2.98 [SD=2.02] vs. 2.70 [SD=1.83]). While small, the difference was significant  
46  
47 287 (p=0.012).

48  
49 288

50  
51 289 **[Figure 1]**

52  
53 290

### 291 3.2 Types of information sources and media

292 Based on our initial qualitative research, we generated a preliminary list of information  
 293 source types which we then included in the quantitative questionnaire. Commonly mentioned  
 294 information sources included the child's doctor and other providers, family, friends and  
 295 acquaintances, official public health recommendations, print media, such as books or  
 296 newspaper articles, the Internet, and social media.

297 In **Table 2** we list the trusted vaccination information sources cited most by parents. The  
 298 child's doctor was the information source cited most (1113 [80%] parents) by both non-VH  
 299 and VH parents, but non-VH parents were more likely to report the child's doctor as the most  
 300 trusted source than VH parents (755 [85%] vs. 358 [71%];  $p < 0.001$ ). Non-VH parents were  
 301 also more likely to report public health authorities as a trusted information source than VH  
 302 parents (333 [37%] vs. 101 [20%];  $p < 0.001$ ), as well as information materials that are  
 303 consistent with the official vaccination recommendation (74 [8%] vs. 26 [5%];  $p = 0.03$ ).

304 In contrast, VH parents tended to mention information sources other than the child's  
 305 doctor or public health authorities more than non-VH parents, including social networks (215  
 306 [43%] vs. 253 [28%];  $p < 0.001$ ), other health care workers (105 [21%] vs. 119 [13%];  
 307  $p < 0.001$ ) and their personal gut feelings or experiences (16 [3%] vs. 10 [1%];  $p = 0.006$ ). The  
 308 largest difference we identified involved information materials, such as books, online or print  
 309 magazines, and websites that are critical of official vaccination recommendations (105 VH  
 310 parents [21%] vs. 4 non-VH parents [0%];  $p < 0.001$ ), and materials of obvious CAM nature  
 311 (12 VH parents [2%] vs. 0 non-VH parents [0%];  $p < 0.001$ ).

**Table 2.** Types of trusted vaccination information sources.

|                              | All parents<br>(N=1390) |      | By PACV-score             |                       | P value |      |        |
|------------------------------|-------------------------|------|---------------------------|-----------------------|---------|------|--------|
|                              |                         |      | Non-VH parents<br>(N=889) | VH parents<br>(N=501) |         |      |        |
|                              | N                       | (%)  | N                         | (%)                   |         |      |        |
| My child's doctor            | 1113                    | (80) | 755                       | (85)                  | 358     | (71) | <0.001 |
| Social networks <sup>1</sup> | 468                     | (34) | 253                       | (28)                  | 215     | (43) | <0.001 |
| Public Health Authorities    | 434                     | (31) | 333                       | (37)                  | 101     | (20) | <0.001 |
| Other health care workers    | 224                     | (16) | 119                       | (13)                  | 105     | (21) | <0.001 |
| Other physician              | 195                     | (14) | 111                       | (12)                  | 84      | (17) | 0.027  |
| CAM                          | 19                      | (1)  | 3                         | (0)                   | 16      | (3)  | <0.001 |

|                                                                                          |         |        |          |        |
|------------------------------------------------------------------------------------------|---------|--------|----------|--------|
| Homeopathic                                                                              | 12 (1)  | 2 (0)  | 10 (2)   | 0.001  |
| Midwife                                                                                  | 13 (1)  | 4 (0)  | 9 (2)    | 0.268  |
| Materials that are critical of public health vaccination recommendation <sup>2</sup>     | 109 (8) | 4 (0)  | 105 (21) | <0.001 |
| “Foundation for consumer protection”                                                     | 22 (2)  | 3 (0)  | 19 (4)   | <0.001 |
| Hirte: “Impfen Pro & Contra”                                                             | 15 (1)  | 0 (0)  | 15 (3)   | <0.001 |
| Explicitly CAM materials                                                                 | 12 (1)  | 0 (0)  | 12 (2)   | <0.001 |
| Berthoud: “Qui aime bien vaccine peu”                                                    | 9 (1)   | 0 (0)  | 9 (2)    | <0.001 |
| Glöckler/Goebel/Michael: “Kindersprechstunde”                                            | 6 (0)   | 0 (0)  | 6 (1)    | 0.001  |
| “www.impfo.ch”                                                                           | 5 (0)   | 2 (0)  | 3 (1)    | 0.264  |
| Materials that are consistent with public health vaccination recommendation <sup>2</sup> | 100 (7) | 74 (8) | 26 (5)   | 0.030  |
| “www.swissmom.ch”                                                                        | 20 (1)  | 16 (2) | 4 (1)    | 0.132  |
| “Wir Eltern”                                                                             | 8 (1)   | 7 (1)  | 1 (0)    | 0.164  |
| “Beobachter”                                                                             | 6 (0)   | 2 (0)  | 4 (1)    | 0.117  |
| “Puls”                                                                                   | 6 (0)   | 4 (0)  | 2 (0)    | 0.890  |
| Google                                                                                   | 98 (7)  | 78 (9) | 20 (4)   | 0.001  |
| Scientific literature <sup>4</sup>                                                       | 55 (4)  | 37 (4) | 18 (4)   | 0.601  |
| No source, missing, don't know, don't want to disclose                                   | 49 (4)  | 26 (3) | 23 (5)   | 0.106  |
| Medical work experience <sup>3</sup>                                                     | 42 (3)  | 30 (3) | 12 (2)   | 0.306  |
| Nurse                                                                                    | 8 (1)   | 6 (1)  | 2 (0)    | 0.514  |
| News                                                                                     | 31 (2)  | 22 (2) | 9 (2)    | 0.411  |
| Personal experience, gut feeling                                                         | 26 (2)  | 10 (1) | 16 (3)   | 0.006  |
| Described as neutral                                                                     | 9 (1)   | 0 (0)  | 9 (2)    | <0.001 |

**Note.** <sup>1</sup>Family, friends, and acquaintances; <sup>2</sup>Print media, websites, organizations, TV programs, and films that are critical of or consistent with public health vaccination recommendations based on our detailed assessment and on consensus among research team members; <sup>3</sup>Medical, biological, or pharmaceutical training or work experience of the interviewee or the other parent of the target child; <sup>4</sup>As stated by the interviewee. Pearson's Chi-squared tests were used for statistical analysis.

312

313 In **Table 3**, we list where parents reported having obtained trusted information about  
 314 vaccination. We list all information channels reported by at least 5 parents. The Internet was  
 315 considered the most trustworthy medium by non-VH parents and VH parents in similar  
 316 proportions (299 [34%] vs. 176 [35%];  $p=0.572$ ). However, VH parents cited print media as  
 317 their most trusted medium of vaccination information more frequently than non-VH parents  
 318 (237 [47%] vs. 176 [20%];  $p<0.001$ ), including books and brochures (129 [26%] vs. 63 [7%];  
 319  $p<0.001$ ). With regards to specific internet sources, non-VH parents were more likely to  
 320 report Google than VH parents (78 [9%] vs. 20 [4%];  $p=0.001$ ) as a trusted medium for  
 321 vaccination information. VH parents were more likely than non-VH parents to cite social  
 322 media (26 [5%] vs. 21 [2%];  $p=0.005$ ), although overall few parents in either group cited this  
 323 as a trusted information source.

**Table 3.** Types of trusted media for vaccination information

|  | All parents | By PACV-score |
|--|-------------|---------------|
|--|-------------|---------------|



|     | (N=1390)                       | Non-VH parents<br>(N=889) | VH parents<br>(N=501) |          |        |
|-----|--------------------------------|---------------------------|-----------------------|----------|--------|
|     | N (%)                          | N (%)                     | N (%)                 | P value  |        |
| 324 |                                |                           |                       |          |        |
| 325 |                                |                           |                       |          |        |
|     | <i>Internet</i>                | 475 (34)                  | 299 (34)              | 176 (35) | 0.572  |
|     | <i>Google</i>                  | 98 (7)                    | 78 (9)                | 20 (4)   | 0.001  |
| 326 | <i>Social media</i>            | 47 (3)                    | 21 (2)                | 26 (5)   | 0.005  |
|     | <i>Facebook</i>                | 17 (1)                    | 7 (1)                 | 10 (2)   | 0.490  |
| 327 | <i>Print media</i>             | 413 (30)                  | 176 (20)              | 237 (47) | <0.001 |
|     | <i>Books and brochures</i>     | 192 (14)                  | 63 (7)                | 129 (26) | <0.001 |
| 328 | <i>Magazine and newspapers</i> | 60 (4)                    | 42 (5)                | 18 (4)   | 0.319  |
|     | <i>TV</i>                      | 67 (5)                    | 37 (4)                | 30 (6)   | 0.127  |
| 329 | <i>Films</i>                   | 13 (1)                    | 1 (0)                 | 12 (2)   | <0.001 |
|     | <i>Conferences</i>             | 9 (1)                     | 2 (0)                 | 7 (1)    | 0.150  |

**Note.** Pearson's Chi-squared tests were used for statistical analysis.

### 3.3 Satisfaction with and trust in the primary provider

Our results suggest that more VH parents than non-VH parents consulted providers other than the child's primary provider when making vaccination decisions. We therefore explored whether this information seeking behavior is related to issues of (dis)satisfaction with and (dis)trust in the primary provider.

**Figure 2** and **Supplementary Table S1** show how VH parents were more likely to have discussed vaccination with their primary provider than non-VH parents (418 [83%] vs. 645 [73%];  $p < 0.001$ ). VH parents were less likely to be satisfied with and to trust their primary provider than non-VH parents (satisfaction: 342 [82%] vs. 586 [91%]; trust: 368 [88%] vs. 632 [98%];  $p < 0.001$  for both satisfaction and trust). When their primary provider was biomedically oriented, this difference was even more notable (satisfaction: 100 [69%] vs. 467 [91%]; trust: 120 [83%] vs. 503 [98%];  $p < 0.001$  for both satisfaction and trust). In contrast, when the primary provider was CAM-oriented, there was no significant difference in satisfaction and trust for VH and non-VH parents (satisfaction: 237 [89%] vs. 118 [89%]; trust: 243 [91%] vs. 128 [96%];  $p = 0.395$  and  $p = 0.164$ , respectively).

To evaluate issues of (dis)satisfaction and (dis)trust, we analyzed parents' responses regarding perceived agreement between their own vaccination view and their primary provider's view. VH parents reported significantly lower agreement between their own

1  
2  
3 350 vaccination view and their child's doctor perceived view than non-VH parents (271 [65%] vs.  
4  
5 351 567 [88%];  $p < 0.001$ ). The gap between parent and provider views was larger when the  
6  
7 352 primary provider was biomedically oriented (79 [54%] VH parents vs. 449 [88%] non-VH  
8  
9 353 parents;  $p < 0.001$ ) and smaller when the primary provider was CAM-oriented (188 [70%] VH  
10  
11 354 parents vs. 117 [88%] non-VH parents;  $p = 0.001$ ).  
12  
13  
14  
15 355

16  
17 356 **[Figure 2]**  
18

19 357  
20  
21 358 *3.4 Seeking multiple provider opinions on vaccination*  
22

23  
24 359 Given the important role children's doctors play in influencing parents' vaccination  
25  
26 360 decisions, we further explored a phenomenon that our initial qualitative work brought to light –  
27  
28 361 parents consulting with and/or switching from one to another provider, often to one offering  
29  
30 362 CAM services, in response to issues arising during vaccination consultations, a phenomenon  
31  
32 363 we call “provider browsing”. The following conversation with Mrs. Kugler, a 37-year-old  
33  
34 364 mother of one partially vaccinated child, illustrates this behavior (Pseudonyms are used for  
35  
36 365 participants):  
37  
38  
39

40 366 *Researcher:* Ok. I've already seen in the vaccination booklet, there are two or three  
41  
42 367 different doctors that you consult. Do you prefer to see a biomedical provider?  
43

44 368 *Mother:* Well, we actually tend to go to the homeopath. [...]. She's always a little, “I  
45  
46 369 told you so,” after every vaccination. But she tolerates it. It takes her two or three  
47  
48 370 weeks until she gets well enough to be neutral towards us again [laughing]. Because  
49  
50 371 we do vaccinate. And [the homeopath] is the one who treats [our daughter] when she's  
51  
52 372 sick. [...]. And if we needed a diagnosis, for example, if I wasn't sure whether it was  
53  
54 373 otitis media or something like that, I used to go see [the local pediatrician]. [...]. He is  
55  
56 374 a classic [biomedical] Algifor-Dafalgan [commonly prescribed pain killers in  
57  
58 375 Switzerland, containing ibuprofen and paracetamol, respectively] doctor.  
59  
60

1  
2  
3 376 *Researcher*: Ok. Purely conventional biomedical?  
4  
5 377 *Mother*: Yes, [...]. At every diagnosis. In winter, [my daughter] was very sick again  
6  
7  
8 378 with an extremely high temperature. Again, the remedy was Algifor. The doctor  
9  
10 379 added, ‘We should start vaccinating soon. [...]. It’s a classic fever. We can easily  
11  
12 380 vaccinate. It’s not too bad at this age.’ [...] I felt we were no longer in good hands and  
13  
14 381 switched to Dr. Heffelfinger [provider with additional training in anthroposophical  
15  
16 382 medicine].

17  
18  
19 383 Qualitative analysis of provider browsing suggested that parents were seeking health care  
20  
21 384 providers who were willing to listen to and understand parents’ rationales around vaccination  
22  
23 385 and their adherence to complementary and alternative approaches to medicine.

24  
25  
26 386 **Table 4** reports quantitative analysis of this phenomenon showing that more VH parents  
27  
28 387 than non-VH parents reported consulting with a provider other than the primary provider for  
29  
30 388 vaccination questions (196 [39%] vs. 173 [19%];  $p < 0.001$ ). We specifically asked questions  
31  
32 389 about parents’ motivations for consulting with another provider. More VH parents than non-  
33  
34 390 VH parents cited seeking a second opinion or having a disagreement as the reason for  
35  
36 391 consulting with another provider (87 [17%] vs. 38 [4%];  $p < 0.001$ ). Logistical reasons (e.g.,  
37  
38 392 parents moved, or provider stopped working) were mentioned with similar frequency (43  
39  
40 393 [9%] among VH parents vs. 68 [8%] among non-VH parents;  $p = 0.537$ ).

41  
42  
43 394 Interestingly, among parents who had asked another provider about vaccination, about  
44  
45 395 half as many VH parents as non-VH parents reported satisfaction with and trust in the other  
46  
47 396 provider (satisfaction: 82 [42%] vs. 142 [82%]; trust: 108 [55%] vs. 146 [84%];  $p < 0.001$  for  
48  
49 397 both satisfaction and trust).

50  
51  
52  
53  
54 **Table 4.** Parents having consulted another doctor about vaccination.

|                          | All parents<br>(N=1390) |      | By PACV-score             |                       | P value  |
|--------------------------|-------------------------|------|---------------------------|-----------------------|----------|
|                          |                         |      | Non-VH parents<br>(N=889) | VH parents<br>(N=501) |          |
|                          | N (%)                   |      | N (%)                     | N (%)                 |          |
| Consulted another doctor |                         |      |                           |                       | <0.001   |
| No                       | 1012                    | (73) | 712                       | (80)                  | 300 (60) |
| Yes                      | 369                     | (27) | 173                       | (19)                  | 196 (39) |

|                                                           |                     |                       |                   |                |
|-----------------------------------------------------------|---------------------|-----------------------|-------------------|----------------|
| Missing                                                   | 9 (1)               | 4 (0)                 | 5 (1)             |                |
| <i>Reason for consultation</i>                            |                     |                       |                   | <0.001         |
| Second opinion or disagreement                            | 125 (9)             | 38 (4)                | 87 (17)           |                |
| Moved or stopped working                                  | 111 (8)             | 68 (8)                | 43 (9)            |                |
| Other                                                     | 130 (9)             | 64 (7)                | 66 (13)           |                |
| Missing                                                   | 3 (0)               | 3 (0)                 | 0 (0)             |                |
|                                                           | <i>Total sample</i> | <i>By PACV-score</i>  |                   |                |
| <i>Parents with a biomedical primary doctor</i>           | (N=893)             | <i>Non-VH parents</i> | <i>VH parents</i> |                |
|                                                           |                     | (N=705)               | (N=188)           |                |
|                                                           | <i>N (%)</i>        | <i>N (%)</i>          | <i>N (%)</i>      | <i>P value</i> |
| <i>Consulted another doctor</i>                           |                     |                       |                   | 0.002          |
| No                                                        | 703 (79)            | 572 (81)              | 131 (70)          |                |
| Yes                                                       | 183 (20)            | 129 (18)              | 54 (29)           |                |
| Missing                                                   | 7 (1)               | 4 (1)                 | 3 (2)             |                |
| <i>Reason for consultation</i>                            |                     |                       |                   | 0.134          |
| Second opinion or disagreement                            | 46 (5)              | 27 (4)                | 19 (10)           |                |
| Moved or stopped working                                  | 71 (8)              | 55 (8)                | 16 (9)            |                |
| Other                                                     | 64 (7)              | 45 (6)                | 19 (10)           |                |
| Missing                                                   | 2 (0)               | 2 (0)                 | 0 (0)             |                |
|                                                           | <i>Total sample</i> | <i>By PACV-score</i>  |                   |                |
| <i>Parents with a CAM primary doctor</i>                  | (N=490)             | <i>Non-VH parents</i> | <i>VH parents</i> |                |
|                                                           |                     | (N=183)               | (N=307)           |                |
|                                                           | <i>N (%)</i>        | <i>N (%)</i>          | <i>N (%)</i>      | <i>P value</i> |
| <i>Consulted another doctor</i>                           |                     |                       |                   | <0.001         |
| No                                                        | 308 (63)            | 140 (77)              | 168 (55)          |                |
| Yes                                                       | 180 (37)            | 43 (23)               | 137 (45)          |                |
| Missing                                                   | 2 (0)               | 0 (0)                 | 2 (1)             |                |
| <i>Reason for consultation</i>                            |                     |                       |                   | 0.014          |
| Second opinion or disagreement                            | 75 (15)             | 10 (5)                | 65 (21)           |                |
| Moved or stopped working                                  | 40 (8)              | 13 (7)                | 27 (9)            |                |
| Other                                                     | 64 (13)             | 19 (10)               | 45 (15)           |                |
| Missing                                                   | 1 (0)               | 1 (1)                 | 0 (0)             |                |
|                                                           | <i>Total sample</i> | <i>By PACV-score</i>  |                   |                |
| <i>All parents having consulted another doctor before</i> | (N=369)             | <i>Non-VH parents</i> | <i>VH parents</i> |                |
|                                                           |                     | (N=173)               | (N=196)           |                |
|                                                           | <i>N (%)</i>        | <i>N (%)</i>          | <i>N (%)</i>      | <i>P value</i> |
| <i>Satisfied<sup>1</sup> with other doctor</i>            | 224 (61)            | 142 (82)              | 82 (42)           | <0.001         |
| <i>Trust<sup>3</sup> other doctor</i>                     | 254 (69)            | 146 (84)              | 108 (55)          | <0.001         |

**Note.** <sup>1</sup>Satisfied or very satisfied; <sup>2</sup>Somewhat or not at all satisfied; <sup>3</sup>Somewhat or completely. Pearson's Chi-squared tests were used for statistical analysis.

398

399 Given that VH parents report higher satisfaction and trust in CAM-oriented providers, we  
 400 investigated whether provider browsing varied by type of primary provider (i.e., biomedical  
 401 or CAM orientation). Among parents with biomedically oriented primary providers, more VH  
 402 parents than non-VH parents engaged in provider browsing (54 [29%] vs. 129 [18%];  
 403 p=0.002). However, this difference was even starker among parents with CAM-oriented  
 404 primary providers (137 [45%] of VH parents vs. 43 [23%] of non-VH parents; p<0.001).

405

## 406 4. Discussion

### 407 4.1. Principal findings

408 Our mixed-methods study has three main findings. First, our results confirm previous  
409 research showing that children's doctors are parents' most important vaccination information  
410 [4, 5, 6, 37]. Similarly, VH participants were more likely to turn to additional information  
411 sources, including their social networks, books, and other materials critical of official  
412 vaccination recommendations [5, 16, 17]. More VH parents than non-VH parents cited print  
413 media as a trusted information source. To our knowledge, this has not been reported on  
414 previously.

415 Second, VH parents expressed lower levels of satisfaction with and trust in their primary  
416 provider, particularly biomedically-oriented physicians. This finding is likely associated with  
417 our third main finding showing that VH parents engaged more in provider browsing than non-  
418 VH parents. Nevertheless, VH parents reported lower levels of satisfaction with and trust in  
419 these other providers. VH parents were more also likely to consult with CAM-oriented  
420 primary providers and to have higher levels of satisfaction with and trust in CAM than in  
421 biomedical providers. Interestingly, the phenomenon of VH parents having consulted with  
422 other providers about vaccination occurred more when the primary provider was CAM-  
423 oriented.

424 Previous research suggests that the relationship between VH and CAM use is not fully  
425 explained by VH individuals' trust in CAM services, but rather by distrust in biomedicine  
426 [15]. Accordingly, the VH parents in our sample may have been more likely to be pushed  
427 away from biomedicine than pulled toward CAM. While the behavior of information  
428 shopping and low trust in medical providers [9, 38] have been documented in previous  
429 research as characteristics of VH parents [39], VH parents' consultations with multiple  
430 providers about vaccination has, to our knowledge, not extensively been studied.

1  
2  
3 431 Our results suggest that VH parents' information seeking behaviors are likely an  
4  
5 432 expression of dissatisfaction and distrust. We argue that individuals who are exposed to a  
6  
7 433 variety of information [40], via the Internet [41, 42] or their social networks [17], are  
8  
9 434 likely to harbor concerns or doubts about official vaccination recommendations. Our  
10  
11 435 qualitative data suggest that these doubts may lead VH parents to seek information from  
12  
13 436 additional sources, by consulting a different doctor or reading additional information  
14  
15 437 materials. Reflecting previous findings [38], several parents described how persistent or novel  
16  
17 438 doubts, uncertainty, or dissatisfaction surfaced when they were exposed to new vaccination  
18  
19 439 information.

#### 23 440 *4.2. Strengths and weaknesses in relation to other studies*

24  
25 441 Our results allow us to question the assumptions of the knowledge deficit and health  
26  
27 442 literacy models [28]. Previous research has already found a link between VH and high levels  
28  
29 443 of health literacy [43], suggesting that informative/educational-only approaches are likely  
30  
31 444 ineffective for addressing VH [44, 45]. Our findings suggest that the knowledge deficit and  
32  
33 445 health literacy models, claiming that VH individuals are hesitant because they lack  
34  
35 446 information, are insufficient to explain VH. Rather, VH participants displayed more  
36  
37 447 information seeking behavior than non-VH parents.

#### 41 448 *4.3. Meaning of the study*

42  
43 449 Our results suggest potential intervention possibilities for addressing VH. An education-  
44  
45 450 only approach to teaching VH parents about childhood immunizations is likely to be  
46  
47 451 insufficient and perhaps even misguided. In effect, the VH participants in this study did not  
48  
49 452 lack information. Rather, they showed less trust in and usage of public health vaccination  
50  
51 453 recommendations, indicating that public health officials should engage in efforts to earn  
52  
53 454 public trust as a legitimate source of vaccination information. Since doctors are parents' most  
54  
55 455 trusted source of vaccination information, and dissatisfaction and distrust may push parents  
56  
57 456 away from vaccination, it is important for doctors to create trusting environments where

1  
2  
3 457 parents' vaccination questions and concerns are taken seriously and can be met with  
4  
5 458 satisfaction.

#### 6 7 8 459 *4.4. Unanswered questions and future research*

9  
10 460 Given that parental distrust and dissatisfaction is a major contributor to their VH, it should  
11  
12 461 be investigated why VH parents come to distrust doctors.

13  
14  
15 462

#### 16 17 463 **Acknowledgements**

18  
19 464 The authors acknowledge the effort and commitment of study participants, study nurse  
20  
21 465 Andrea Kloetzer, L. Suzanne Suggs, and medical students. We thank Mirjam Mäusezahl  
22  
23 466 (Federal Office of Public Health) for insightful discussions.

24  
25  
26 467

#### 27 28 468 **Funding**

29  
30 469 This work was supported by the Swiss National Science Foundation [National research  
31  
32 470 program NRP74] grant number [407440\_167398] and supplementary postdoctoral fellowship  
33  
34 471 funding from the Nora van Meeuwen-Haefliger-Foundation.

35  
36  
37 472

#### 38 39 473 **Transparency declaration**

40  
41  
42 474 The manuscript is an honest, accurate, and transparent account of the study being reported; no  
43  
44 475 important aspects of the study have been omitted.

45  
46  
47 476

#### 48 49 477 **Contributors**

50  
51 478 SE and MD co-drafted the manuscript. SE and KJ focused on the quantitative components  
52  
53 479 and MD and AB focused on the qualitative components. SM provided valuable feedback  
54  
55 480 during the writing process. BH, BW and DK gave rich insight into CAM in Switzerland. BH  
56  
57 481 and BW helped establishing the network of CAM providers and gave and insight into  
58  
59 482 pediatrics in Switzerland. AB was part of the gathering of qualitative data and gave valuable

1  
2  
3 483 feedback during the writing process. RE, JP and JH gathered qualitative data. PT was the head  
4  
5 484 of the entire project. He directed and supervised all operations from start to finish. He also  
6  
7 485 provided important expertise on infectious diseases and internal medicine. All authors read  
8  
9 486 and approved the final manuscript.  
10  
11

12 487

### 14 488 **Data sharing**

16  
17 489 Raw data supporting the findings of this study are available from the corresponding author  
18  
19 490 (PT) on request.  
20  
21 491

### 23 492 **COI disclosure statement and competing interests**

25  
26 493 All authors have completed the ICMJE uniform disclosure form at [www.icmje.org/  
27  
28 494 coi\\_disclosure.pdf](http://www.icmje.org/coi_disclosure.pdf) and declare: all authors had financial support from Swiss National Science  
29  
30 495 Foundation [National research program NRP74, grant 407440\_167398] and supplementary  
31  
32 496 postdoctoral fellowship funding from the Nora van Meeuwen-Haefliger-Foundation for the  
33  
34 497 submitted work; no financial relationships with any organizations that might have an interest  
35  
36 498 in the submitted work in the previous three years; no other relationships or activities that  
37  
38 499 could appear to have influenced the submitted work.  
39  
40  
41

42 500

### 44 501 **Figure legends**

46  
47 502 Figure 1. Number of trusted vaccination information sources.

48  
49 503 Note. Distribution of the number of trusted vaccination information sources. We divided  
50  
51 504 parents into non-VH and VH according to PACV score  $<$  or  $\geq 50$ . The median, mean (standard  
52  
53 505 deviation) of information sources was; 2, 2.80 (1.90) for the entire study population  
54  
55 506 (N=1390); 2, 2.70 (1.83) for the non-VH parents (N=889), and; 3, 2.98 (2.02) for the VH  
56  
57 507 parents (N=501). Wilcoxon Rank Sum test was used for statistical analysis.  
58  
59  
60



1  
2  
3 508 Figure 2. Parental satisfaction with and trust in the child's biomedical or CAM primary  
4  
5 509 provider.

6  
7  
8 510 Note. <sup>1</sup>Very satisfied or satisfied; <sup>2</sup>Completely or somewhat trust; <sup>3</sup>Completely or somewhat  
9  
10 511 agree; Percentages refer to the total number of non-VH and VH parent participants; Pearson's  
11  
12 512 Chi-squared tests were used for statistical analysis.

13  
14  
15 513

## 16 17 514 **References**

- 18  
19 515 [1] Rosenfield PL. The potential of transdisciplinary research for sustaining and extending  
20 516 linkages between the health and social sciences. *Social Science & Medicine*. 1992;35:1343-  
21 517 57. [https://doi.org/10.1016/0277-9536\(92\)90038-R](https://doi.org/10.1016/0277-9536(92)90038-R).
- 22  
23 518 [2] Larson HJ, Jarrett C, Eckersberger E, Smith DMD, Paterson P. Understanding vaccine  
24 519 hesitancy around vaccines and vaccination from a global perspective: A systematic review of  
25 520 published literature, 2007–2012. *Vaccine*. 2014;32:2150-9. 10.1016/j.vaccine.2014.01.081.
- 26  
27 521 [3] MacDonald NE. Vaccine hesitancy: Definition, scope and determinants. *Vaccine*.  
28 522 2015;33:4161-4. <https://doi.org/10.1016/j.vaccine.2015.04.036>.
- 29 523 [4] Kennedy A, LaVail K, Nowak G, Basket M, Landry S. Confidence about vaccines in the  
30 524 United States: understanding parents' perceptions. *Health affairs*. 2011;30:1151-9.  
31 525 <https://doi.org/10.1377/hlthaff.2011.0396>.
- 32  
33 526 [5] Charron J, Gautier A, Jestin C. Influence of information sources on vaccine hesitancy and  
34 527 practices. *Médecine et Maladies Infectieuses*. 2020;50:727-33.  
35 528 <https://doi.org/10.1016/j.medmal.2020.01.010>.
- 36  
37 529 [6] Freed GL, Clark SJ, Butchart AT, Singer DC, Davis MM. Sources and perceived credibility of  
38 530 vaccine-safety information for parents. *Pediatrics*. 2011;127:107-12.  
39 531 <https://doi.org/10.1542/peds.2010-1722P>.
- 40 532 [7] Dubé E, Laberge C, Guay M, Bramadat P, Roy R, Bettinger JA. Vaccine hesitancy: An  
41 533 overview. *Human Vaccines & Immunotherapeutics*. 2013;9:1763-73.  
42 534 <https://doi.org/10.4161/hv.24657>.
- 43  
44 535 [8] Goold SD, Lipkin Jr M. The doctor–patient relationship: Challenges, opportunities, and  
45 536 strategies. *Journal of General Internal Medicine*. 1999;14:26-33. 10.1046/j.1525-  
46 537 1497.1999.00267.x.
- 47  
48 538 [9] Benin AL, Wisler-Scher DJ, Colson E, Shapiro ED, Holmboe ES. Qualitative analysis of  
49 539 mothers' decision-making about vaccines for infants: the importance of trust. *Pediatrics*.  
50 540 2006;117:1532-41. <https://doi.org/10.1542/peds.2005-1728>.
- 51 541 [10] Wolf U, Maxison-Bergemann S, Bornhöft G, Matthiessen PF, Wolf M. Use of  
52 542 complementary medicine in Switzerland. *Complementary Medicine Research*. 2006;13:4-6.  
53 543 <https://doi.org/10.1159/000093488>.
- 54  
55 544 [11] Klein SD, Torchetti L, Frei-Erb M, Wolf U. Usage of complementary medicine in  
56 545 Switzerland: results of the Swiss health survey 2012 and development since 2007. *PloS one*.  
57 546 2015;10:e0141985. <https://doi.org/10.1371/journal.pone.0144676>.
- 58  
59 547 [12] Huber BM, Rodondi P-Y, Wildhaber J. Pediatric integrative medicine is an integral part of  
60 548 child health care in Switzerland. *Revue Medicale Suisse*. 2020;16:2289-92.

- 1  
2  
3 549 [13] Attwell K, Ward PR, Meyer SB, Rokkas PJ, Leask J. Do-it-yourself: Vaccine rejection and  
4 550 complementary and alternative medicine (CAM). *Social Science & Medicine*. 2018;196:106-  
5 551 14. <https://doi.org/10.1016/j.socscimed.2017.11.022>.
- 7 552 [14] Cassell JA, Leach M, Poltorak MS, Mercer CH, Iversen A, Fairhead JR. Is the cultural  
8 553 context of MMR rejection a key to an effective public health discourse? *Public Health*.  
9 554 2006;120:783-94. <https://doi.org/10.1016/j.puhe.2006.03.011>.
- 11 555 [15] Hornsey MJ, Lobera J, Díaz-Catalán C. Vaccine hesitancy is strongly associated with  
12 556 distrust of conventional medicine, and only weakly associated with trust in alternative  
13 557 medicine. *Social Science & Medicine*. 2020;255:113019.  
14 558 <https://doi.org/10.1016/j.socscimed.2020.113019>.
- 16 559 [16] Reich JA. We are fierce, independent thinkers and intelligent: Social capital and stigma  
17 560 management among mothers who refuse vaccines. *Social Science & Medicine*.  
18 561 2018;257:112015. <https://doi.org/10.1016/j.socscimed.2018.10.027>.
- 19 562 [17] Brunson EK. The impact of social networks on parents' vaccination decisions. *Pediatrics*.  
20 563 2013;131:e1397-e404. <https://doi.org/10.1542/peds.2012-2452>.
- 22 564 [18] Wilson SL, Wiysonge C. Social media and vaccine hesitancy. *BMJ Global Health*.  
23 565 2020;5:e004206. <http://dx.doi.org/10.1136/bmjgh-2020-004206>.
- 24 566 [19] Vrdelja M, Kraigher A, Verčič D, Kropivnik S. The growing vaccine hesitancy: exploring  
25 567 the influence of the internet. *European Journal of Public Health*. 2018;28:934-9.  
26 568 <https://doi.org/10.1093/eurpub/cky114>.
- 28 569 [20] Dubé E, Gagnon D, Nickels E, Jeram S, Schuster M. Mapping vaccine hesitancy—  
29 570 Country-specific characteristics of a global phenomenon. *Vaccine*. 2014;32:6649-54.  
30 571 <https://doi.org/10.1016/j.vaccine.2014.09.039>.
- 32 572 [21] Kata A. A Postmodern Pandora's Box: Anti-Vaccination Misinformation on the Internet.  
33 573 *Vaccine*. 2010;28:1709-16.
- 34 574 [22] Johnson NF, Velásquez N, Restrepo NJ, Leahy R, Gabriel N, El Oud S, et al. The online  
35 575 competition between pro-and anti-vaccination views. *Nature*. 2020;582:230-3.  
36 576 <https://doi.org/10.1038/s41586-020-2281-1>.
- 37 577 [23] Stahl J, Cohen R, Denis F, Gaudelus J, Martinot A, Lery T, et al. The impact of the web  
38 578 and social networks on vaccination. New challenges and opportunities offered to fight  
39 579 against vaccine hesitancy. *Médecine et Maladies Infectieuses*. 2016;46:117-22.  
40 580 <https://doi.org/10.1016/j.medmal.2016.02.002>.
- 42 581 [24] Rossen I, Hurlstone MJ, Lawrence C. Going with the grain of cognition: Applying insights  
43 582 from psychology to build support for childhood vaccination. *Frontiers in Psychology*.  
44 583 2016;7:1483. <https://doi.org/10.3389/fpsyg.2016.01483>.
- 46 584 [25] Sørensen K, Van den Broucke S, Fullam J, Doyle G, Pelikan J, Slonska Z, et al. Health  
47 585 literacy and public health: A systematic review and integration of definitions and models.  
48 586 *BMC Public Health*. 2012;12:80. <https://doi.org/10.1186/1471-2458-12-80>.
- 49 587 [26] Parker R. Health literacy: A challenge for American patients and their health care  
50 588 providers. *Health Promotion International*. 2000;15:277-83.  
51 589 <https://doi.org/10.1093/heapro/15.4.277>.
- 53 590 [27] Kutner M, Greenburg E, Jin Y, Paulsen C. The Health Literacy of America's Adults: Results  
54 591 from the 2003 National Assessment of Adult Literacy (NCES 2006-483). US Department of  
55 592 Education Washington, DC: National Center for Education Statistics. 2006.
- 57 593 [28] Kitta A, Goldberg DS. The significance of folklore for vaccine policy: discarding the deficit  
58 594 model. *Critical Public Health*. 2017;27:506-14.  
59 595 <https://doi.org/10.1080/09581596.2016.1235259>.
- 60

- 1  
2  
3 596 [29] Jarrett C, Wilson R, O'Leary M, Eckersberger E, Larson HJ. Strategies for addressing  
4 597 vaccine hesitancy – A systematic review. *Vaccine*. 2015;33:4180-90.  
5 598 <https://doi.org/10.1016/j.vaccine.2015.04.040>.  
6  
7 599 [30] Deml MJ, Jafflin K, Merten S, Huber B, Buhl A, Frau E, et al. Determinants of vaccine  
8 600 hesitancy in Switzerland: study protocol of a mixed-methods national research programme.  
9 601 *BMJ open*. 2019;9:e032218. <http://dx.doi.org/10.1136/bmjopen-2019-032218>.  
10 602  
11 603 [31] Creswell JW, Clark VLP. *Designing and conducting mixed methods research*. Thousand  
12 604 Oaks, California: SAGE Publications, Inc.; 2017.  
13 605 [32] Gale NK, Heath G, Cameron E, Rashid S, Redwood S. Using the framework method for  
14 606 the analysis of qualitative data in multi-disciplinary health research. *BMC Medical Research  
15 607 Methodology*. 2013;13:1-8. <https://doi.org/10.1186/1471-2288-13-117>.  
16 608  
17 609 [33] Opel DJ, Mangione-Smith R, Taylor JA, Korfiatis C, Wiese C, Catz S, et al. Development of  
18 610 a survey to identify vaccine-hesitant parents: The parent attitudes about childhood vaccines  
19 611 survey. *Human Vaccines*. 2011;7:419-25. <https://doi.org/10.4161/hv.7.4.14120>.  
20 612  
21 613 [34] Opel DJ, Taylor JA, Mangione-Smith R, Solomon C, Zhao C, Catz S, et al. Validity and  
22 614 reliability of a survey to identify vaccine-hesitant parents. *Vaccine*. 2011;29:6598-605.  
23 615 10.1016/j.vaccine.2011.06.115.  
24 616 [35] Opel DJ, Taylor JA, Zhou C, Catz S, Myaing M, Mangione-Smith R. The relationship  
25 617 between parent attitudes about childhood vaccines survey scores and future child  
26 618 immunization status: A validation study. *JAMA Pediatrics*. 2013;167:1065-71.  
27 619 10.1001/jamapediatrics.2013.2483.  
28 620 [36] Olarewaju VO, Jafflin K, Deml MJ, Zimmermann C, Sonderegger J, Preda T, et al.  
29 621 Application of the Parent Attitudes about Childhood Vaccines (PACV) survey in three  
30 622 national languages in Switzerland: Exploratory factor analysis and Mokken scale analysis.  
31 623 *Human Vaccines & Immunotherapeutics*. 2021;1-9.  
32 624 <https://doi.org/10.1080/21645515.2021.1894894>.  
33 625  
34 626 [37] Giambi C, Fabiani M, D'Ancona F, Ferrara L, Fiacchini D, Gallo T, et al. Parental vaccine  
35 627 hesitancy in Italy – Results from a national survey. *Vaccine*. 2018;36:779-87.  
36 628 <https://doi.org/10.1016/j.vaccine.2017.12.074>.  
37 629  
38 630 [38] Glanz JM, Wagner NM, Narwaney KJ, Shoup JA, McClure DL, McCormick EV, et al. A  
39 631 mixed methods study of parental vaccine decision making and parent-provider trust.  
40 632 *Academic Pediatrics*. 2013;13:481-8. <https://doi.org/10.1016/j.acap.2013.05.030>.  
41 633  
42 634 [39] Eller NM, Henrikson NB, Opel DJ. Vaccine information sources and parental trust in their  
43 635 child's health care provider. *Health Education & Behavior*. 2019;46:445-53.  
44 636 <https://doi.org/10.1177/1090198118819716>.  
45 637  
46 638 [40] Wang E, Baras Y, Bottenheim AM. "Everybody just wants to do what's best for their  
47 639 child": Understanding how pro-vaccine parents can support a culture of vaccine hesitancy.  
48 640 *Vaccine*. 2015;33:6703-9. <https://doi.org/10.1016/j.vaccine.2015.10.090>.  
49 641  
50 642 [41] Sobo EJ, Huhn A, Sannwald A, Thurman L. Information Curation among Vaccine Cautious  
51 643 Parents: Web 2.0, Pinterest Thinking, and Pediatric Vaccination Choice. *Medical  
52 644 Anthropology*. 2016;35:529-46. 10.1080/01459740.2016.1145219.  
53 645  
54 646 [42] Betsch C, Brewer NT, Brocard P, Davies P, Gaissmaier W, Haase N, et al. Opportunities  
55 647 and challenges of Web 2.0 for vaccination decisions. *Vaccine*. 2012;30:3727-33.  
56 648 <https://doi.org/10.1016/j.vaccine.2012.02.025>.  
57 649  
58 650 [43] Aharon AA, Nehama H, Rishpon S, Baron-Epel O. Parents with high levels of  
59 651 communicative and critical health literacy are less likely to vaccinate their children. *Patient  
60 652 Education and Counseling*. 2017;100:768-75. <https://doi.org/10.1016/j.pec.2016.11.016>.

- 1  
2  
3 643 [44] Gagneur A, Gosselin V, Dubé È. Motivational interviewing: A promising tool to address  
4 644 vaccine hesitancy. *Vaccine*. 2018;36:6553-5. <https://doi.org/10.1016/j.vaccine.2017.10.049>.  
5  
6 645 [45] Gagneur A, Lemaître T, Gosselin V, Farrands A, Carrier N, Petit G, et al. A postpartum  
7 646 vaccination promotion intervention using motivational interviewing techniques improves  
8 647 short-term vaccine coverage: PromoVac study. *BMC Public Health*. 2018;18:1-8.  
9 648 <https://doi.org/10.1186/s12889-018-5724-y>.  
10 649  
11  
12  
13  
14  
15  
16  
17  
18  
19  
20  
21  
22  
23  
24  
25  
26  
27  
28  
29  
30  
31  
32  
33  
34  
35  
36  
37  
38  
39  
40  
41  
42  
43  
44  
45  
46  
47  
48  
49  
50  
51  
52  
53  
54  
55  
56  
57  
58  
59  
60

**Figure 1.** Number of trusted vaccination information sources.

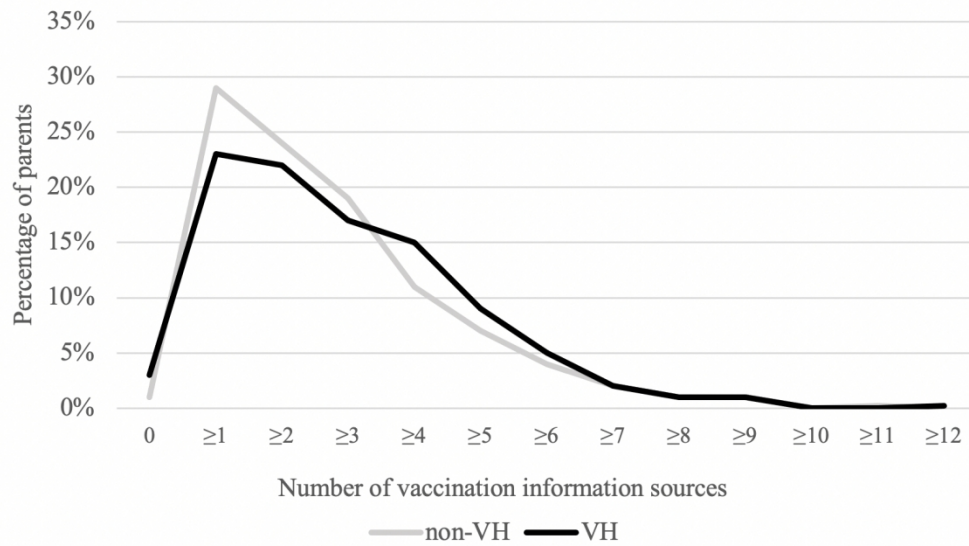

**Note.** Distribution of the number of trusted vaccination information sources. We divided parents into non-VH and VH according to PACV score  $<$  or  $\geq 50$ . The median, mean (standard deviation) of information sources was; 2, 2.80 (1.90) for the entire study population (N=1390); 2, 2.70 (1.83) for the non-VH parents (N=889), and; 3, 2.98 (2.02) for the VH parents (N=501). Wilcoxon Rank Sum test was used for statistical analysis.

Figure 1. Number of trusted vaccination information sources.

Figure 2. Parental satisfaction with and trust in the child’s biomedical or CAM primary provider.

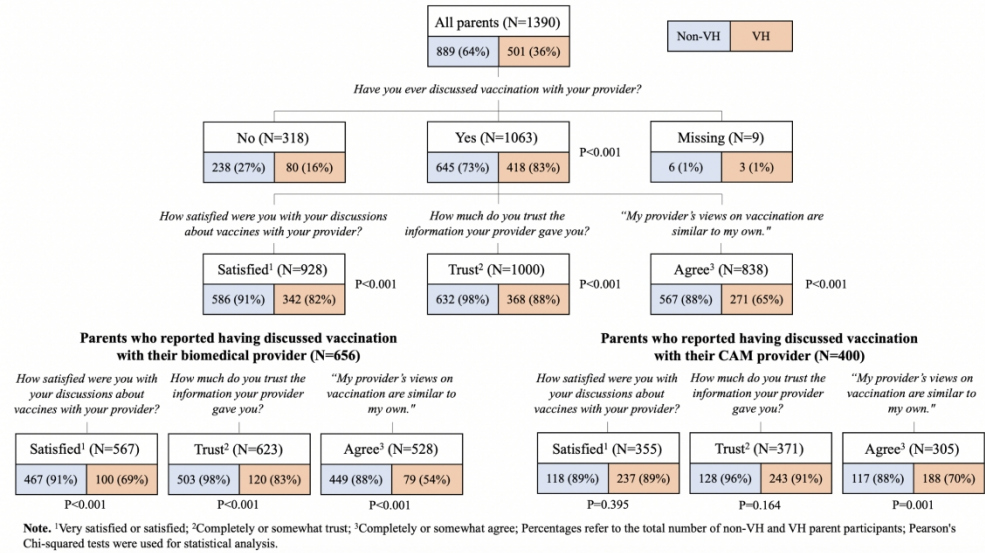

Figure 2. Parental satisfaction with and trust in the child’s biomedical or CAM primary provider.

1  
2  
3  
4  
5  
6  
7  
8  
9  
10  
11  
12  
13  
14  
15  
16  
17  
18  
19  
20  
21  
22  
23  
24  
25  
26  
27  
28  
29  
30  
31  
32  
33  
34  
35  
36  
37  
38  
39  
40  
41  
42  
43  
44  
45  
46  
47  
48  
49  
50  
51  
52  
53  
54  
55  
56  
57  
58  
59  
60**Supplementary Table S1.** Satisfaction with and trust in primary biomedically- and CAM-oriented providers.

|                                                                                                        | <i>All parents</i><br>(N=1390)  | <i>By PACV-score</i>             |                              | <i>P value</i> |
|--------------------------------------------------------------------------------------------------------|---------------------------------|----------------------------------|------------------------------|----------------|
|                                                                                                        |                                 | <i>Non-VH parents</i><br>(N=889) | <i>VH parents</i><br>(N=501) |                |
|                                                                                                        | <i>N (%)</i>                    | <i>N (%)</i>                     | <i>N (%)</i>                 |                |
| <i>Type of primary provider</i>                                                                        |                                 |                                  |                              | <0.001         |
| <i>Biomedical</i>                                                                                      | 893 (64)                        | 705 (79)                         | 188 (38)                     |                |
| <i>CAM</i>                                                                                             | 490 (35)                        | 183 (21)                         | 307 (61)                     |                |
| <i>Missing</i>                                                                                         | 7 (1)                           | 1 (0)                            | 6 (1)                        |                |
| <i>Discussed vaccines with primary provider</i>                                                        |                                 |                                  |                              | <0.001         |
| <i>No</i>                                                                                              | 318 (23)                        | 238 (27)                         | 80 (16)                      |                |
| <i>Yes</i>                                                                                             | 1063 (76)                       | 645 (73)                         | 418 (83)                     |                |
| <i>Missing</i>                                                                                         | 9 (1)                           | 6 (1)                            | 3 (1)                        |                |
| <i>Parents who reported having discussed vaccination with primary provider</i>                         | <i>Total sample</i><br>(N=1063) | <i>By PACV-score</i>             |                              |                |
|                                                                                                        |                                 | <i>Non-VH parents</i><br>(N=645) | <i>VH parents</i><br>(N=418) |                |
|                                                                                                        | <i>N (%)</i>                    | <i>N (%)</i>                     | <i>N (%)</i>                 | <i>P value</i> |
| <i>Satisfied with provider<sup>1</sup></i>                                                             | 928 (87)                        | 586 (91)                         | 342 (82)                     | <0.001         |
| <i>Trust provider<sup>2</sup></i>                                                                      | 1000 (94)                       | 632 (98)                         | 368 (88)                     | <0.001         |
| <i>Provider's views are similar to parents<sup>2</sup></i>                                             | 838 (79)                        | 567 (88)                         | 271 (65)                     | <0.001         |
| <i>Parents who reported having discussed vaccination with biomedical primary provider</i>              | <i>Total sample</i><br>(N=656)  | <i>By PACV-score</i>             |                              |                |
|                                                                                                        |                                 | <i>Non-VH parents</i><br>(N=511) | <i>VH parents</i><br>(N=145) |                |
|                                                                                                        | <i>N (%)</i>                    | <i>N (%)</i>                     | <i>N (%)</i>                 | <i>P value</i> |
| <i>Satisfied with provider<sup>1</sup></i>                                                             | 567 (86)                        | 467 (91)                         | 100 (69)                     | <0.001         |
| <i>Trust provider<sup>2</sup></i>                                                                      | 623 (95)                        | 503 (98)                         | 120 (83)                     | <0.001         |
| <i>Provider's views are similar to parents<sup>2</sup></i>                                             | 528 (80)                        | 449 (88)                         | 79 (54)                      | <0.001         |
| <i>Parents who reported having discussed vaccination with CAM primary provider</i>                     | <i>Total sample</i><br>(N=400)  | <i>By PACV-score</i>             |                              |                |
|                                                                                                        |                                 | <i>Non-VH parents</i><br>(N=133) | <i>VH parents</i><br>(N=267) |                |
|                                                                                                        | <i>N (%)</i>                    | <i>N (%)</i>                     | <i>N (%)</i>                 | <i>P value</i> |
| <i>Satisfied with provider<sup>1</sup></i>                                                             | 355 (89)                        | 118 (89)                         | 237 (89)                     | 0.395          |
| <i>Trust provider<sup>2</sup></i>                                                                      | 371 (93)                        | 128 (96)                         | 243 (91)                     | 0.164          |
| <i>Provider's views are similar to parents<sup>2</sup></i>                                             | 305 (76)                        | 117 (88)                         | 188 (70)                     | 0.001          |
| <i>Parents reporting that primary providers' views are similar to their own<sup>2</sup></i>            | <i>Total sample</i><br>(N=838)  | <i>By PACV-score</i>             |                              |                |
|                                                                                                        |                                 | <i>Non-VH parents</i><br>(N=567) | <i>VH parents</i><br>(N=271) |                |
|                                                                                                        | <i>N (%)</i>                    | <i>N (%)</i>                     | <i>N (%)</i>                 | <i>P value</i> |
| <i>Satisfied with provider<sup>1</sup></i>                                                             | 774 (92)                        | 522 (92)                         | 252 (93)                     | 0.485          |
| <i>Trust provider<sup>2</sup></i>                                                                      | 820 (98)                        | 560 (99)                         | 260 (96)                     | 0.004          |
| <i>Parents reporting that biomedical primary providers' views are similar to their own<sup>2</sup></i> | <i>Total sample</i><br>(N=528)  | <i>By PACV-score</i>             |                              |                |
|                                                                                                        |                                 | <i>Non-VH parents</i><br>(N=449) | <i>VH parents</i><br>(N=79)  |                |
|                                                                                                        | <i>N (%)</i>                    | <i>N (%)</i>                     | <i>N (%)</i>                 | <i>P value</i> |
| <i>Satisfied with provider<sup>1</sup></i>                                                             | 479 (91)                        | 413 (92)                         | 66 (84)                      | 0.081          |
| <i>Trust provider<sup>2</sup></i>                                                                      | 518 (98)                        | 444 (99)                         | 74 (94)                      | <0.001         |
| <i>Parents reporting that CAM primary providers' views are similar to their own<sup>2</sup></i>        | <i>Total sample</i><br>(N=305)  | <i>By PACV-score</i>             |                              |                |
|                                                                                                        |                                 | <i>Non-VH parents</i><br>(N=117) | <i>VH parents</i><br>(N=188) |                |
|                                                                                                        | <i>N (%)</i>                    | <i>N (%)</i>                     | <i>N (%)</i>                 | <i>P value</i> |
| <i>Satisfied with provider<sup>1</sup></i>                                                             | 290 (95)                        | 108 (92)                         | 182 (97)                     | 0.141          |
| <i>Trust provider<sup>2</sup></i>                                                                      | 297 (97)                        | 115 (98)                         | 182 (97)                     | 0.516          |

**Note.** <sup>1</sup>Satisfied/very satisfied; <sup>2</sup>Somewhat or completely; Pearson's Chi-squared tests were used for statistical analysis.

STROBE Statement—Checklist of items that should be included in reports of *cross-sectional studies*

|                                               | Item No | Recommendation                                                                                                                                                                                                                                                                                                                             |
|-----------------------------------------------|---------|--------------------------------------------------------------------------------------------------------------------------------------------------------------------------------------------------------------------------------------------------------------------------------------------------------------------------------------------|
| <b>Title and abstract yes (p. 1-2)</b>        | 1       | (a) Indicate the study's design with a commonly used term in the title or the abstract<br>(b) Provide in the abstract an informative and balanced summary of what was done and what was found                                                                                                                                              |
| <b>Introduction</b>                           |         |                                                                                                                                                                                                                                                                                                                                            |
| Background/rationale <b>yes (p. 3-5)</b>      | 2       | Explain the scientific background and rationale for the investigation being reported                                                                                                                                                                                                                                                       |
| Objectives <b>yes (p. 5)</b>                  | 3       | State specific objectives, including any prespecified hypotheses                                                                                                                                                                                                                                                                           |
| <b>Methods</b>                                |         |                                                                                                                                                                                                                                                                                                                                            |
| Study design <b>yes (p. 6)</b>                | 4       | Present key elements of study design early in the paper                                                                                                                                                                                                                                                                                    |
| Setting <b>yes (p. 6)</b>                     | 5       | Describe the setting, locations, and relevant dates, including periods of recruitment, exposure, follow-up, and data collection                                                                                                                                                                                                            |
| Participants <b>yes (p. 6-7)</b>              | 6       | Give the eligibility criteria, and the sources and methods of selection of participants                                                                                                                                                                                                                                                    |
| Variables <b>yes (p. 6-8)</b>                 | 7       | Clearly define all outcomes, exposures, predictors, potential confounders, and effect modifiers. Give diagnostic criteria, if applicable                                                                                                                                                                                                   |
| Data sources/ measurement <b>yes (p. 7-8)</b> | 8*      | For each variable of interest, give sources of data and details of methods of assessment (measurement). Describe comparability of assessment methods if there is more than one group                                                                                                                                                       |
| Bias                                          | 9       | Describe any efforts to address potential sources of bias                                                                                                                                                                                                                                                                                  |
| Study size <b>yes (p. 8-9)</b>                | 10      | Explain how the study size was arrived at                                                                                                                                                                                                                                                                                                  |
| Quantitative variables <b>yes (p. 7)</b>      | 11      | Explain how quantitative variables were handled in the analyses. If applicable, describe which groupings were chosen and why                                                                                                                                                                                                               |
| Statistical methods <b>yes (p. 7)</b>         | 12      | (a) Describe all statistical methods, including those used to control for confounding<br>(b) Describe any methods used to examine subgroups and interactions<br>(c) Explain how missing data were addressed<br>(d) If applicable, describe analytical methods taking account of sampling strategy<br>(e) Describe any sensitivity analyses |
| <b>Results</b>                                |         |                                                                                                                                                                                                                                                                                                                                            |
| Participants <b>yes (p. 8-9)</b>              | 13*     | (a) Report numbers of individuals at each stage of study—eg numbers potentially eligible, examined for eligibility, confirmed eligible, included in the study, completing follow-up, and analysed<br>(b) Give reasons for non-participation at each stage<br>(c) Consider use of a flow diagram                                            |
| Descriptive data <b>yes (p. 8-9)</b>          | 14*     | (a) Give characteristics of study participants (eg demographic, clinical, social) and information on exposures and potential confounders<br>(b) Indicate number of participants with missing data for each variable of interest                                                                                                            |
| Outcome data                                  | 15*     | Report numbers of outcome events or summary measures                                                                                                                                                                                                                                                                                       |
| Main results <b>yes (p. 9-18)</b>             | 16      | (a) Give unadjusted estimates and, if applicable, confounder-adjusted estimates and their precision (eg, 95% confidence interval). Make clear which confounders were adjusted for and why they were included<br>(b) Report category boundaries when continuous variables were categorized                                                  |



(c) If relevant, consider translating estimates of relative risk into absolute risk for a meaningful time period

|                                           |    |                                                                                                                                                                            |
|-------------------------------------------|----|----------------------------------------------------------------------------------------------------------------------------------------------------------------------------|
| Other analyses                            | 17 | Report other analyses done—eg analyses of subgroups and interactions, and sensitivity analyses                                                                             |
| <b>Discussion</b>                         |    |                                                                                                                                                                            |
| Key results <b>yes (p. 18-19)</b>         | 18 | Summarise key results with reference to study objectives                                                                                                                   |
| Limitations <b>yes (p. 3)</b>             | 19 | Discuss limitations of the study, taking into account sources of potential bias or imprecision. Discuss both direction and magnitude of any potential bias                 |
| Interpretation <b>yes (18-20)</b>         | 20 | Give a cautious overall interpretation of results considering objectives, limitations, multiplicity of analyses, results from similar studies, and other relevant evidence |
| Generalisability <b>yes (p. 3, 19-20)</b> | 21 | Discuss the generalisability (external validity) of the study results                                                                                                      |
| <b>Other information</b>                  |    |                                                                                                                                                                            |
| Funding <b>yes (p. 20)</b>                | 22 | Give the source of funding and the role of the funders for the present study and, if applicable, for the original study on which the present article is based              |

\*Give information separately for exposed and unexposed groups.

**Note:** An Explanation and Elaboration article discusses each checklist item and gives methodological background and published examples of transparent reporting. The STROBE checklist is best used in conjunction with this article (freely available on the Web sites of PLoS Medicine at <http://www.plosmedicine.org/>, Annals of Internal Medicine at <http://www.annals.org/>, and Epidemiology at <http://www.epidem.com/>). Information on the STROBE Initiative is available at [www.strobe-statement.org](http://www.strobe-statement.org).

# BMJ Open

## Parents' Vaccination Information Seeking, Satisfaction with, and Trust in Medical Providers in Switzerland: A Mixed-Methods Study

|                                 |                                                                                                                                                                                                                                                                                                                                                                                                                                                                                                                                                                                                                                                                                                                                                                                                                                                                                                |
|---------------------------------|------------------------------------------------------------------------------------------------------------------------------------------------------------------------------------------------------------------------------------------------------------------------------------------------------------------------------------------------------------------------------------------------------------------------------------------------------------------------------------------------------------------------------------------------------------------------------------------------------------------------------------------------------------------------------------------------------------------------------------------------------------------------------------------------------------------------------------------------------------------------------------------------|
| Journal:                        | <i>BMJ Open</i>                                                                                                                                                                                                                                                                                                                                                                                                                                                                                                                                                                                                                                                                                                                                                                                                                                                                                |
| Manuscript ID                   | bmjopen-2021-053267.R1                                                                                                                                                                                                                                                                                                                                                                                                                                                                                                                                                                                                                                                                                                                                                                                                                                                                         |
| Article Type:                   | Original research                                                                                                                                                                                                                                                                                                                                                                                                                                                                                                                                                                                                                                                                                                                                                                                                                                                                              |
| Date Submitted by the Author:   | 16-Dec-2021                                                                                                                                                                                                                                                                                                                                                                                                                                                                                                                                                                                                                                                                                                                                                                                                                                                                                    |
| Complete List of Authors:       | Ebi, Selina; Kantonsspital Baselland Medizinische Universitätsklinik Standort Bruderholz, ; Universität Basel Medizinische Fakultät, Deml, Michael; Institute of Sociological Research, University of Geneva, Department of Sociology; University of Cape Town School of Public Health and Family Medicine, Division of Social and Behavioural Sciences Jafflin, Kristen; Swiss Tropical and Public Health Institute; University of Basel<br>Buhl, Andrea; Swiss Tropical and Public Health Institute<br>Engel, Rebecca; University of Basel<br>Picker, Julia; University of Basel<br>Häusler, Julia; University of Basel<br>Wingeier, Bernhard; Klinik Arlesheim AG<br>Krüerke, Daniel; Klinik Arlesheim AG<br>Huber, Benedikt; HFR Fribourg Cantonal Hospital, Department of Pediatrics<br>Merten, Sonja; Swiss Tropical and Public Health Institute,<br>Tarr, Philip ; University of Basel, |
| <b>Primary Subject Heading</b>: | Sociology                                                                                                                                                                                                                                                                                                                                                                                                                                                                                                                                                                                                                                                                                                                                                                                                                                                                                      |
| Secondary Subject Heading:      | Infectious diseases, Complementary medicine, Paediatrics                                                                                                                                                                                                                                                                                                                                                                                                                                                                                                                                                                                                                                                                                                                                                                                                                                       |
| Keywords:                       | Public health < INFECTIOUS DISEASES, MEDICAL ETHICS, Paediatric infectious disease & immunisation < PAEDIATRICS, Epidemiology < INFECTIOUS DISEASES                                                                                                                                                                                                                                                                                                                                                                                                                                                                                                                                                                                                                                                                                                                                            |
|                                 |                                                                                                                                                                                                                                                                                                                                                                                                                                                                                                                                                                                                                                                                                                                                                                                                                                                                                                |

SCHOLARONE™  
Manuscripts



I, the Submitting Author has the right to grant and does grant on behalf of all authors of the Work (as defined in the below author licence), an exclusive licence and/or a non-exclusive licence for contributions from authors who are: i) UK Crown employees; ii) where BMJ has agreed a CC-BY licence shall apply, and/or iii) in accordance with the terms applicable for US Federal Government officers or employees acting as part of their official duties; on a worldwide, perpetual, irrevocable, royalty-free basis to BMJ Publishing Group Ltd ("BMJ") its licensees and where the relevant Journal is co-owned by BMJ to the co-owners of the Journal, to publish the Work in this journal and any other BMJ products and to exploit all rights, as set out in our [licence](#).

The Submitting Author accepts and understands that any supply made under these terms is made by BMJ to the Submitting Author unless you are acting as an employee on behalf of your employer or a postgraduate student of an affiliated institution which is paying any applicable article publishing charge ("APC") for Open Access articles. Where the Submitting Author wishes to make the Work available on an Open Access basis (and intends to pay the relevant APC), the terms of reuse of such Open Access shall be governed by a Creative Commons licence – details of these licences and which [Creative Commons](#) licence will apply to this Work are set out in our licence referred to above.

Other than as permitted in any relevant BMJ Author's Self Archiving Policies, I confirm this Work has not been accepted for publication elsewhere, is not being considered for publication elsewhere and does not duplicate material already published. I confirm all authors consent to publication of this Work and authorise the granting of this licence.

1  
2  
3 **1 Parents' Vaccination Information Seeking, Satisfaction with, and Trust in Medical**  
4 **2 Providers in Switzerland: A Mixed-Methods Study**  
5  
6  
7

8 **Authors:** Selina Ebi<sup>1,2</sup> \* (physician; [ebi.selina@gmail.com](mailto:ebi.selina@gmail.com)), Michael J. Deml<sup>3,4</sup> \*(scientific  
9 collaborator; [michaeljdeml@gmail.com](mailto:michaeljdeml@gmail.com)), Kristen Jafflin<sup>5,2</sup> (scientific collaborator;  
10 [kristen.jafflin@swisstph.ch](mailto:kristen.jafflin@swisstph.ch)), Andrea Buhl<sup>5,2</sup> (scientific collaborator; [andrea.buhl@unibas.ch](mailto:andrea.buhl@unibas.ch)),  
11 Rebecca Engel<sup>1,2</sup> (medical student; [rebecca.engel@stud.unibas.ch](mailto:rebecca.engel@stud.unibas.ch)), Julia Picker<sup>1,2</sup> (medical  
12 student; [julia.picker@stud.unibas.ch](mailto:julia.picker@stud.unibas.ch)), Julia Häusler<sup>1,2</sup> (medical student;  
13 [julia.haesler@stud.unibas.ch](mailto:julia.haesler@stud.unibas.ch)), Bernhard Wingeier<sup>6</sup> (head physician;  
14 [bernhard.wingeier@klinik-arlesheim.ch](mailto:bernhard.wingeier@klinik-arlesheim.ch)), Daniel Krüerke<sup>6</sup> (scientific collaborator;  
15 [daniel.krueerke@klinik-arlesheim.ch](mailto:daniel.krueerke@klinik-arlesheim.ch)), Benedikt M. Huber<sup>7</sup> (senior physician/pediatrician;  
16 [benedikt.huber@h-fr.ch](mailto:benedikt.huber@h-fr.ch)), Sonja Merten<sup>5,2</sup> (physician/epidemiologist;  
17 [sonja.merten@swisstph.ch](mailto:sonja.merten@swisstph.ch)), Philip E. Tarr<sup>1,2</sup> (head physician; [philip.tarr@unibas.ch](mailto:philip.tarr@unibas.ch))  
18  
19

20 \* Equal contribution  
21  
22

23 **Correspondence:** Prof. Dr. med. Philip E. Tarr, National Research Program NFP74 Vaccine  
24 Hesitancy, University Dept. of Medicine, Kantonsspital Baselland, University of Basel, 4101  
25 Bruderholz, Switzerland, [philip.tarr@unibas.ch](mailto:philip.tarr@unibas.ch), phone +41 (61) 436 2212, fax +41 (61) 436  
26 3670  
27  
28

29 **Author Affiliations:**

- 30 1. University Department of Medicine, Kantonsspital Baselland, 4101 Bruderholz,  
31 Switzerland  
32 2. University of Basel, Petersplatz 1, 4051 Basel, Switzerland  
33 3. Institute of Sociological Research, Department of Sociology, University of Geneva, 1204  
34 Geneva, Switzerland  
35 4. Division of Social and Behavioural Sciences, School of Public Health & Family Medicine,  
36 University of Cape Town; Cape Town, South Africa  
37 5. Swiss Tropical and Public Health Institute, Socinstrasse 57, 4051 Basel, Switzerland  
38 6. Clinic Arlesheim, Pfeffingerweg 1, 4144 Arlesheim, Switzerland  
39 7. Department of Pediatrics, HFR Fribourg Cantonal Hospital, Fribourg, Switzerland  
40  
41  
42  
43  
44  
45  
46  
47  
48  
49  
50  
51  
52  
53  
54  
55  
56  
57  
58  
59  
60

1  
2  
3 36 **Word count:** 4621 (without strengths and weaknesses), 4718 (with strengths and weaknesses)

4 37

5 38 **Abbreviations:** Complementary and alternative medicine (CAM); Vaccine hesitancy or  
6 39 vaccine hesitant (VH); Parent Attitudes about Childhood Vaccines (PACV).

7 40

8 41 **Keywords**

9 42 Vaccine Hesitancy; Information Sources; Provider; Satisfaction; Trust

10 43

11 44 What is already known on this topic:

12 45 Trust in the medical providers, who are the main source of vaccination information, is crucial  
13 46 for facing vaccine hesitancy (VH).

14 47

15 48 What this study adds:

16 49 In Switzerland, where complementary and alternative medicine (CAM) is popular, little  
17 50 research has examined parents' vaccination decision-making process. Our findings suggest  
18 51 that VH parents seek out a variety of information sources and providers due to dissatisfaction  
19 52 with and distrust in previously obtained information. Since doctors are parents' most trusted  
20 53 source of vaccination information, it is important for doctors to create trusting environments  
21 54 where parents' vaccination questions and concerns are taken seriously and can be met with  
22 55 satisfaction.

23 56

24 57  
25  
26  
27  
28  
29  
30  
31  
32  
33  
34  
35  
36  
37  
38  
39  
40  
41  
42  
43  
44  
45  
46  
47  
48  
49  
50  
51  
52  
53  
54  
55  
56  
57  
58  
59  
60

## 58 **Abstract**

### 59 Objectives

60 The aim of this study was to better understand parental trust in and satisfaction with  
61 information sources and medical providers regarding decision-making about childhood  
62 vaccines.

### 63 Setting

64 The study was part of a Swiss national research program investigating vaccine hesitancy and  
65 underimmunization.

### 66 Participants

67 We conducted qualitative interviews with 37 providers and 30 parents, observed 34  
68 vaccination consultations, and then conducted quantitative surveys with 130 providers (both  
69 CAM- and biomedically oriented) and 1390 parents.

### 70 Main outcome measures

71 Participants' vaccination information sources used in their decision-making process,  
72 parents' trust in and satisfaction with these sources and providers.

### 73 Results

74 Based on the Parent Attitudes about Childhood Vaccines (PACV) scale, we considered 501  
75 parents as vaccine-hesitant (VH) and 889 parents as non-vaccine-hesitant (non-VH). Whereas  
76 both groups mentioned providers as the most trusted source of information, VH-parents were  
77 less likely to mention pediatricians (N=358[71%] vs. N=755[85%]) and public health  
78 authorities (N=101[20%] vs. N=333[37%]) than non-VH-parents. VH-parents were more  
79 likely to have consulted another provider (N=196[39%] vs. N=173[19%]) than non-VH-  
80 parents, to express less satisfaction with both their primary (N=342[82%] vs. N=586[91%])  
81 and other providers (N=82[42%] vs. N=142[82%]), and less trust in their primary  
82 (N=368[88%] vs. N=632[98%]) and other providers (N=108[55%] vs. N=146[84%]). VH-  
83 parents were less likely to be satisfied with their biomedical primary provider than non-VH-

84 parents (100[69%] vs. 467[91%]). However, when the primary provider was CAM-oriented,  
 85 there were similar levels of satisfaction among both groups (237[89%] VH-parents vs.  
 86 118[89%] non-VH-parents). All differences were significant ( $p < 0.05$ ).

## 87 Conclusions

88 While the provider remains the main information source, VH parents turn to additional  
 89 sources and providers, which is likely related to VH parents being rather dissatisfied with and  
 90 distrusting in obtained information and their provider.

91

## 92 Registry

93 The local ethics committee (Ethikkommission Nordwest- und Zentralschweiz, EKNZ; project  
 94 ID number 2017– 00725) approved the study.

95

## 96 Strengths and weaknesses of the study

| Strengths                                                                                                                                                                                                                                           | Limitations                                                                       |
|-----------------------------------------------------------------------------------------------------------------------------------------------------------------------------------------------------------------------------------------------------|-----------------------------------------------------------------------------------|
| The mixed-methods design brought added value to our study, as this allowed us to address qualitatively documented phenomena and then systematically analyze them on a larger scale.                                                                 | The quantitative survey was not administered to a random sample.                  |
| Our recruitment strategy explicitly oversampled CAM providers and parents consulting them, which allowed us to compare the patient-provider relationship and patient-provider vaccine perspectives for parents seeing CAM vs. biomedical providers. | Our provider sample was recruited through personal contacts and snowball sampling |
| We consider the transdisciplinary research to be a distinct advantage.                                                                                                                                                                              |                                                                                   |

97

98

## 99 1. Introduction

100 The growing body of literature on vaccine hesitancy (VH) points to the multifaceted and  
101 complex nature of vaccination decision-making [1, 2]. Most parents – whether vaccine-  
102 accepting or VH – obtain their vaccine information primarily from healthcare professionals,  
103 with the most cited source being pediatricians, followed by other healthcare professionals,  
104 such as midwives, nurses, and other therapists [3, 4, 5]. As healthcare providers are the main  
105 source of information for parental decision-making, issues around satisfaction with and trust  
106 in the provider are important to understand. Previous research has shown how trusting  
107 relationships between patients and providers are determinative in parents' vaccination  
108 decision-making, meaning that parents who trust their providers tend to trust their vaccination  
109 recommendations [6, 7, 8]. In Switzerland, *complementary and alternative medicine (CAM)* is  
110 widely used and integrated into the healthcare system [9, 10]. Particularly in primary  
111 healthcare for children, CAM is mainly provided by biomedically trained physicians with  
112 additional CAM training in the sense of integrative medicine [11]. Researchers have  
113 established associations between VH and CAM use [6, 12, 13], and suggested that CAM  
114 providers and VH parents have a "symbiotic" relationship, meaning that "VH and CAM exist  
115 and function separately, but when combined, provide each other with 'resources' that enable  
116 them to thrive together" [12, p. 111]. Others have shown that VH individuals have lower  
117 levels of trust in biomedicine than in CAM [12, 14].

118 In addition to medical providers, sources of vaccination information include parents'  
119 social networks, with similar views and norms being shared within networks. Generally,  
120 parents with people in their networks who vaccinate less are also less likely to vaccinate [15,  
121 16]. Social media and the Internet offer platforms for disseminating information and thus  
122 serve as popular vaccination information sources with its own complexities and dynamics [17,  
123 18, 19]. Testimonies of (negative) experiences during and after vaccination or the usage of  
124 forums are believed to be particularly appealing to parents seeking vaccination information



1  
2  
3 125 [20, 21]. In the last two decades, patient-provider dynamics have partially changed from the  
4  
5 126 former *doctor-provides-patient* to today's *users-provide-users* (i.e., patients no longer obtain  
6  
7 127 their information only from the doctors who treat them, but doctors as well as lay people  
8  
9  
10 128 frequently disseminate information about health and illness on the Internet, which is available  
11  
12 129 to all other users), with health-information seeking audiences being potentially far larger, and  
13  
14 130 everyone with Internet access being capable of disseminating information [20, 22]. This  
15  
16  
17 131 context is further complicated with negative, emotion-focused, and often untrue vaccination  
18  
19 132 information being difficult to debunk with medical facts [21].

20  
21 133 Research consistently shows how trust in and satisfaction with providers who promote  
22  
23 134 vaccination increases parental vaccine acceptance, while parents being misunderstood,  
24  
25 135 criticized, or alienated when expressing VH in clinical interactions can have a negative impact  
26  
27 136 on vaccination acceptance [8]. Ceasing to consult with a health care provider [23, 24] and,  
28  
29 137 related, the phenomenon of doctor “shopping” (which we refer to as *browsing*) [25], have  
30  
31 138 previously been described as important expressions of patient dissatisfaction. Some of our  
32  
33 139 qualitative data analysis has particularly demonstrated how issues of trust, satisfaction, affect,  
34  
35 140 and choice played determinative roles, not only in parents’ vaccination decisions, but also in  
36  
37 141 the types of vaccination sources and the choices of healthcare practitioners (i.e., biomedical or  
38  
39 142 CAM) with whom they consult for their children’s cares [24]. The nuances of CAM  
40  
41 143 vaccination counselling resulting in higher trust and satisfaction most likely lie within these  
42  
43 144 providers taking time for discussion, incorporating parents into decision-making, and taking  
44  
45 145 parents’ concerns seriously [26].

46  
47 146 In this mixed-methods study, we examined the extent to which trust in and satisfaction  
48  
49 147 with vaccination information sources, and in particular the health care provider as the main  
50  
51 148 source of information, differs between VH and non-VH parents and how this affects the  
52  
53 149 parental vaccination decision-making.  
54  
55  
56  
57  
58  
59  
60

## 151 2. Material and methods

### 152 2.1. Study design and population

153 This study is part of a national transdisciplinary investigation into vaccination decision-  
154 making in Switzerland [27]. We employed a mixed-methods approach with *sequential*  
155 *exploratory design*, meaning that an initial qualitative component informed the design of a  
156 subsequent quantitative stage [28]. First, we analyzed the qualitative results by identifying  
157 key areas that seemed to be of central importance. We then focused on these when compiling  
158 the quantitative questionnaires. The detailed analysis of qualitative and quantitative results  
159 was finally done in parallel by presenting a clustering of similar statements in the qualitative  
160 sector, followed by quantitative results showing similar dynamics on a larger scale. We  
161 interviewed parents throughout German, French and Italian-speaking Switzerland. The  
162 French-speaking part, with approximately 23% of the Swiss population and about 19% of our  
163 parental study sample, was slightly underrepresented, and the Italian part was slightly  
164 overrepresented (8% of the Swiss population and 18% of study parents) [29, 30]. At the time  
165 of the survey, the interviewed parent was  $\geq 18$  years of age and their child was 0-11 years old.  
166 We asked parents to provide us with a copy of their children's vaccination record.

### 167 2.2. Patient and public involvement

168 Given the presumably large number of people who are not to be regarded as vaccine  
169 opponents but as vaccine hesitant, we meant to employ a specific focus on the path to  
170 decision-making with all the thought processes, worries and fears contained therein, as well as  
171 the influence of external information. During our qualitative research period, various starting  
172 points emerged that were worth investigating on a larger scale (in the quantitative sector). We  
173 recruited participating parents from a network of 86 biomedical and 44 CAM providers  
174 participating in the project. Participants who indicated they wished to receive the study results  
175 will receive notifications once results are published.

176

### 177 2.3. *Qualitative data collection and analysis*

178 We first conducted semi-structured in-depth interviews with parents from September 2017  
179 to February 2018 and with biomedically-only trained doctors and providers (i.e., physicians or  
180 non-physician-providers) with additional CAM training from August 2017 to September  
181 2018. Interviews aimed to better understand parents' vaccination decision-making processes  
182 and their interactions with health care providers. An interview guide was piloted and revisited  
183 iteratively for clarity. We also conducted ethnographic observations of vaccination  
184 consultations. Qualitative interviews were audio-recorded and transcribed verbatim.

185 **Supplementary Questionnaire S1 and Supplementary Questionnaire S2** contain the  
186 interview guides for the qualitative parental and provider interviews, respectively. Interviews  
187 allowed us to gather background information about parents and their providers and  
188 perspectives on vaccination. Vaccination consultation observations were documented in field  
189 journals and then subsequently written into narrative accounts. Qualitative data were analyzed  
190 by MD and AB. Analysis of the qualitative interviews and observations were guided by the  
191 Framework Method [31] with support of MAXQDA software.

### 192 2.4. *Quantitative data collection and analysis*

193 For the study's quantitative component, we recruited parents in waiting rooms of  
194 participating providers' offices [27]. We refer to these providers as the *primary providers*.  
195 The questionnaire, however, was administered during a telephone interview conducted after  
196 office hours from January 2019 to April 2020 [27]. The latter included the *Parent Attitudes*  
197 *about Childhood Vaccines (PACV)* survey score, a validated instrument that was designed by  
198 Opel and colleagues in order to identify VH parents [32, 33, 34]. The 2011 Opel-revised 15-  
199 item PACV [33] results in a score of 0-100 points. If a parent scores  $\leq 49$  points, they are  
200 considered non-VH; if they score  $\geq 50$  points, they are considered VH. Based upon the results  
201 of a study validating a 5-item version of the PACV in Switzerland with identical scoring [30],  
202 we opted for the shorter 5-item version for our analyses. The final questionnaire included

1  
2  
3 203 PACV items, questions gathering sociodemographic information about the parents and the  
4  
5 204 target child, and additional questions informed by our previously published qualitative  
6  
7 205 research investigating CAM provider approaches to vaccination consultations [26] ,  
8  
9 206 biomedical provider descriptions of interactions with VH parents and dilemmas faced when  
10  
11 207 addressing vaccine hesitancy and refusal [35], and VH parents' navigation of information  
12  
13 208 sources and consultations with CAM and biomedical providers [24]. These qualitative studies  
14  
15 209 informed the design of several components of the quantitative survey, particularly including  
16  
17 210 questions on the parent-provider relationship and vaccination information sources. The  
18  
19 211 quantitative questionnaire is provided in **Supplementary Questionnaire S3**.

22  
23  
24 212 A key question posed to parents was "What are your most trusted information sources on  
25  
26 213 vaccination?" to which a series of pre-established response options were made available (e.g.,  
27  
28 214 "Internet".) We invited participants to provide additional information through open-answer  
29  
30 215 responses (e.g., "Which websites?"). The number of sources mentioned by each participant  
31  
32 216 was analyzed by coding and counting the reported sources, as well as the free-text answers.

33  
34  
35 217 We use descriptive statistics plus Pearson's Chi-squared and Wilcoxon Rank Sum tests to  
36  
37 218 test whether observed differences between non-VH and VH parent participants are significant  
38  
39 219 at the  $p < 0.05$  level. Quantitative data analysis was performed by SE and KJ using STATA  
40  
41 220 software version 12.1 (Stata corporation, College Station TX). We personally reviewed the  
42  
43 221 information sources cited by parents and, after consultation within the team, we decided  
44  
45 222 whether to consider each source as critical or accepting of the official vaccination  
46  
47 223 recommendations.

#### 51 224 *2.5. Ethical considerations*

52  
53  
54 225 This study was conducted in compliance with the Swiss Federal Act on Research  
55  
56 226 Involving Human Beings (Human Research Act) and the Declaration of Helsinki. The local  
57  
58 227 ethics committee (Ethikkommission Nordwest- und Zentralschweiz, EKNZ; project ID  
59  
60 228 number 2017– 00725) approved the study. We obtained written informed consent from each

1  
2  
3  
4  
5  
6  
7  
8  
9  
10  
11  
12  
13  
14  
15  
16  
17  
18  
19  
20  
21  
22  
23  
24  
25  
26  
27  
28  
29  
30  
31  
32  
33  
34  
35  
36  
37  
38  
39  
40  
41  
42  
43  
44  
45  
46  
47  
48  
49  
50  
51  
52  
53  
54  
55  
56  
57  
58  
59  
60

229 participant after the nature and possible consequences of the study had been fully explained.

230 Pseudonyms are used for participants throughout. Direct quotes were translated from the

231 original language of utterance (German, French) into English.

232

For peer review only

1  
2  
3 233 **3. Results**  
4

5 234 *3.1. Study population*  
6

7 235 For the qualitative study component, we conducted ethnographic observations of 34  
8  
9  
10 236 pediatric vaccination consultations. We also conducted in-depth, face-to-face interviews with  
11  
12 237 30 parents and 37 providers. Among the provider-interviewees, 20 were biomedically  
13  
14 238 oriented physicians and 17 were CAM-oriented providers, of which 15 were biomedically  
15  
16 239 trained physicians with additional training in CAM, and 2 were non-physician CAM  
17  
18 240 providers.  
19

20  
21 241 For the research program's quantitative component, (i.e., both the childhood vaccines and  
22  
23 242 HPV samples [27]), we completed a full telephone interview with 1,390 parents and 130 (86  
24  
25 243 biomedically- and 44 CAM-oriented) primary providers. 889 (64%) parents had a PACV score  
26  
27 244 of  $\leq 49$ , indicating non-VH, and 501 (36%) parents had a PACV score of  $\geq 50$ , indicating VH.  
28  
29 245 Parent characteristics are shown in **Table 1**. VH parents were more likely to see a CAM-  
30  
31 246 oriented primary provider than non-VH parents (307 [61%] vs. 183 [21%];  $p < 0.001$ ).  
32  
33  
34

35 247  
36  
37  
38  
39  
40  
41  
42  
43  
44  
45  
46  
47  
48  
49  
50  
51  
52  
53  
54  
55  
56  
57  
58  
59  
60

**Table 1.** Characteristics of the quantitative study population

|                              | All parents<br>(N=1390) |  | By PACV-score             |                       | P value             |
|------------------------------|-------------------------|--|---------------------------|-----------------------|---------------------|
|                              |                         |  | Non-VH parents<br>(N=889) | VH parents<br>(N=501) |                     |
|                              | N (%)                   |  | N (%)                     | N (%)                 |                     |
| Female Respondent            | 1232 (89%)              |  | 798 (90)                  | 434 (87)              | 0.141 <sup>1</sup>  |
| Relationship to child        |                         |  |                           |                       | 0.095 <sup>1</sup>  |
| Mother                       | 1228 (88)               |  | 797 (90)                  | 431 (86)              |                     |
| Father                       | 155 (11)                |  | 89 (10)                   | 66 (13)               |                     |
| Other                        | 7 (1)                   |  | 3 (0)                     | 4 (1)                 |                     |
| Interviewee Age (Mean (SD))  | 37.1 (6.27)             |  | 37 (6.16)                 | 37.2 (6.46)           | 0.592 <sup>2</sup>  |
| Born in Switzerland          | 981 (71)                |  | 608 (68)                  | 373 (74)              | 0.059 <sup>1</sup>  |
| Parent's highest education   |                         |  |                           |                       | <0.001 <sup>1</sup> |
| Low <sup>3</sup>             | 272 (20)                |  | 188 (21)                  | 84 (17)               |                     |
| Medium <sup>4</sup>          | 321 (23)                |  | 209 (24)                  | 112 (22)              |                     |
| Bachelors <sup>5</sup>       | 285 (21)                |  | 163 (18)                  | 122 (24)              |                     |
| Masters                      | 358 (26)                |  | 226 (25)                  | 132 (26)              |                     |
| Doctorate                    | 105 (8)                 |  | 81 (9)                    | 24 (5)                |                     |
| Other, missing               | 49 (4)                  |  | 22 (2)                    | 27 (5)                |                     |
| Household income             |                         |  |                           |                       | <0.001 <sup>1</sup> |
| < 80,000 Swiss Francs (CHF)  | 319 (23)                |  | 174 (20)                  | 145 (29)              |                     |
| 80,000 – 120,000 CHF         | 384 (28)                |  | 225 (25)                  | 159 (32)              |                     |
| > 120,000 CHF                | 279 (20)                |  | 195 (22)                  | 84 (17)               |                     |
| Missing, declined to respond | 408 (29)                |  | 295 (33)                  | 113 (23)              |                     |
| Type of primary provider     |                         |  |                           |                       | <0.001 <sup>1</sup> |
| Biomedical                   | 893 (64)                |  | 705 (79)                  | 188 (38)              |                     |
| CAM                          | 490 (35)                |  | 183 (21)                  | 307 (61)              |                     |
| Missing                      | 7 (1)                   |  | 1 (0)                     | 6 (1)                 |                     |

**Note.** <sup>1</sup>Pearson's Chi-squared and <sup>2</sup>Wilcoxon Rank Sum tests were used for statistical analysis. <sup>3</sup>Secondary school not completed, no completed professional education, completed 9 years of school without further education, apprenticeship, technical school or business school; <sup>4</sup>College, higher professional school; <sup>5</sup>Bachelor at University, primary school teacher seminar.

248

### 249 3.1 Variety of information sources on vaccination

250 During our qualitative interviews and observations of vaccination consultations, parents

251 cited a broad array of vaccination information sources as part of their decision-making

252 process. Many VH parents engaged in what we refer to as *information browsing*, which

253 involves parents comparing and weighing different information sources while striving to

254 reach certainty about the right vaccination decision to make for their children. For example,

255 Mrs. Sandoz, a 35-year-old mother of a 13-month-old unvaccinated son explained her

256 decision not to vaccinate:

257 “I think it was a mix of discussions with people close to us and with friends. [...]

258 There is my personal feeling about the matter. There is certainly the social influence

259 from my husband. I'll say that the decision surely came more from me than it did from

260 him. I think I hold the decision closer to my heart than he does. I think it was kind of a

1  
2  
3 261 vague questioning. There were some things I read on the Internet. I joined Facebook  
4  
5 262 groups where they talk about it. I read some testimonies. I think when I was pregnant,  
6  
7 263 I had a discussion with the [CAM] pediatrician in order to know the true risks that we  
8  
9 264 were taking if we didn't vaccinate. I was looking for the most neutral point of view  
10  
11 265 possible. [...] For now, it's a decision that is in favor of not vaccinating.”

12  
13  
14 266 Other VH parents explained how having multiple sources of information reassured them  
15  
16 267 that they were taking the correct course of action for their families.

17  
18  
19 268 Qualitative results additionally shed light on parents, often VH parents, having consulted a  
20  
21 269 multitude of sources that varied in both format and content. Parents described how each piece  
22  
23 270 of information could temporarily solidify their opinion, but also raise further doubts and  
24  
25 271 uncertainties. Mrs. Sandoz explained:

26  
27  
28 272 “We have a lot of doubts around the benefits of vaccines. My husband and I are still  
29  
30 273 reading about it and continue to have discussions and thinking about it in order to be  
31  
32 274 comfortable. [...]. We have so much information that we can get lost in it. [...] Up  
33  
34 275 until now, everything that I've read and the discussions that I've had have reinforced  
35  
36 276 our decision to not vaccinate our son.”

37  
38  
39 277 VH parents described how a multitude of information sources could be both a source of  
40  
41 278 reassurance and of hesitancy in their quest for neutral information about vaccination. We  
42  
43 279 therefore investigated the potential association of VH with the number and trustworthiness of  
44  
45 280 parents' vaccination information sources by including the question “What are your most  
46  
47 281 trusted information sources on vaccination?” in the quantitative questionnaire.

48  
49  
50 282 **Figure 1** illustrates how the number of trusted information sources varied between VH  
51  
52 283 and non-VH parents. VH parents reported using more sources on average than non-VH  
53  
54 284 parents (2.98 [SD=2.02] vs. 2.70 [SD=1.83]). While small, the difference was significant  
55  
56 285 (p=0.012).

57  
58  
59  
60 286



1  
2  
3 **287 [Figure 1]**  
4

5 288  
6

7  
8 289 *3.2 Types of information sources and media*  
9

10 290 Based on our initial qualitative research, we generated a preliminary list of information  
11  
12 291 source types which we then included in the quantitative questionnaire. Commonly mentioned  
13  
14 292 information sources included the child's doctor and other providers, family, friends and  
15  
16 293 acquaintances, official public health recommendations, print media, such as books or  
17  
18 294 newspaper articles, the Internet, and social media.  
19

20  
21 295 In **Table 2** we list the trusted vaccination information sources cited most by parents. The  
22  
23 296 child's doctor was the information source cited most (1113 [80%] parents) by both VH and  
24  
25 297 non-VH parents, but VH parents were less likely to report the child's doctor as the most  
26  
27 298 trusted source than non-VH parents (358 [71%] vs. 755 [85%];  $p<0.001$ ). VH parents were  
28  
29 299 also less likely to report public health authorities as a trusted information source than non-VH  
30  
31 300 parents (101 [20%] vs. 333 [37%];  $p<0.001$ ), as well as information materials that are  
32  
33 301 consistent with the official vaccination recommendation (26 [5%] vs. 74 [8%];  $p=0.03$ ).  
34  
35

36  
37 302 In contrast, VH parents tended to mention information sources other than the child's  
38  
39 303 doctor or public health authorities more than non-VH parents, including social networks (215  
40  
41 304 [43%] vs. 253 [28%];  $p<0.001$ ), other health care workers (105 [21%] vs. 119 [13%];  
42  
43 305  $p<0.001$ ) and their personal gut feelings or experiences (16 [3%] vs. 10 [1%];  $p=0.006$ ). The  
44  
45 306 largest difference we identified involved information materials, such as books, online or print  
46  
47 307 magazines, and websites that are critical of official vaccination recommendations (105 VH  
48  
49 308 parents [21%] vs. 4 non-VH parents [0%];  $p<0.001$ ), and materials of obvious CAM nature  
50  
51 309 (12 VH parents [2%] vs. 0 non-VH parents [0%];  $p<0.001$ ).  
52  
53

54 310  
55

56 311  
57

58 312  
59  
60

**Table 2.** Types of trusted vaccination information sources.

|                                                                                          | All parents<br>(N=1390) |          | By PACV-score             |        | P value |
|------------------------------------------------------------------------------------------|-------------------------|----------|---------------------------|--------|---------|
|                                                                                          |                         |          | Non-VH parents<br>(N=889) |        |         |
|                                                                                          | N (%)                   | N (%)    | N (%)                     |        |         |
| My child's doctor                                                                        | 1113 (80)               | 755 (85) | 358 (71)                  | <0.001 |         |
| Social networks <sup>1</sup>                                                             | 468 (34)                | 253 (28) | 215 (43)                  | <0.001 |         |
| Public Health Authorities                                                                | 434 (31)                | 333 (37) | 101 (20)                  | <0.001 |         |
| Other health care workers                                                                | 224 (16)                | 119 (13) | 105 (21)                  | <0.001 |         |
| Other physician                                                                          | 195 (14)                | 111 (12) | 84 (17)                   | 0.027  |         |
| CAM                                                                                      | 19 (1)                  | 3 (0)    | 16 (3)                    | <0.001 |         |
| Homeopathic                                                                              | 12 (1)                  | 2 (0)    | 10 (2)                    | 0.001  |         |
| Midwife                                                                                  | 13 (1)                  | 4 (0)    | 9 (2)                     | 0.268  |         |
| Materials that are critical of public health vaccination recommendation <sup>2</sup>     | 109 (8)                 | 4 (0)    | 105 (21)                  | <0.001 |         |
| "Foundation for consumer protection"                                                     | 22 (2)                  | 3 (0)    | 19 (4)                    | <0.001 |         |
| Hirte: "Impfen Pro & Contra"                                                             | 15 (1)                  | 0 (0)    | 15 (3)                    | <0.001 |         |
| Explicitly CAM materials                                                                 | 12 (1)                  | 0 (0)    | 12 (2)                    | <0.001 |         |
| Berthoud: "Qui aime bien vaccine peu"                                                    | 9 (1)                   | 0 (0)    | 9 (2)                     | <0.001 |         |
| Glöckler/Goebel/Michael: "Kindersprechstunde"                                            | 6 (0)                   | 0 (0)    | 6 (1)                     | 0.001  |         |
| "www.impfo.ch"                                                                           | 5 (0)                   | 2 (0)    | 3 (1)                     | 0.264  |         |
| Materials that are consistent with public health vaccination recommendation <sup>2</sup> | 100 (7)                 | 74 (8)   | 26 (5)                    | 0.030  |         |
| "www.swissmom.ch"                                                                        | 20 (1)                  | 16 (2)   | 4 (1)                     | 0.132  |         |
| "Wir Eltern"                                                                             | 8 (1)                   | 7 (1)    | 1 (0)                     | 0.164  |         |
| "Beobachter"                                                                             | 6 (0)                   | 2 (0)    | 4 (1)                     | 0.117  |         |
| "Puls"                                                                                   | 6 (0)                   | 4 (0)    | 2 (0)                     | 0.890  |         |
| Google                                                                                   | 98 (7)                  | 78 (9)   | 20 (4)                    | 0.001  |         |
| Scientific literature <sup>4</sup>                                                       | 55 (4)                  | 37 (4)   | 18 (4)                    | 0.601  |         |
| No source, missing, don't know, don't want to disclose                                   | 49 (4)                  | 26 (3)   | 23 (5)                    | 0.106  |         |
| Medical work experience <sup>3</sup>                                                     | 42 (3)                  | 30 (3)   | 12 (2)                    | 0.306  |         |
| Nurse                                                                                    | 8 (1)                   | 6 (1)    | 2 (0)                     | 0.514  |         |
| News                                                                                     | 31 (2)                  | 22 (2)   | 9 (2)                     | 0.411  |         |
| Personal experience, gut feeling                                                         | 26 (2)                  | 10 (1)   | 16 (3)                    | 0.006  |         |
| Described as neutral                                                                     | 9 (1)                   | 0 (0)    | 9 (2)                     | <0.001 |         |

**Note.** <sup>1</sup>Family, friends, and acquaintances; <sup>2</sup>Print media, websites, organizations, TV programs, and films that are critical of or consistent with public health vaccination recommendations based on our detailed assessment and on consensus among research team members; <sup>3</sup>Medical, biological, or pharmaceutical training or work experience of the interviewee or the other parent of the target child; <sup>4</sup>As stated by the interviewee. Pearson's Chi-squared tests were used for statistical analysis.

313

314 In **Table 3**, we list where parents reported having obtained trusted information about  
315 vaccination. We list all information channels reported by at least 5 parents. The Internet was  
316 considered the most trustworthy medium by VH parents and non-VH parents in similar  
317 proportions (176 [35%] vs. 299 [34%]; p=0.572). However, VH parents cited print media as  
318 their most trusted medium of vaccination information more frequently than non-VH parents  
319 (237 [47%] vs. 176 [20%]; p<0.001), including books and brochures (129 [26%] vs. 63 [7%];  
320 p<0.001). With regards to specific internet sources, VH parents were less likely to report

321 Google than non-VH parents (20 [4%] vs. 78 [9%];  $p=0.001$ ) as a trusted medium for  
 322 vaccination information. VH parents were more likely than non-VH parents to cite social  
 323 media (26 [5%] vs. 21 [2%];  $p=0.005$ ), although overall few parents in either group cited this  
 324 as a trusted information source.

325 **Table 3.** Types of trusted media for vaccination information

|                         | All parents<br>(N=1390) |          | By PACV-score             |                       | P value |
|-------------------------|-------------------------|----------|---------------------------|-----------------------|---------|
|                         |                         |          | Non-VH parents<br>(N=889) | VH parents<br>(N=501) |         |
|                         | N (%)                   | N (%)    | N (%)                     | N (%)                 |         |
| Internet                | 475 (34)                | 299 (34) | 176 (35)                  | 0.572                 |         |
| Google                  | 98 (7)                  | 78 (9)   | 20 (4)                    | 0.001                 |         |
| Social media            | 47 (3)                  | 21 (2)   | 26 (5)                    | 0.005                 |         |
| Facebook                | 17 (1)                  | 7 (1)    | 10 (2)                    | 0.490                 |         |
| Print media             | 413 (30)                | 176 (20) | 237 (47)                  | <0.001                |         |
| Books and brochures     | 192 (14)                | 63 (7)   | 129 (26)                  | <0.001                |         |
| Magazine and newspapers | 60 (4)                  | 42 (5)   | 18 (4)                    | 0.319                 |         |
| TV                      | 67 (5)                  | 37 (4)   | 30 (6)                    | 0.127                 |         |
| Films                   | 13 (1)                  | 1 (0)    | 12 (2)                    | <0.001                |         |
| Conferences             | 9 (1)                   | 2 (0)    | 7 (1)                     | 0.150                 |         |

328 **Note.** Pearson's Chi-squared tests were used for statistical analysis.

### 330 3.3 Satisfaction with and trust in the primary provider

331 Our qualitative findings revealed an understudied phenomenon in Switzerland – parents  
 332 switching providers for their children's care around the issue of vaccination – and suggested  
 333 that this switch was often made from biomedical-oriented physicians to those trained in CAM  
 334 [24]. Quantitative results suggest that more VH parents than non-VH parents consulted  
 335 providers other than the child's primary provider when making vaccination decisions, as can  
 336 be seen below. We therefore explored whether this information seeking behavior is related to  
 337 issues of (dis)satisfaction with and (dis)trust in the primary provider.

338 Qualitative evidence particularly showed the saliency of the issue of trust for parents in  
 339 their vaccination decision-making process. The following excerpt from an interview with Mrs.  
 340 Godet, a 29-year-old mother of a 13-month-old fully vaccinated daughter illustrates how,  
 341 despite the mother's media-induced uncertainty about her vaccination decision, trust in the  
 342 provider was crucial for her to follow the provider's recommendation:

1  
2  
3 343 “There are a lot of so-called 'scientific' studies which have come out with  
4  
5 344 consequences that vaccines might have on children's health. [...]. And so it's  
6  
7  
8 345 very hard to know who to believe, actually. [...]. So, we trust, anyway. Well, I  
9  
10 346 trust my pediatrician. So, if she tells me that I have to vaccinate, I think that's  
11  
12 347 good. Now, it's true that if you read a little bit of what's on the Internet and  
13  
14  
15 348 everything, you don't really know what to do.”

16  
17 349 Providers also discussed how they fostered trust as part of their clinical practice. Dr.  
18  
19 350 Heffelfinger, an anthroposophic physician, explained how he thought his practices differed  
20  
21 351 from those of a biomedically oriented pediatrician:

22  
23  
24 352 “I try to take much more time and try to make something out of the time. To gain trust,  
25  
26 353 to create insight to the subject. [...]. To me, the free decision to vaccinate is the top  
27  
28 354 priority. The decision belongs to the human being that decides for himself or herself.”

29  
30 355 **Figure 2 and Supplementary Table S1** show how VH parents were more likely to have  
31  
32 356 discussed vaccination with their primary provider than non-VH parents (418 [83%] vs. 645  
33  
34 357 [73%];  $p < 0.001$ ). VH parents were less likely to be satisfied with and to trust their primary  
35  
36 358 provider than non-VH parents (satisfaction: 342 [82%] vs. 586 [91%]; trust: 368 [88%] vs.  
37  
38 359 632 [98%];  $p < 0.001$  for both satisfaction and trust). When their primary provider was  
39  
40 360 biomedically oriented, this difference was even more notable (satisfaction: 100 [69%] vs. 467  
41  
42 361 [91%]; trust: 120 [83%] vs. 503 [98%];  $p < 0.001$  for both satisfaction and trust). In contrast,  
43  
44 362 when the primary provider was CAM-oriented, there was no significant difference in  
45  
46 363 satisfaction and trust for VH and non-VH parents (satisfaction: 237 [89%] vs. 118 [89%];  
47  
48 364 trust: 243 [91%] vs. 128 [96%];  $p = 0.395$  and  $p = 0.164$ , respectively).

49  
50 365 To evaluate issues of (dis)satisfaction and (dis)trust, we analyzed parents' responses  
51  
52 366 regarding perceived agreement between their own vaccination view and their primary  
53  
54 367 provider's view. VH parents reported significantly lower agreement between their own  
55  
56 368 vaccination view and their child's doctor perceived view than non-VH parents (271 [65%] vs.

1  
2  
3 369 567 [88%];  $p < 0.001$ ). The gap between parent and provider views was larger when the  
4  
5 370 primary provider was biomedically oriented (79 [54%] VH parents vs. 449 [88%] non-VH  
6  
7 371 parents;  $p < 0.001$ ) and smaller when the primary provider was CAM-oriented (188 [70%] VH  
8  
9 372 parents vs. 117 [88%] non-VH parents;  $p = 0.001$ ).  
10  
11  
12 373

13  
14 374 **[Figure 2]**

15  
16 375  
17  
18 376 *3.4 Seeking multiple provider opinions on vaccination*

19 377 Given the important role children's doctors play in influencing parents' vaccination  
20  
21 378 decisions, we further explored a phenomenon that our initial qualitative work brought to light –  
22  
23 379 parents consulting with and/or switching from one to another provider, often to one offering  
24  
25 380 CAM services, in response to issues arising during vaccination consultations [24], a  
26  
27 381 phenomenon we call *provider browsing*. The following conversation with Mrs. Kugler, a 37-  
28  
29 382 year-old mother of one partially vaccinated child, illustrates this behavior:  
30  
31  
32  
33  
34

35 383 *Researcher:* Ok. I've already seen in the vaccination booklet, there are two or three  
36  
37 384 different doctors that you consult. Do you prefer to see a biomedical provider?

38 385 *Mother:* Well, we actually tend to go to the homeopath. [...]. She's always a little, "I  
39  
40 386 told you so," after every vaccination. But she tolerates it. It takes her two or three  
41  
42 387 weeks until she gets well enough to be neutral towards us again [laughing]. Because  
43  
44 388 we do vaccinate. And [the homeopath] is the one who treats [our daughter] when she's  
45  
46 389 sick. [...]. And if we needed a diagnosis, for example, if I wasn't sure whether it was  
47  
48 390 otitis media or something like that, I used to go see [the local pediatrician]. [...]. He is  
49  
50 391 a classic [biomedical] Algifor-Dafalgan [commonly prescribed pain killers in  
51  
52 392 Switzerland, containing ibuprofen and paracetamol, respectively] doctor.  
53  
54  
55  
56  
57

58 393 *Researcher:* Ok. Purely conventional biomedical?  
59  
60

1  
2  
3 394 *Mother*: Yes, [...]. At every diagnosis. In winter, [my daughter] was very sick again  
4  
5 395 with an extremely high temperature. Again, the remedy was Algifor. The doctor  
6  
7 396 added, ‘We should start vaccinating soon. [...]. It’s a classic fever. We can easily  
8  
9 397 vaccinate. It’s not too bad at this age.’ [...] I felt we were no longer in good hands and  
10  
11 398 switched to Dr. Heffelfinger.

12  
13  
14 399 Qualitative analysis of provider browsing suggested that parents were seeking health care  
15  
16 400 providers who were willing to listen to and understand parents’ rationales around vaccination  
17  
18 401 and their adherence to complementary and alternative approaches to medicine. Dr.  
19  
20 402 Heffelfinger, an anthroposophical doctor, pointed to the practice of listening to and  
21  
22 403 responding to parents’ questions and concerns. He hypothesized why parents might switch to  
23  
24 404 him after seeing a biomedically oriented physician,

25  
26 405 “That style of consultation doesn’t suit them. [...]. The parents don’t feel like they are  
27  
28 406 being taken seriously, or they have many more questions than what they were able to  
29  
30 407 discuss.”

31  
32  
33 408 When asked if parents followed this provider’s vaccination recommendations, he responded  
34  
35 409 affirmatively, noting that parents did not often return to their previous pediatrician,

36  
37 410 “People don’t consult that pediatrician again because the pediatrician was vaccinating  
38  
39 411 insanely. [With me], parents do almost exactly the same vaccines as they would have  
40  
41 412 done with their previous pediatrician. But we talked about them.”

42  
43  
44 413 **Table 4** reports quantitative analysis of this phenomenon showing that more VH parents  
45  
46 414 than non-VH parents reported consulting with a provider other than the primary provider for  
47  
48 415 vaccination questions (196 [39%] vs. 173 [19%];  $p < 0.001$ ). We specifically asked questions  
49  
50 416 about parents’ motivations for consulting with another provider. More VH parents than non-  
51  
52 417 VH parents cited seeking a second opinion or having a disagreement as the reason for  
53  
54 418 consulting with another provider (87 [17%] vs. 38 [4%];  $p < 0.001$ ). Logistical reasons (e.g.,  
55  
56  
57  
58  
59  
60

1  
2  
3 419 parents moved, or provider stopped working) were mentioned with similar frequency (43  
4  
5 420 [9%] among VH parents vs. 68 [8%] among non-VH parents;  $p=0.537$ ).

7  
8 421 Interestingly, among parents who had asked another provider about vaccination, about  
9  
10 422 half as many VH parents as non-VH parents reported satisfaction with and trust in the other  
11  
12 423 provider (satisfaction: 82 [42%] vs. 142 [82%]; trust: 108 [55%] vs. 146 [84%];  $p<0.001$  for  
13  
14 424 both satisfaction and trust).

16  
17 425 Since VH parents report higher satisfaction and trust in CAM-oriented providers, we  
18  
19 426 investigated whether provider browsing varied by type of primary provider (i.e., biomedical  
20  
21 427 or CAM orientation). Among parents with biomedically oriented primary providers, more VH  
22  
23 428 parents than non-VH parents engaged in provider browsing (54 [29%] vs. 129 [18%];  
24  
25 429  $p=0.002$ ). However, this difference was even starker among parents with CAM-oriented  
26  
27  
28 430 primary providers (137 [45%] of VH parents vs. 43 [23%] of non-VH parents;  $p<0.001$ ).

30  
31 431  
32  
33  
34  
35  
36  
37  
38  
39  
40  
41  
42  
43  
44  
45  
46  
47  
48  
49  
50  
51  
52  
53  
54  
55  
56  
57  
58  
59  
60

**Table 4.** Parents having consulted another doctor about vaccination.

|                                                           | <i>All parents</i><br>(N=1390) | <i>By PACV-score</i>             |                              | <i>P value</i>   |
|-----------------------------------------------------------|--------------------------------|----------------------------------|------------------------------|------------------|
|                                                           |                                | <i>Non-VH parents</i><br>(N=889) | <i>VH parents</i><br>(N=501) |                  |
|                                                           | <i>N (%)</i>                   | <i>N (%)</i>                     | <i>N (%)</i>                 |                  |
| <i>Consulted another doctor</i>                           |                                |                                  |                              | <i>&lt;0.001</i> |
| No                                                        | 1012 (73)                      | 712 (80)                         | 300 (60)                     |                  |
| Yes                                                       | 369 (27)                       | 173 (19)                         | 196 (39)                     |                  |
| Missing                                                   | 9 (1)                          | 4 (0)                            | 5 (1)                        |                  |
| <i>Reason for consultation</i>                            |                                |                                  |                              | <i>&lt;0.001</i> |
| Second opinion or disagreement                            | 125 (9)                        | 38 (4)                           | 87 (17)                      |                  |
| Moved or stopped working                                  | 111 (8)                        | 68 (8)                           | 43 (9)                       |                  |
| Other                                                     | 130 (9)                        | 64 (7)                           | 66 (13)                      |                  |
| Missing                                                   | 3 (0)                          | 3 (0)                            | 0 (0)                        |                  |
|                                                           | <i>Total sample</i><br>(N=893) | <i>By PACV-score</i>             |                              |                  |
| <i>Parents with a biomedical primary doctor</i>           |                                | <i>Non-VH parents</i><br>(N=705) | <i>VH parents</i><br>(N=188) | <i>P value</i>   |
|                                                           | <i>N (%)</i>                   | <i>N (%)</i>                     | <i>N (%)</i>                 |                  |
| <i>Consulted another doctor</i>                           |                                |                                  |                              | <i>0.002</i>     |
| No                                                        | 703 (79)                       | 572 (81)                         | 131 (70)                     |                  |
| Yes                                                       | 183 (20)                       | 129 (18)                         | 54 (29)                      |                  |
| Missing                                                   | 7 (1)                          | 4 (1)                            | 3 (2)                        |                  |
| <i>Reason for consultation</i>                            |                                |                                  |                              | <i>0.134</i>     |
| Second opinion or disagreement                            | 46 (5)                         | 27 (4)                           | 19 (10)                      |                  |
| Moved or stopped working                                  | 71 (8)                         | 55 (8)                           | 16 (9)                       |                  |
| Other                                                     | 64 (7)                         | 45 (6)                           | 19 (10)                      |                  |
| Missing                                                   | 2 (0)                          | 2 (0)                            | 0 (0)                        |                  |
|                                                           | <i>Total sample</i><br>(N=490) | <i>By PACV-score</i>             |                              |                  |
| <i>Parents with a CAM primary doctor</i>                  |                                | <i>Non-VH parents</i><br>(N=183) | <i>VH parents</i><br>(N=307) | <i>P value</i>   |
|                                                           | <i>N (%)</i>                   | <i>N (%)</i>                     | <i>N (%)</i>                 |                  |
| <i>Consulted another doctor</i>                           |                                |                                  |                              | <i>&lt;0.001</i> |
| No                                                        | 308 (63)                       | 140 (77)                         | 168 (55)                     |                  |
| Yes                                                       | 180 (37)                       | 43 (23)                          | 137 (45)                     |                  |
| Missing                                                   | 2 (0)                          | 0 (0)                            | 2 (1)                        |                  |
| <i>Reason for consultation</i>                            |                                |                                  |                              | <i>0.014</i>     |
| Second opinion or disagreement                            | 75 (15)                        | 10 (5)                           | 65 (21)                      |                  |
| Moved or stopped working                                  | 40 (8)                         | 13 (7)                           | 27 (9)                       |                  |
| Other                                                     | 64 (13)                        | 19 (10)                          | 45 (15)                      |                  |
| Missing                                                   | 1 (0)                          | 1 (1)                            | 0 (0)                        |                  |
|                                                           | <i>Total sample</i><br>(N=369) | <i>By PACV-score</i>             |                              |                  |
| <i>All parents having consulted another doctor before</i> |                                | <i>Non-VH parents</i><br>(N=173) | <i>VH parents</i><br>(N=196) | <i>P value</i>   |
|                                                           | <i>N (%)</i>                   | <i>N (%)</i>                     | <i>N (%)</i>                 |                  |
| <i>Satisfied<sup>1</sup> with other doctor</i>            | 224 (61)                       | 142 (82)                         | 82 (42)                      | <i>&lt;0.001</i> |
| <i>Trust<sup>3</sup> other doctor</i>                     | 254 (69)                       | 146 (84)                         | 108 (55)                     | <i>&lt;0.001</i> |

**Note.** <sup>1</sup>Satisfied or very satisfied; <sup>2</sup>Somewhat or not at all satisfied; <sup>3</sup>Somewhat or completely. Pearson's Chi-squared tests were used for statistical analysis.

432

433

434

435



## 436 4. Discussion

### 437 4.1. Principal findings

438 Our mixed-methods study has several main findings. First, our results confirm previous  
439 research showing that children's doctors are parents' most important vaccination information  
440 [3, 4, 5, 36]. Similarly, VH participants were more likely to turn to additional information  
441 sources, including their social networks, books, and other materials critical of official  
442 vaccination recommendations [4, 15, 16]. More VH parents than non-VH parents cited print  
443 media as a trusted information source. To our knowledge, this has not been reported on  
444 previously.

445 Second, VH parents expressed lower levels of satisfaction with and trust in their primary  
446 provider, particularly biomedically oriented physicians. This finding is likely associated with  
447 our third main finding showing that VH parents engaged more in provider browsing than non-  
448 VH parents. Nevertheless, VH parents reported lower levels of satisfaction with and trust in  
449 these other providers. VH parents were more likely to consult with CAM-oriented primary  
450 providers and to have higher levels of satisfaction with and trust in CAM than in biomedical  
451 providers. Interestingly, the phenomenon of VH parents having consulted with other  
452 providers about vaccination occurred more when the primary provider was CAM-oriented.

453 Previous research suggests that the relationship between VH and CAM use is not fully  
454 explained by VH individuals' trust in CAM services, but rather by distrust in biomedicine  
455 [14]. Accordingly, we argue that the VH parents in our sample may have been more likely to  
456 be pushed away from biomedicine than pulled toward CAM, as VH parents seemed to switch  
457 providers when they were no longer satisfied with or no longer fully trusted their provider,  
458 therefore substantiating not primarily the attractiveness of the second provider, but rather a  
459 form of dissatisfaction with the initial provider. Whereas low trust in medical providers has  
460 been documented in previous research as characteristics of VH parents [8, 37, 38], VH

1  
2  
3 461 parents' consultations with multiple providers about vaccination has, to our knowledge, not  
4  
5 462 extensively been studied.

6  
7 463 Our results further imply that VH parents' information browsing behaviors are, similarly  
8  
9 464 to provider browsing, an expression of dissatisfaction and distrust. We argue that individuals  
10  
11 465 who are exposed to a variety of information [39], via the Internet [40, 41] or their social  
12  
13 466 networks [16], are likely to harbor concerns or doubts about official vaccination  
14  
15 467 recommendations. Our qualitative data suggest that these doubts may lead VH parents to seek  
16  
17 468 information from additional sources, by consulting a different doctor or reading additional  
18  
19 469 information materials. Reflecting previous findings [37], several parents described how  
20  
21 470 persistent or novel doubts, uncertainty, or dissatisfaction surfaced when they were exposed to  
22  
23 471 new vaccination information.

#### 24 472 *4.2. Strengths and weaknesses in relation to other studies*

25  
26 473 Building upon existing literature, our study provides evidence demonstrating how VH  
27  
28 474 parents can be characterized by their lower levels of satisfaction and trust, and that this may  
29  
30 475 be an important basis for a *vicious circle* of information seeking, dissatisfaction, distrust, and  
31  
32 476 VH, as previous studies have shown the importance of trust when it comes to addressing VH  
33  
34 477 [8, 42, 43]. Furthermore, there is a need to examine decision-making on childhood  
35  
36 478 vaccinations and under-immunization among VH parents in countries where little research  
37  
38 479 has been conducted [1]. It is therefore important that research provides context-specific  
39  
40 480 insights on Switzerland, due particularly to its high CAM use [10] and high rates of VH [27].  
41  
42 481 The focus on Switzerland, the large-scale data on the questions of VH, and the study's mixed-  
43  
44 482 methods approach speak to the novelty of this research.

45  
46 483 That said, this is not a representative, population-based sample and it provides cross-  
47  
48 484 sectional data.

49  
50 485 Future studies could investigate how trust and satisfaction are maintained, gained, or lost  
51  
52 486 over time in consultations between parents and HCPs over time.

### 4.3. *Meaning of the study*

Our results suggest potential intervention possibilities for addressing VH. Since providers remain the number one source of both VH and non-VH parents, we argue that providers can undergo vaccine consultation and communication training to engage more effectively in dialogue about vaccination with patients. Parents, especially VH parents, do not always lack facts but also may lack certainty, trust, and satisfaction toward the information they obtain as well as in their medical provider. Previous literature shows that parents showing reluctance towards childhood vaccination are not necessarily poised to reject vaccination. Such reluctance is rather a result of uncertainty and doubt acquired through conflicting information [26]. It is important that the provider does not hastily label or even exclude those patients, but rather views them as patients with doubts or concerns and with potential for productive dialogue. If hesitant parents' questions are not adequately addressed and concerns are not met with understanding, distrust and dissatisfaction can arise. In these instances, parents may engage in provider browsing, information browsing, and engage in behaviors that might increase their VH.

### 4.4. *Unanswered questions and future research*

Given the current sociocultural tension surrounding the Covid-19 pandemic, a thorough analysis of the underlying factors and potential intervention measures of widespread VH about the SARS-CoV-2 vaccine is needed. It will also be important for researchers to examine how issues of trust and satisfaction around Covid-19 vaccination services might be associated with routine childhood vaccinations and the influenza vaccination.

### **Acknowledgements**

The authors acknowledge the effort and commitment of study participants, study nurse Andrea Kloetzer, L. Suzanne Suggs, and medical students. We thank Mirjam Mäusezahl (Federal Office of Public Health) for insightful discussions.

1  
2  
3 **513 Funding**  
4

5 514 This work was supported by the Swiss National Science Foundation [National research  
6  
7  
8 515 program NRP74] grant number [407440\_167398] and supplementary postdoctoral fellowship  
9  
10 516 funding from the Nora van Meeuwen-Haefliger-Foundation.  
11

12 517  
13

14  
15 **518 Transparency declaration**  
16

17 519 The manuscript is an honest, accurate, and transparent account of the study being reported; no  
18  
19 520 important aspects of the study have been omitted.  
20

21 521  
22

23  
24 **522 Contributors**  
25

26 523 SE and MD co-drafted the manuscript. SE and KJ focused on the quantitative components  
27  
28 524 and MD and AB focused on the qualitative components. SM provided valuable feedback  
29  
30 525 during the writing process. BH, BW and DK gave rich insight into CAM in Switzerland. BH  
31  
32 526 and BW helped establishing the network of CAM providers and gave and insight into  
33  
34 527 pediatrics in Switzerland. AB was part of the gathering of qualitative data and gave valuable  
35  
36 528 feedback during the writing process. RE, JP and JH gathered qualitative data. PT was the head  
37  
38 529 of the entire project. He directed and supervised all operations from start to finish. He also  
39  
40 530 provided important expertise on infectious diseases and internal medicine. All authors read  
41  
42 531 and approved the final manuscript.  
43  
44  
45  
46

47 532  
48

49 **533 Data sharing**  
50

51 534 Raw data supporting the findings of this study are available from the corresponding author  
52  
53 535 (PT) on request.  
54  
55

56 536  
57

58 537  
59

60 538

### 539 **Competing Interest Statement**

540 All authors have completed the ICMJE uniform disclosure form at [www.icmje.org/](http://www.icmje.org/)  
541 [coi\\_disclosure.pdf](#) and declare: all authors had financial support from Swiss National Science  
542 Foundation [National research program NRP74, grant 407440\_167398] and supplementary  
543 postdoctoral fellowship funding from the Nora van Meeuwen-Haefliger-Foundation for the  
544 submitted work; no financial relationships with any organizations that might have an interest  
545 in the submitted work in the previous three years; no other relationships or activities that  
546 could appear to have influenced the submitted work.

547

### 548 **Figure legends**

549 Figure 1. Number of trusted vaccination information sources.

550 Note. Distribution of the number of trusted vaccination information sources. We divided  
551 parents into non-VH and VH according to PACV score  $<$  or  $\geq 50$ . The median, mean (standard  
552 deviation) of information sources was; 2, 2.80 (1.90) for the entire study population  
553 (N=1390); 2, 2.70 (1.83) for the non-VH parents (N=889), and; 3, 2.98 (2.02) for the VH  
554 parents (N=501). Wilcoxon Rank Sum test was used for statistical analysis.

555 Figure 2. Parental satisfaction with and trust in the child's biomedical or CAM primary  
556 provider.

557 Note. <sup>1</sup>Very satisfied or satisfied; <sup>2</sup>Completely or somewhat trust; <sup>3</sup>Completely or somewhat  
558 agree; Percentages refer to the total number of non-VH and VH parent participants; Pearson's  
559 Chi-squared tests were used for statistical analysis.

560

561

562 **References**

- 563 [1] Larson HJ, Jarrett C, Eckersberger E, Smith DMD, Paterson P. Understanding vaccine  
564 hesitancy around vaccines and vaccination from a global perspective: A systematic review of  
565 published literature, 2007–2012. *Vaccine*. 2014;32:2150-9. [10.1016/j.vaccine.2014.01.081](https://doi.org/10.1016/j.vaccine.2014.01.081).
- 566 [2] MacDonald NE. Vaccine hesitancy: Definition, scope and determinants. *Vaccine*.  
567 2015;33:4161-4. <https://doi.org/10.1016/j.vaccine.2015.04.036>.
- 568 [3] Kennedy A, LaVail K, Nowak G, Basket M, Landry S. Confidence about vaccines in the United  
569 States: understanding parents' perceptions. *Health affairs*. 2011;30:1151-9.  
570 <https://doi.org/10.1377/hlthaff.2011.0396>.
- 571 [4] Charron J, Gautier A, Jestin C. Influence of information sources on vaccine hesitancy and  
572 practices. *Médecine et Maladies Infectieuses*. 2020;50:727-33.  
573 <https://doi.org/10.1016/j.medmal.2020.01.010>.
- 574 [5] Freed GL, Clark SJ, Butchart AT, Singer DC, Davis MM. Sources and perceived credibility of  
575 vaccine-safety information for parents. *Pediatrics*. 2011;127:107-12.  
576 <https://doi.org/10.1542/peds.2010-1722P>.
- 577 [6] Dubé E, Laberge C, Guay M, Bramadat P, Roy R, Bettinger JA. Vaccine hesitancy: An  
578 overview. *Human Vaccines & Immunotherapeutics*. 2013;9:1763-73.  
579 <https://doi.org/10.4161/hv.24657>.
- 580 [7] Goold SD, Lipkin Jr M. The doctor–patient relationship: Challenges, opportunities, and  
581 strategies. *Journal of General Internal Medicine*. 1999;14:26-33.  
582 <https://doi.org/10.1046/j.1525-1497.1999.00267.x>.
- 583 [8] Benin AL, Wisler-Scher DJ, Colson E, Shapiro ED, Holmboe ES. Qualitative analysis of  
584 mothers' decision-making about vaccines for infants: the importance of trust. *Pediatrics*.  
585 2006;117:1532-41. <https://doi.org/10.1542/peds.2005-1728>.
- 586 [9] Wolf U, Maxison-Bergemann S, Bornhöft G, Matthiessen PF, Wolf M. Use of complementary  
587 medicine in Switzerland. *Complementary Medicine Research*. 2006;13:4-6.  
588 <https://doi.org/10.1159/000093488>.
- 589 [10] Klein SD, Torchetti L, Frei-Erb M, Wolf U. Usage of complementary medicine in  
590 Switzerland: results of the Swiss health survey 2012 and development since 2007. *PloS one*.  
591 2015;10:e0141985. <https://doi.org/10.1371/journal.pone.0144676>.
- 592 [11] Huber BM, Rodondi P-Y, Wildhaber J. Pediatric integrative medicine is an integral part of  
593 child health care in Switzerland. *Revue Medicale Suisse*. 2020;16:2289-92.
- 594 [12] Attwell K, Ward PR, Meyer SB, Rokkas PJ, Leask J. Do-it-yourself: Vaccine rejection and  
595 complementary and alternative medicine (CAM). *Social Science & Medicine*. 2018;196:106-  
596 14. <https://doi.org/10.1016/j.socscimed.2017.11.022>.
- 597 [13] Cassell JA, Leach M, Poltorak MS, Mercer CH, Iversen A, Fairhead JR. Is the cultural context  
598 of MMR rejection a key to an effective public health discourse? *Public Health*. 2006;120:783-  
599 94. <https://doi.org/10.1016/j.puhe.2006.03.011>.
- 600 [14] Hornsey MJ, Lobera J, Díaz-Catalán C. Vaccine hesitancy is strongly associated with  
601 distrust of conventional medicine, and only weakly associated with trust in alternative  
602 medicine. *Social Science & Medicine*. 2020;255:113019.  
603 <https://doi.org/10.1016/j.socscimed.2020.113019>.
- 604 [15] Reich JA. We are fierce, independent thinkers and intelligent: Social capital and stigma  
605 management among mothers who refuse vaccines. *Social Science & Medicine*.  
606 2018;257:112015. <https://doi.org/10.1016/j.socscimed.2018.10.027>.
- 607 [16] Brunson EK. The impact of social networks on parents' vaccination decisions. *Pediatrics*.  
608 2013;131:e1397-e404. <https://doi.org/10.1542/peds.2012-2452>.

- 1  
2  
3 609 [17] Wilson SL, Wiysonge C. Social media and vaccine hesitancy. *BMJ Global Health*.  
4 610 2020;5:e004206. <http://dx.doi.org/10.1136/bmjgh-2020-004206>.
- 5  
6 611 [18] Vrdelja M, Kraigher A, Verčič D, Kropivnik S. The growing vaccine hesitancy: exploring the  
7 612 influence of the internet. *European Journal of Public Health*. 2018;28:934-9.  
8 613 <https://doi.org/10.1093/eurpub/cky114>.
- 9  
10 614 [19] Johnson NF, Velásquez N, Restrepo NJ, Leahy R, Gabriel N, El Oud S, et al. The online  
11 615 competition between pro-and anti-vaccination views. *Nature*. 2020;582:230-3.  
12 616 <https://doi.org/10.1038/s41586-020-2281-1>.
- 13 617 [20] Dubé E, Gagnon D, Nickels E, Jeram S, Schuster M. Mapping vaccine hesitancy—Country-  
14 618 specific characteristics of a global phenomenon. *Vaccine*. 2014;32:6649-54.  
15 619 <https://doi.org/10.1016/j.vaccine.2014.09.039>.
- 16  
17 620 [21] Kata A. A Postmodern Pandora's Box: Anti-Vaccination Misinformation on the Internet.  
18 621 *Vaccine*. 2010;28:1709-16.
- 19 622 [22] Stahl J, Cohen R, Denis F, Gaudelus J, Martinot A, Lery T, et al. The impact of the web and  
20 623 social networks on vaccination. New challenges and opportunities offered to fight against  
21 624 vaccine hesitancy. *Médecine et Maladies Infectieuses*. 2016;46:117-22.  
22 625 <https://doi.org/10.1016/j.medmal.2016.02.002>.
- 23 626 [23] Hirschman AO. Exit, voice, and loyalty: Responses to decline in firms, organizations, and  
24 627 states: Harvard university press; 1970.
- 25  
26 628 [24] Deml MJ, Buhl A, Huber BM, Burton-Jeangros C, Tarr PE. Trust, affect, and choice in  
27 629 parents' vaccination decision-making and health-care provider selection in Switzerland.  
28 630 *Sociology of Health & Illness*. 2021. <https://doi.org/10.1111/1467-9566.13388>.
- 29 631 [25] Kasteler J, Kane RL, Olsen DM, Thetford C. Issues underlying prevalence of " doctor-  
30 632 shopping" behavior. *Journal of health and social behavior*. 1976;17:328-39.  
31 633 <https://doi.org/10.2307/2136711>.
- 32  
33 634 [26] Deml MJ, Notter J, Kliem P, Buhl A, Huber BM, Pfeiffer C, et al. "We treat humans, not  
34 635 herds!": A qualitative study of complementary and alternative medicine (CAM) providers'  
35 636 individualized approaches to vaccination in Switzerland. *Social Science & Medicine*.  
36 637 2019;240:112556. <https://doi.org/10.1016/j.socscimed.2019.112556>.
- 37  
38 638 [27] Deml MJ, Jafflin K, Merten S, Huber B, Buhl A, Frau E, et al. Determinants of vaccine  
39 639 hesitancy in Switzerland: study protocol of a mixed-methods national research programme.  
40 640 *BMJ open*. 2019;9:e032218. <http://dx.doi.org/10.1136/bmjopen-2019-032218>.
- 41  
42 641 [28] Creswell JW, Clark VLP. Designing and conducting mixed methods research. Thousand  
43 642 Oaks, California: SAGE Publications, Inc.; 2017.
- 44  
45 643 [29] Federal Statistical Office. Main languages of the permanent resident population, 1970-  
46 644 2019. [https://www.bfs.admin.ch/bfs/en/home/statistics/population/languages-  
47 645 religions/languages.html](https://www.bfs.admin.ch/bfs/en/home/statistics/population/languages-religions/languages.html). Last accessed on December 6 2021.
- 48  
49 646 [30] Olarewaju VO, Jafflin K, Deml MJ, Zimmermann C, Sonderegger J, Preda T, et al.  
50 647 Application of the Parent Attitudes about Childhood Vaccines (PACV) survey in three national  
51 648 languages in Switzerland: Exploratory factor analysis and Mokken scale analysis. *Human  
52 649 Vaccines & Immunotherapeutics*. 2021:1-9.  
53 650 <https://doi.org/10.1080/21645515.2021.1894894>.
- 54  
55 651 [31] Gale NK, Heath G, Cameron E, Rashid S, Redwood S. Using the framework method for the  
56 652 analysis of qualitative data in multi-disciplinary health research. *BMC Medical Research  
57 653 Methodology*. 2013;13:1-8. <https://doi.org/10.1186/1471-2288-13-117>.
- 58  
59 654 [32] Opel DJ, Mangione-Smith R, Taylor JA, Korfiatis C, Wiese C, Catz S, et al. Development of  
60 655 a survey to identify vaccine-hesitant parents: The parent attitudes about childhood vaccines  
656 656 survey. *Human Vaccines*. 2011;7:419-25. <https://doi.org/10.4161/hv.7.4.14120>.

- 1  
2  
3 657 [33] Opel DJ, Taylor JA, Mangione-Smith R, Solomon C, Zhao C, Catz S, et al. Validity and  
4 658 reliability of a survey to identify vaccine-hesitant parents. *Vaccine*. 2011;29:6598-605.  
5 659 10.1016/j.vaccine.2011.06.115.  
6  
7 660 [34] Opel DJ, Taylor JA, Zhou C, Catz S, Myaing M, Mangione-Smith R. The relationship  
8 661 between parent attitudes about childhood vaccines survey scores and future child  
9 662 immunization status: A validation study. *JAMA Pediatrics*. 2013;167:1065-71.  
10 663 10.1001/jamapediatrics.2013.2483.  
11  
12 664 [35] Deml MJ, Buhl A, Notter J, Kliem P, Huber BM, Pfeiffer C, et al. 'Problem patients and  
13 665 physicians' failures': What it means for doctors to counsel vaccine hesitant patients in  
14 666 Switzerland. *Social Science & Medicine*. 2020;255:112946.  
15 667 <https://doi.org/10.1016/j.socscimed.2020.112946>.  
16  
17 668 [36] Giambi C, Fabiani M, D'Ancona F, Ferrara L, Fiacchini D, Gallo T, et al. Parental vaccine  
18 669 hesitancy in Italy – Results from a national survey. *Vaccine*. 2018;36:779-87.  
19 670 <https://doi.org/10.1016/j.vaccine.2017.12.074>.  
20  
21 671 [37] Glanz JM, Wagner NM, Narwaney KJ, Shoup JA, McClure DL, McCormick EV, et al. A mixed  
22 672 methods study of parental vaccine decision making and parent-provider trust. *Academic  
23 673 Pediatrics*. 2013;13:481-8. <https://doi.org/10.1016/j.acap.2013.05.030>.  
24 674 [38] Eller NM, Henrikson NB, Opel DJ. Vaccine information sources and parental trust in their  
25 675 child's health care provider. *Health Education & Behavior*. 2019;46:445-53.  
26 676 <https://doi.org/10.1177/1090198118819716>.  
27  
28 677 [39] Wang E, Baras Y, Bутtenheim AM. "Everybody just wants to do what's best for their child":  
29 678 Understanding how pro-vaccine parents can support a culture of vaccine hesitancy. *Vaccine*.  
30 679 2015;33:6703-9. <https://doi.org/10.1016/j.vaccine.2015.10.090>.  
31 680 [40] Sobo EJ, Huhn A, Sannwald A, Thurman L. Information Curation among Vaccine Cautious  
32 681 Parents: Web 2.0, Pinterest Thinking, and Pediatric Vaccination Choice. *Medical Anthropology*.  
33 682 2016;35:529-46. 10.1080/01459740.2016.1145219.  
34  
35 683 [41] Betsch C, Brewer NT, Brocard P, Davies P, Gaissmaier W, Haase N, et al. Opportunities  
36 684 and challenges of Web 2.0 for vaccination decisions. *Vaccine*. 2012;30:3727-33.  
37 685 <https://doi.org/10.1016/j.vaccine.2012.02.025>.  
38  
39 686 [42] Paterson P, Meurice F, Stanberry LR, Glismann S, Rosenthal SL, Larson HJ. Vaccine  
40 687 hesitancy and healthcare providers. *Vaccine*. 2016;34:6700-6.  
41 688 <https://doi.org/10.1016/j.vaccine.2016.10.042>.  
42 689 [43] Cooper S, Schmidt B, Sambala E, Swartz A, Colvin C, Leon N, et al. Factors that influence  
43 690 parents' and informal caregivers' views and practices regarding routine childhood vaccination:  
44 691 a qualitative evidence synthesis. *Cochrane Database*. 2021.  
45 692 <https://doi.org/10.1002/14651858.CD013265.pub2>.  
46 693  
47  
48  
49 694  
50  
51  
52  
53  
54  
55  
56  
57  
58  
59  
60



**Figure 1.** Number of trusted vaccination information sources.

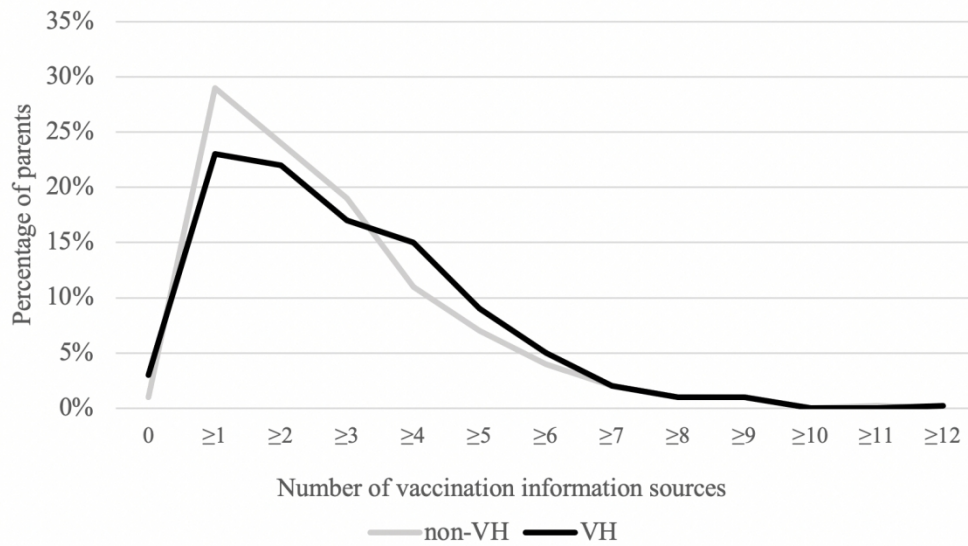

**Note.** Distribution of the number of trusted vaccination information sources. We divided parents into non-VH and VH according to PACV score  $<$  or  $\geq 50$ . The median, mean (standard deviation) of information sources was; 2, 2.80 (1.90) for the entire study population (N=1390); 2, 2.70 (1.83) for the non-VH parents (N=889), and; 3, 2.98 (2.02) for the VH parents (N=501). Wilcoxon Rank Sum test was used for statistical analysis.

Figure 1. Number of trusted vaccination information sources.

Figure 2. Parental satisfaction with and trust in the child’s biomedical or CAM primary provider.

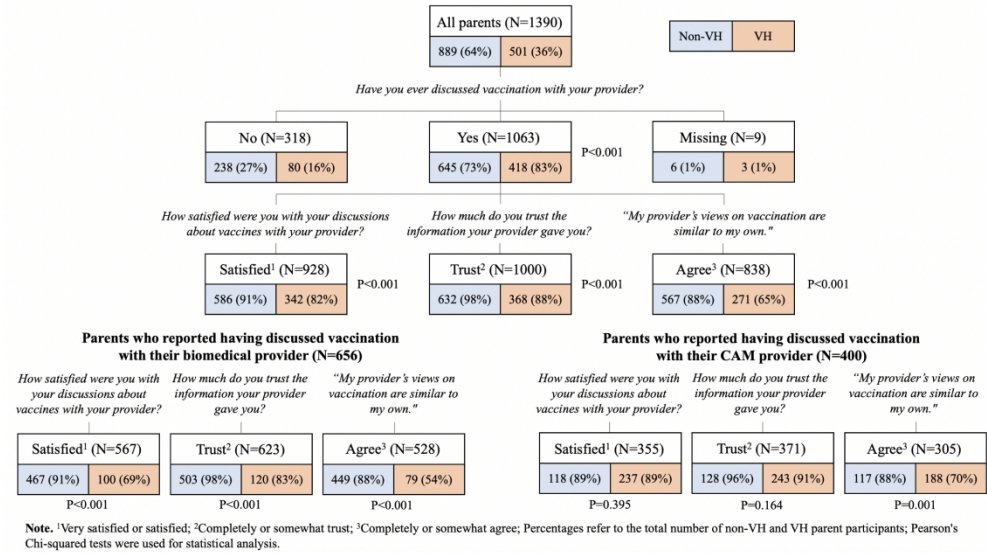

Figure 2. Parental satisfaction with and trust in the child’s biomedical or CAM primary provider.

## Qualitative interview guideline for parents

### Background about the children and parents

- 1) How many children do you have? How old are they? Are they boys or girls?
- 2) What type of school do your children attend (probe: public, private, daycare)?
- 3) What is your civil status (married/divorced/widowed/single/etc.)? Is your child's/children's other parent(s) present?
- 4) How old are you? How old is your partner (spouse, other child's parent)?
- 5) Where were you born and raised? And your partner (spouse, child's other parent)? What is your nationality? And your partner's (spouse, child's other parent)?
  - a. For participants not originally from Switzerland:
    - i. How long have you been in Switzerland?
    - ii. How long has your partner (spouse, child's other parent) been in Switzerland?
- 6) Where in Switzerland do you live?
- 7) What is the highest level of education that you have attained? What is the highest level of education that your partner (spouse, other child's parent) has attained?
  - i. no completed school or professional education
  - iii. mandatory school (9 years in Switzerland)
  - iv. finished apprenticeship
  - v. bachelors degree
  - vi. higher professional education
  - vii. higher technical or commercial school
  - viii. university
  - ix. other
- 8) What is your current occupation? What is your rate of occupation (i.e. 25, 50, 75, or 100%) What is your partner's (spouse, other child's parent) current occupation? What is your partner's rate of occupation (i.e. 25, 50, 75, or 100%)
- 9) Could you talk about the parents' roles in the family? Who works? Who takes care of the children? Who makes the children's healthcare decisions? Who made the decision regarding the children's vaccinations?
- 10) Do your children attend daycare? Does one parent stay home with the children while the other parent works? How do you manage childcare?

### Questions about the children, their health, and their healthcare

- 11) What kind of health are your children in? (prompt: any chronic illnesses? birth defects? healthy?)
- 12) For your children's health, do you consult traditional biomedical doctors? CAM providers? Both?
- 13) **When you consult biomedical providers:** For what issues do you seek biomedical doctors' input for your children? Why? How often? Can you think of an example?
- 14) **When you consult CAM providers:** For what issues do you seek CAM providers' input for your children? Why? How often? Can you think of an example?
- 15) How would you describe your family's lifestyle? (Probe: What kinds of foods does your family eat (healthy/organic/avoid toxins)? What kind of physical activities do you do? Would you consider your family as making healthy choices? Why or why not?)

### Questions about vaccine practices and beliefs

- 16) **Childhood vaccinations:** I had a look at your child's/children's vaccine certificate, and I noticed... (i.e. differences between the children, missing or delayed vaccinations, all vaccinations were administered according to the OFSP/BAG recommendations, etc. \*During this part of the interview, Julia and/or Mike will have the vaccination booklet in order to look it over with the parents. We decided to consider the two youngest children and to ask if there have been any

**Qualitative interview guideline for parents**

1 major vaccination changes between the two youngest and the other children in the family. If  
 2 there have been major vaccination changes, ask about this).

- 3 a. Do you think your child/children had all the recommended vaccinations?  
 4 b. What were the reasons and/or your motivations for your children to receive the vaccinations  
 5 that they did receive?  
 6 c. If your child/children haven't received some of the recommended vaccinations, why not?  
 7 d. Have all your children received the same vaccinations? Why or why not? Has something  
 8 changed the way that you think about vaccinations between your children? (Prompt: learned  
 9 new information about vaccinations, vaccination experience with the first child, differences  
 10 between children (e.g. each child's perceived immunity/potential of getting sick, particular  
 11 childhood ailments, allergies, sensitivities, etc.))  
 12 e. Do you have any regrets about vaccinating or not vaccinating your child/children for  
 13 childhood vaccinations? Why or why not?  
 14 f. How do you feel about childhood vaccinations? Why? Probe:  
 15  Are you for them? Are you against them?  
 16  Worldviews: Do your religious convictions influence views on vaccines? Do your  
 17 political convictions influence views on vaccines?  
 18  Work and family set-up: How do you prevent your children from becoming sick? How  
 19 do you manage when your children are sick? Can you stay home with them? Can you  
 20 take them to see a doctor?  
 21  Can you give examples?  
 22 g. What are the benefits of childhood vaccinations? What are the risks of childhood  
 23 vaccinations?  
 24 h. Do you think there are differences between different types of vaccinations? Are some more  
 25 beneficial than others? If yes, which ones? Why? Are some more risky than others? If yes,  
 26 which ones? Why?

27 **17) HPV:** I had a look at your child's/children's vaccine certificate and I noticed... (i.e. differences  
 28 between the children, missing or delayed vaccinations, etc.)

- 29 a. Are your children aged 11 to 14 boys or girls? Did you consider the HPV vaccine for both  
 30 boys and girls? Why or why not?  
 31 b. Do you think your child has received all the recommended doses of the HPV vaccine?  
 32 c. Why did they receive them or why did they not receive them?  
 33 d. Were all your children vaccinated against HPV? Why or why not? What changed your mind?  
 34 Prompt:  
 35  boys vs. girls getting the vaccination  
 36  learned new information about vaccination  
 37  vaccination experience with the first child  
 38  differences between children (e.g. each child's perceived immunity/potential of getting  
 39 sick, particular childhood ailments, allergies, sensitivities, etc.)  
 40  it is a relatively new vaccine  
 41 e. What did you consider when deciding on the HPV vaccine for your children? Probe:  
 42  What does the vaccine protect against?  
 43  How new the vaccine is?  
 44  Not knowing the side effects or long-term effects?  
 45  Did you consider the preventative aspects for sexually transmitted infections? Does  
 46 receiving the vaccine encourage earlier sexual relationships? Does its ability to protect  
 47 against certain STI's influence your decision? Why or why not?  
 48 f. What are the benefits of HPV vaccinations? What are the risks of HPV vaccinations?  
 49 g. Do you have regrets about vaccinating or not vaccinating your child/children against HPV?  
 50 Why or why not?  
 51  
 52  
 53  
 54  
 55  
 56  
 57  
 58  
 59  
 60

**Qualitative interview guideline for parents**

- 1  
2  
3  
4  
5  
6  
7  
8  
9  
10  
11  
12  
13  
14  
15  
16  
17  
18
- 18) Have your children ever had any side effects or complications from any vaccinations? If yes, what were they? And from what vaccinations? Did you expect these side effects or complications? Why or why not?
- 19) How was the actual experience of vaccinating your child/children? (prompts: stressful, child crying, painful for child, feeling helpless, agreeable/not stressful). Who vaccinated your child/children? (prompts: pediatrician, school health service, etc.)
- 20) What do you think about alternative vaccination schedules, which allow parents to decide at what moment the vaccination should be administered, even if this does not strictly follow BAG/OFSP guidelines?
- 21) Do you think vaccinations should be an individual choice for families? Why or why not? Is this how you viewed it when making your decisions? Did you consider public and community health consequences when deciding whether to vaccinate your children or not? (Probe: For example, did you consider how your child being vaccinated or not might affect other people (e.g. children infecting other children)? Why or why not?

**Questions about the decision-making process regarding vaccines**

- 21  
22  
23  
24  
25  
26  
27  
28  
29  
30  
31  
32  
33  
34  
35  
36  
37  
38  
39  
40  
41  
42  
43  
44
- 22) How did you decide if you were going to vaccinate your children or not? Why?
- 23) With whom did you discuss vaccines for your children? (Probe: spouse/child's other parent? Parents? Friends? Family? Doctors? School doctors/nurses/medical staff? Teachers/daycare providers?) Do you trust these people and how they make healthcare decisions? Why or why not? What specifically did you discuss with these people? Did you trust what they said? Why or why not? Who was the most influential person in determining whether or not you would vaccinate your children? Why?
- 24) Did you look for information about childhood/HPV vaccines? If so, where did you look? (probe: Internet websites, forums, magazine articles, books, etc.)? Were you comfortable with the information that these sources provided? Why or why not? Which source was the most influential for you?
- 25) Did your child's school (or school health services) offer to provide vaccinations for your children? If so, which ones? What kind of information did they provide? Did you have the opportunity to discuss vaccinations with someone from the school/school health service? How was authorization requested? What do you think about this process (probe: Were you satisfied with the process? Why or why not?)?
- 26) Have you ever felt pressured to vaccinate or not vaccinate your children outside of a medical setting? By whom? (Probe: spouse/child's other parent? Parents? Friends? Family? Authorities? Teachers/daycare providers (perhaps may have excluded children from being allowed to come to daycare?)) How specifically did they pressure you? Did they influence your decision?

**Questions about the decision-making process during the patient-provider interaction**

- 45  
46  
47  
48  
49  
50  
51  
52  
53  
54  
55  
56  
57  
58  
59  
60
- 27) When discussing the vaccination decision with your provider(s), what were your questions regarding vaccines? Were you comfortable raising these questions or concerns? How did the provider(s) react to your questions or concerns? (probe: Was the provider receptive? Were you criticized, belittled, or patronized for your questions/concerns? Were you taken seriously?) Were your questions sufficiently addressed by the medical provider(s) (**biomedical and/or CAM**)? Why or why not?
- 28) Did you discuss the vaccination decision for your children with your medical provider(s)? With a biomedical provider? A CAM provider? Or both?
- a. **For parents seeking vaccine advice from CAM providers, probe further:** Why did you choose to seek vaccine-related information from a CAM medical provider? Do you trust this information? Why or why not? How did the discussion go? Were your questions sufficiently addressed by the CAM provider? Why or why not?

## Qualitative interview guideline for parents

- 1  
2  
3  
4  
5  
6  
7  
8  
9  
10  
11  
12  
13  
14  
15  
16  
17  
18  
19  
20  
21  
22  
23  
24  
25  
26  
27  
28  
29  
30  
31  
32  
33  
34  
35  
36  
37  
38  
39  
40  
41  
42  
43  
44  
45  
46  
47  
48  
49  
50  
51  
52  
53  
54  
55  
56  
57  
58  
59  
60
- b. For parents seeking vaccine advice from biomedical providers, probe further:** Why did you choose to seek vaccine-related information from a biomedical provider? Do you trust this information? Why or why not? How did the discussion go? Were your questions sufficient addressed by the biomedical provider? Why or why not?
- c. For parents seeking vaccine advice from both, probe further:** Why did you choose to seek vaccine-related information from both CAM and biomedical providers?
- 29) Have you ever felt pressured to vaccinate or not vaccinate your children by any of your providers? And in other medical settings (i.e. urgent care centers)? How specifically did the provider pressure you? How did it happen in other medical settings? Did this influence your decision to vaccinate or not vaccinate your children? How so?
- 30) Have you ever been criticized or excluded from a practitioner's office because of your views towards vaccinations? In what circumstances? Did this influence your decision to vaccinate or not vaccinate your children?
- 31) About how much time did you spend discussing vaccinations with your provider(s)? Do you think the medical provider(s) (**biomedical and/or CAM**) spent enough time addressing your vaccine-related concerns? Would you have liked to spend more time discussing vaccinations with your provider? Why or why not?
- 32) How clearly did your medical provider(s) explain vaccinations to you? Did you understand the information provided to you? Would you have liked to receive more/other information from your medical provider(s)? If so, about what specifically?

### Concluding Questions

- 33) In conclusion, what is the most important factor influencing your decision towards vaccinations?
- 34) Is there anything that you could recommend to improve upon how vaccines are currently administered in Switzerland? If so, what would you recommend?
- 35) Would you like to make any clarifications about anything we discussed? Would you like to add anything that we did not discuss? Do you have any questions?

## Questions for providers

### Introduction - Establishing background information about the provider

- 1) Can you talk a bit about yourself and briefly present your job title? How would you introduce yourself to other colleagues?
- 2) What type of provider are you (probe: pediatrician, generalist, biomedical, CAM, etc.)?
- 3) How long have you been practicing medicine? In what year was your final exam? How long have you been practicing in your current position?
- 4) Do you follow any specific approaches to medicine and medical treatment?
- 5) What types of patients do you see and treat?

### Questions about patient-provider interactions

- 6) Do you recommend vaccinations to your patients? If so, which ones? Why do you recommend them?
- 7) If you do not recommend vaccinations to your patients, why not? Which ones do you not recommend? Why?
- 8) **Childhood vaccines:** Can you describe a typical vaccine consultation which involves young children's (less than 11 years old) vaccination-related decisions? Who is present? How do you inform parents/children about vaccinations? What is discussed? Who makes the decisions (probe: mother, father, child, provider decides for the parent, etc.)?
- 9) **HPV:** Can you describe a typical vaccine consultation, which involves adolescent patients' (between 11 and 14 years old) vaccination-related decisions for HPV? Who is present? How do you inform parents/adolescents about vaccinations? Do you broach sexuality? What is discussed (probe: sexuality, genital warts, cervical cancer, ear nose and throat cancers, anal/penis cancer)? Is there any difference when discussing HPV-vaccinations with a female or male adolescent? Who makes the decisions (probe: mother, father, adolescent, provider, school physician/authorities)?
- 10) In general, when it comes to vaccination-related decisions, who tends to make the decisions? (probe: mother, father, both, child/adolescent, provider, school physician/authorities)?
- 11) What are typical questions parents (mothers/fathers) have concerning vaccines for their children? (Probe: What kinds of questions do they have about childhood vaccinations? What kinds of questions do they have about the HPV vaccine? Anxieties/concerns?)
- 12) How do you discuss the consequences of vaccinating or not vaccinating children with parents? Can you give examples?
  - a. How do you discuss vaccinations with parents who wish to vaccinate their children? Do you have any examples? What are the key reasons for parents that come to you to vaccinate their children?
  - b. How do you discuss vaccinations with parents who are hesitant to vaccinate their children? Do you have any examples? What are the key reasons for parents that come to you not to vaccinate their children?
- 13) Do you try to influence parents' decisions regarding vaccination for their children? If so, how do you try to convince parents to follow your recommendations? What advice do you give? Do you have any strategies to influence parents' decisions?
- 14) Do parents generally follow your advice and recommendations regarding vaccination? Why or why not?
- 15) Have you ever excluded a patient from your practice/clinic due to his/her perspectives on vaccination? Can you provide an example? What happened during this consultation?
- 16) How much time do you usually have for the discussions with parents regarding vaccination? Do you feel that this amount of time is sufficient? How much time do you need? (Probe: would you like more or less time spent on the topic?)
- 17) Do you feel like you have been properly trained to discuss vaccinations with parents and children/adolescent? Would you like extra training? What should this extra training cover?

## Questions for providers

### Information about vaccination beliefs, practices, and recommendations to patients

- 18) How do you feel about vaccinations?
- 19) Where do you obtain your information regarding vaccinations (probe: colleagues, Swiss/BAG recommendations, specific approach to medicine, Internet, medical textbooks, etc.)?
- 20) For you, is there a difference between immunity that has been acquired “naturally” (i.e. having been infected with a disease and surviving) and immunity acquired through the use of vaccines? What is the difference for you? Is one way better than the other? Why or why not?
- 21) What do you think about waiting to vaccinate children when they are older, (prompt: immune systems more mature, body integrity, causing injury, vulnerability, protected by mother antibodies)?
- 22) How do you feel about individualized vaccine schedules?
- 23) Do you think vaccinations should be an individual choice for families? Why or why not? Should considerations of community/public health (i.e. herd immunity) also play a role in vaccine decisions? Why or why not? (If needed, explain herd immunity: When a critical portion of a community is immunized against a contagious disease, most members of the community are protected against that disease because there is little opportunity for an outbreak.)
- 24) In your opinion, are people in Switzerland vaccinated sufficiently? Should there be a specific vaccination rate? (probe: higher rates, lower rates, fine as is, etc.)
- 25) Do you think vaccinations can have any benefits? What kind of benefits? Where do you get the information related to benefits? Do you trust these sources? Why or why not?
- 26) Do you think vaccinations can have any risks? What kind of risks? Where do you get the information related to risks? Do you trust these sources? Why or why not?
- 27) Do you think there are differences between different types of vaccinations? Are some more beneficial than others? If yes, which ones? Are some more risky than others? If yes, which ones?
  - a. **Recommended childhood vaccinations:** (Probe: recommended childhood vaccines in Switzerland: DTP-HIB-IPV; Diphtheria, Tetanus, Pertussis, Haemophilus influenzae (meningitis), Polio; MMR: mumps, measles, rubella).
  - b. **Adolescent Vaccines: for HPV:** What do you consider when discussing HPV with your patients? (probe: Do you have different advice for males and females? What does the vaccine protect against? How new the vaccine is? Not knowing the side effects or long-term effects? Did you consider the preventative aspects for sexually transmitted infections? earlier onset of sexual activity, more partners, more unprotected sex because the vaccine “protects”, etc. Does that influence your advice? Why or why not?)
- 28) Is there anything that could prompt you to change your beliefs about vaccinations for your patients?

### Concluding Questions

- 29) To conclude, what are the most important considerations regarding vaccines?
- 30) Is there anything that you could recommend to improve upon how vaccines are currently administered in Switzerland? If so, what would you recommend?
- 31) Would you like to make any clarifications about anything we discussed? Would you like to add anything that we did not discuss? Do you have any questions?



## Quantitative questionnaire

Select the questionnaire

Childhood vaccination

HPV parent

HPV adolescent

Provider

Select the language

English

Français

Deutsch

Italiano

Date of the interview

Date

ID of interviewer

Identifying number

ID of questionnaire

Identifying number

ID of provider

Identifying number

Name of provider

Write-in response with provider's name

Name of respondent

Write-in response with respondent's name

Name of the target child

Write-in response with target child's/youth's name

Birthday of the target child

Date of birth of target child/youth

Is a copy of the vaccination card available to the study team?

Yes

Not yet available, but participant agreed to send it during recruitment

Card not available: do not vaccinate

Card not available: lost vaccination card

Card not available: child too young

Card not available: other reason

Participant does not want to share the card

No answer

Consent form available

Yes

No

Is the relevant person available?

Yes, target person is already on the phone and ready for interview

Another situation...

Please describe why the person is not available and what are the next steps

Write-in response with why the person is not available and what are the next steps

What is the sex of [child's name]?

Boy

Girl

Intersex

Doesn't want to disclose

1  
2  
3  
4  
5  
6 Is Dr. [primary providers's name] [child's name]'s doctor?

7 Yes

8 No

9 Unclear

10  
11 Right person identified, interview can start

12 Interview started

13 Language problems

14 Person refused

15 Interviewee incapacitated

16 Other

17  
18  
19 The interview cannot take place as not all identification or selection criteria are met. I would like to  
20 thank you very much for your time.

21 In order to obtain more background about you and your practices, could you please tell me if you are a  
22 licensed medical doctor in Switzerland?

23 Yes

24 No

25 Missing

26  
27 Have you undertaken any additional specialist training in any discipline of complementary and/or  
28 alternative medicine?

29 Yes

30 No

31 Missing

32  
33 Which ones?

34 Anthroposophic medicine

35 Traditional Chinese Medicine / Acupuncture

36 Homeopathic medicine

37 Phytotherapy (i.e. plant-based/herbal remedies)

38 Other(s)

39 No answer

40  
41  
42 Ok. Thank you. Do you provide any complementary or alternative medicines to your patients?

43 No

44 Yes

45 Missing

46  
47 Which ones?

48 Anthroposophic medicine

49 Traditional Chinese Medicine / Acupuncture

50 Homeopathic medicine

51 Phytotherapy (i.e. plant-based/herbal remedies)

52 Other(s)

53 No answer

54  
55  
56 Anthroposophic medicine

57 No

58 Yes

59  
60 Traditional Chinese Medicine / Acupuncture

No

Yes

1  
2  
3 Homeopathic medicine

4 No  
5 Yes

6  
7 Phytotherapy (i.e. plant-based/herbal remedies)

8 No  
9 Yes

10 Other(s)

11 No  
12 Yes

13 No answer

14 No  
15 Yes

16 You live in a household with X people. How would you describe the household you live in. Is it...

17  
18 Household of a couple with 1 or more children

19 Household of a single parent with 1 or more  
20 children

21 Household of people who are not related at all

22 Household where some of the people are  
23 related

24 Household of people who are all related

25 Doesn't want to disclose

26 Doesn't know

27 Missing

28  
29 Could you please tell me about the people who live in your home, yourself included?

30 First yourself [person 1], what is your age?

31 Age

32 Person 1, sex

33 Male

34 Female

35 Other/not disclosed

36 Missing

37  
38  
39 How are you related to [child's name]?

40 Mother

41 Step-mother

42 Mother/father's partner

43 Sister or half-sister

44 Step-sister

45 Grand-mother

46 Aunt, cousin

47 Other relative

48 Not a relative

49 Doesn't want to disclose

50 Doesn't know

51 Missing

52 How are you related to [child's name]?

53 Father

54 Step-father

55 Mother/father's partner

56 Brother or half-brother

1  
2  
3  
4 Step-brother  
5 Grand-father  
6 Uncle, cousin  
7 Other relative  
8 Not a relative  
9  
10 Doesn't want to disclose  
11 Doesn't know  
12  
13 Missing  
14 Besides you and [child's name], who else lives in your household?  
15 Indicates that another person lives in household  
16 Indicates that NO other person lives in  
17 household  
18 Doesn't want to say  
19  
20 Missing  
21 Person 2, age  
22 [Same as above]  
23  
24 Person 2, sex  
25 [Same as above]  
26 How is she related to [child's name]?  
27 [Same as above]  
28 How is he related to [child's name]?  
29  
30 [Same as above]  
31 Does someone else live in your household?  
32 [Same as above]  
33 Person 3, age  
34 [Same as above]  
35 Person 3, sex  
36 [Same as above]  
37 How is she related to [child's name]?  
38 [Same as above]  
39 How is he related to [child's name]?  
40  
41 [Same as above]  
42 Do you have children?  
43 Yes  
44 No  
45 Doesn't want to disclose  
46 Doesn't know  
47  
48 Missing  
49 How many?  
50 Number of children  
51 Do you have any children who do not live at home?  
52  
53 Yes  
54 No  
55 Doesn't want to disclose  
56 Doesn't know  
57  
58 Missing  
59 How many?  
60 Number of children  
How would you describe the household you live in. Is it...

1  
2  
3  
4  
5  
6  
7  
8  
9  
10  
11  
12  
13  
14  
15  
16  
17  
18  
19  
20  
21  
22  
23  
24  
25  
26  
27  
28  
29  
30  
31  
32  
33  
34  
35  
36  
37  
38  
39  
40  
41  
42  
43  
44  
45  
46  
47  
48  
49  
50  
51  
52  
53  
54  
55  
56  
57  
58  
59  
60

- Household of couple without children
- Household of a couple with 1 or more children
- Household of a single parent with 1 or more children
- Household of people who are not related at all
- Household where some of the people are related
- Household of people who are all related
- doesn't want to disclose
- doesn't know
- missing

Have you ever delayed [child's name]'s vaccination for reasons other than illness or allergy?

- Yes
- No
- Doesn't want to disclose
- Doesn't know
- Missing

Have you ever refused [child's name]'s vaccination for reasons other than illness or allergy?

- Yes
- No
- Doesn't want to disclose
- Doesn't know
- Missing

On a scale from 0 to 10, with 0 being not sure at all and 10 being completely sure, How sure are you that following the recommended vaccine schedule is a good idea for [child's name]?

0 - 10

I will rephrase the question: On a scale from 0 to 10, with 0 being not sure at all and 10 being completely sure, how sure are you that it is a good idea to vaccinate [child's name] with the vaccines recommended by the Federal Office of Public Health?

0 - 10

Do you agree or disagree with the following statements:

It is my role as a parent to question shots.

- Strongly agree
- Sgree
- Not sure
- Disagree
- Strongly disagree
- Doesn't want to disclose
- Missing

I believe that many of the illnesses that vaccines prevent are severe.

- Strongly agree
- Sgree
- Not sure
- Disagree
- Strongly disagree
- Doesn't want to disclose
- Missing

1  
2  
3 It is better for [child's name] to develop immunity by getting sick than to get a vaccine.  
4

5 Strongly agree

6 Agree

7 Not sure

8 Disagree

9 Strongly disagree

10 Doesn't want to disclose

11 Missing

12  
13  
14 It's better for [child's name] to get fewer vaccines at the same time.

15 Strongly agree

16 Agree

17 Not sure

18 Disagree

19 Strongly disagree

20 Doesn't want to disclose

21 Missing

22  
23  
24  
25 How concerned are you that [child's name] might have a serious side effect from a vaccine?

26 Not at all concerned

27 Not too concerned

28 Not sure

29 Somewhat concerned

30 Very concerned

31 Doesn't want to disclose

32 Missing

33  
34  
35 How concerned are you that one of the vaccines might not be safe?

36 Not at all concerned

37 Not too concerned

38 Not sure

39 Somewhat concerned

40 Very concerned

41 Doesn't want to disclose

42 Missing

43  
44  
45  
46 How concerned are you that vaccines might not prevent disease?

47 Not at all concerned

48 Not too concerned

49 Not sure

50 Somewhat concerned

51 Very concerned

52 Doesn't want to disclose

53 Missing

54  
55  
56  
57 If you had another child today, would you want him/her to get all the recommended vaccines?

58 Yes

59 No

60 Doesn't want to disclose

1  
2  
3 Doesn't know

4 Missing

5  
6 Overall, how hesitant about vaccinations would you consider yourself to be?

7 Not at all hesitant

8 Not too hesitant

9 Not sure

10 Somewhat hesitant

11 Very hesitant

12 doesn't want to disclose

13 missing

14 Do you agree or disagree with the following statements:

15 I educate parents of children in my practice about the importance of immunizations.

16 Strongly agree

17 Sgree

18 Not sure

19 Disagree

20 Strongly disagree

21 Doesn't want to disclose

22 Missing

23 I monitor whether or not children I see are up to date on their immunizations.

24 Strongly agree

25 Sgree

26 Not sure

27 Disagree

28 Strongly disagree

29 Doesn't want to disclose

30 Missing

31 I trust the information I receive about vaccinations .

32 Strongly agree

33 Sgree

34 Not sure

35 Disagree

36 Strongly disagree

37 Doesn't want to disclose

38 Missing

39 I am able to openly discuss my concerns about vaccines with my child's doctor.

40 Strongly agree

41 Sgree

42 Not sure

43 Disagree

44 Strongly disagree

45 Doesn't want to disclose

46 Missing

47 All things considered, how much do you trust your child's doctor, on a scale from 0 to 10, with 0  
48 being not at all and 10 being completely?  
49  
50

- 1  
2  
3 0 - 10  
4 Have you ever discussed [child's name]'s vaccination with [provider's name]?  
5 Yes  
6 No  
7  
8 Doesn't want to disclose  
9 Doesn't know  
10 Missing  
11 How strongly does [provider's name] recommend vaccinating [child's name] with all the  
12 recommended vaccines?  
13  
14 Supports all recommended vaccines  
15 Supports most recommended vaccines  
16 Supports some recommended vaccines  
17 Doesn't support any recommended vaccines  
18 Doesn't want to disclose  
19 Doesn't know  
20 Doesn't know  
21 Missing  
22  
23 How important is following the recommended vaccination schedule for [provider's name]?  
24  
25 Very important  
26 Somewhat important  
27 Not very important  
28 Not important at all  
29 Doesn't want to disclose  
30 Doesn't know  
31 Missing  
32  
33 How much do you trust the information [provider's name] gave you?  
34  
35 Completely trust  
36 Somewhat trust  
37 Neither trust nor distrust  
38 Somewhat distrust  
39 Don't trust at all  
40 Doesn't want to disclose  
41 Doesn't know  
42 Missing  
43  
44 How satisfied were you with your discussions about vaccines with [provider's name]?  
45  
46 Not at all satisfied  
47 Somewhat satisfied  
48 Neither satisfied nor unsatisfied  
49 Satisfied  
50 Very satisfied  
51 Doesn't want to disclose  
52 Doesn't know  
53 Missing  
54  
55 Please indicate how much you agree with the following statements:  
56  
57 I am able to ask [provider's name] questions about vaccination.  
58  
59 Completely agree  
60



1  
2  
3  
4  
5  
6  
7  
8  
9  
10  
11  
12  
13  
14  
15  
16  
17  
18  
19  
20  
21  
22  
23  
24  
25  
26  
27  
28  
29  
30  
31  
32  
33  
34  
35  
36  
37  
38  
39  
40  
41  
42  
43  
44  
45  
46  
47  
48  
49  
50  
51  
52  
53  
54  
55  
56  
57  
58  
59  
60

Somewhat agree

Neither agree nor disagree

Somewhat disagree

Completely disagree

Doesn't want to disclose

Doesn't know

Missing

[Provider's name] takes the time needed to discuss my concerns about vaccination with me.

Completely agree

Somewhat agree

Neither agree nor disagree

Somewhat disagree

Completely disagree

Doesn't want to disclose

Doesn't know

Missing

[Provider's name] takes my concerns about vaccination seriously.

Completely agree

Somewhat agree

Neither agree nor disagree

Somewhat disagree

Completely disagree

Doesn't want to disclose

Doesn't know

Missing

[Provider's name]'s views on vaccination are similar to my own.

Completely agree

Somewhat agree

Neither agree nor disagree

Somewhat disagree

Completely disagree

Doesn't want to disclose

Doesn't know

Missing

Have you discussed vaccination for [child's name] with any other doctor?

Yes

No

Doesn't want to disclose

Doesn't know

Missing

What led you to consult another doctor?

Second opinion

Moved

Former provider stopped working

1  
2  
3 Disagreement with provider

4 Other: \_\_\_\_\_

5 Doesn't want to disclose

6 Doesn't know

7 Missing

8  
9  
10 How satisfied were you with your discussions about [child's name]'s vaccines with that doctor?

11 Not at all satisfied

12 Somewhat satisfied

13 Neither satisfied nor unsatisfied

14 Satisfied

15 Very satisfied

16 Doesn't want to disclose

17 Doesn't know

18 Missing

19  
20  
21  
22 How much do you trust the information that doctor gave you about vaccines?

23 Completely trust

24 Somewhat trust

25 Neither trust nor distrust

26 Somewhat distrust

27 Don't trust at all

28 Doesn't want to disclose

29 Doesn't know

30 Missing

31  
32  
33  
34 What are your most trusted information sources on vaccination?

35 No information/no source

36 Family

37 My child's doctor

38 Other doctor

39 Friends and acquaintances

40 Public health authorities

41 TV

42 Internet

43 Social media (such as Facebook, Instagram and  
44 Twitter)

45 Print media (such as books, magazines and  
46 newspapers)

47 Other: \_\_\_\_\_

48 Doesn't want to disclose

49 Doesn't know

50 Missing

51 Which TV programs?

52 Write-in response

53 Which websites?

54 Write-in response

55 What social media?

56 Write-in response

57 What print media?

1  
2  
3  
4  
5  
6  
7  
8  
9  
10  
11  
12  
13  
14  
15  
16  
17  
18  
19  
20  
21  
22  
23  
24  
25  
26  
27  
28  
29  
30  
31  
32  
33  
34  
35  
36  
37  
38  
39  
40  
41  
42  
43  
44  
45  
46  
47  
48  
49  
50  
51  
52  
53  
54  
55  
56  
57  
58  
59  
60

Write-in response  
What other sources?

Write-in response

Did you apply the information you received when making decisions about vaccination for your child?

Yes

No

Doesn't want to disclose

Doesn't know

Missing

Please indicate how much you agree with the following statements:

I can always prevent my child from being infected with vaccine-preventable diseases by other means than vaccination.

Completely agree

Somewhat agree

Neither agree nor disagree

Somewhat disagree

Completely disagree

Doesn't want to disclose

Doesn't know

Missing

Vaccine-preventable diseases can be easily cured in Switzerland.

Completely agree

Somewhat agree

Neither agree nor disagree

Somewhat disagree

Completely disagree

Doesn't want to disclose

Doesn't know

Missing

Vaccines can cause serious long-term harm to health.

Completely agree

Somewhat agree

Neither agree nor disagree

Somewhat disagree

Completely disagree

Doesn't want to disclose

Doesn't know

Missing

Vaccination is unnatural, so it is best to vaccinate as little as possible.

Completely agree

Somewhat agree

Neither agree nor disagree

Somewhat disagree

Completely disagree

Doesn't want to disclose

1  
2  
3  
4 Doesn't know

5 Missing

6 How likely do you think it is that your child will be exposed to vaccine-preventable diseases  
7 in your home?

8 Very likely

9 Somewhat likely

10 Not sure

11 Somewhat unlikely

12 Very unlikely

13 Doesn't want to disclose

14 Doesn't know

15 Missing

16 How likely do you think it is that your child will be exposed to vaccine-preventable diseases in  
17 your community?

18 Very likely

19 Somewhat likely

20 Not sure

21 Somewhat unlikely

22 Very unlikely

23 Doesn't want to disclose

24 Doesn't know

25 Missing

26 About how many of your family members with children do you think have vaccinated their children?

27 Almost all

28 About three-quarters

29 About half

30 About a quarter

31 Almost none

32 Doesn't want to disclose

33 Doesn't know

34 Missing

35 About how many of your friends with children do you think have vaccinated their children?

36 Almost all

37 About three-quarters

38 About half

39 About a quarter

40 Almost none

41 Doesn't want to disclose

42 Doesn't know

43 Missing

44 About how many of the children in your community do you think are vaccinated?

45 Almost all

46 About three-quarters

47 About half

48 About a quarter

1  
2  
3  
4  
5  
6  
7  
8  
9  
10  
11  
12  
13  
14  
15  
16  
17  
18  
19  
20  
21  
22  
23  
24  
25  
26  
27  
28  
29  
30  
31  
32  
33  
34  
35  
36  
37  
38  
39  
40  
41  
42  
43  
44  
45  
46  
47  
48  
49  
50  
51  
52  
53  
54  
55  
56  
57  
58  
59  
60

Almost none

Doesn't want to disclose

Doesn't know

Missing

Now I would like to ask you some questions about health more generally.

How is your child's health, in general?

Very good

Good

OK

Bad

Very bad

Doesn't want to disclose

Doesn't know

Missing

Do you agree or disagree with the following statements:

It is my responsibility as a parent to actively research health decisions for my child

Strongly agree

Agree

Neither agree nor disagree

Disagree

Strongly disagree

Doesn't want to disclose

Doesn't know

Missing

I took an active role in choosing my child's doctor.

Strongly agree

Agree

Neither agree nor disagree

Disagree

Strongly disagree

Doesn't want to disclose

Doesn't know

Missing

I chose a doctor for my child who shares my views on health.

Strongly agree

Agree

Neither agree nor disagree

Disagree

Strongly disagree

Doesn't want to disclose

Doesn't know

Missing

If I disagree or am uncertain about the advice of a nurse or a doctor, I am comfortable saying so.

Strongly agree

- 1  
2  
3 Agree  
4 Neither agree nor disagree  
5 Disagree  
6 Strongly disagree  
7 Doesn't want to disclose  
8 Doesn't know  
9 Missing

10 How many of the recommended well-child visits from birth until now has your child completed?

- 11 All recommended visits  
12 Some but maybe not all recommended visits  
13 None of them  
14 Doesn't want to disclose  
15 Doesn't know  
16 Missing

17 When [child's name] was an infant (0-2 years old), which of the following childcare options did you use? Please indicate all that apply.

- 18 I (or my partner) stayed home with him/her.  
19 Other family cared for him/her.  
20 A nanny cared for him/her in my home.  
21 He/she attended a small, home-based day care.  
22 He/she attended private day care.  
23 He/she attended public day care.  
24 Other  
25 Doesn't want to disclose  
26 Doesn't know  
27 Missing

28 And how old was he/she when he/she started day care?

29 Age

30 I will now list some activities. Please indicate which of these descriptions applies to what you did when [child's name] was an infant (0-2 years old)? Please indicate all that apply

- 31 In paid work  
32 In education (even if on vacation)  
33 Unemployed and actively looking for a job  
34 Unemployed, wished to work but didn't actively look for a job  
35 Permanently sick or disabled  
36 Retired  
37 In community or military service  
38 Doing housework, looking after children or other persons  
39 Other  
40 Doesn't want to disclose  
41 Doesn't know  
42 Missing

43 What were your total 'basic' or contracted hours each week (in your main job), excluding any paid and unpaid overtime?

44 Hours

1  
2  
3 How is your health in general? Is it...

4  
5 Very good

6 Good

7 OK

8 Bad

9 Very bad

10 Doesn't want to disclose

11 Doesn't know

12 Missing

13  
14  
15 How important is health for you? Here are three options, please tell us which one is closest to  
16 your own opinion.

17 I live without worrying too much about consequences for my  
18 health.

19 My lifestyle is influenced by considerations about maintaining my  
20 health.

21 Considerations about my health have a large impact on how I  
22 live.

23 Doesn't want to disclose

24 Doesn't know

25 Missing

26  
27 In the last 12 months, that is since [month, year], which of the following treatments have you used  
28 for your own health? Please indicate yes or no for each.

29 Acupressure

30 Acupuncture

31 Anthroposophical medicine

32 Chinese medicine

33 Chiropractics

34 Herbal treatment

35 Homeopathy

36 Hypnotherapy

37 Massage therapy

38 Osteopathy

39 Physiotherapy

40 Reflexology

41 Spiritual Healing

42 Other: \_\_\_\_\_

43 None of these

44 Don't know

45  
46  
47  
48  
49  
50 *The following questions have been posed to your patients who participated in this study. We would  
51 now like to pose the same questions to you. This will help us to better understand the factors that  
52 play a role when patients choose their providers.*

53 Now I would like to ask you some questions about other topics to get a sense of your core worldview  
54 and political and religious sentiments.

55 Do you consider yourself as belonging to any particular religion or denomination?

56 Yes

57 No

58 Doesn't want to disclose

59 Doesn't know

1  
2  
3  
4 Missing

5 Which one?

6 Christian: \_\_\_\_\_

7 Jewish: \_\_\_\_\_

8 Islamic: \_\_\_\_\_

9 Eastern religions: \_\_\_\_\_

10 Other non-Christian religions: \_\_\_\_\_

11 Doesn't want to disclose

12 Doesn't know

13 Missing

14 Please specify which exactly:

15 Write-in response

16 Apart from special occasions such as weddings and funerals, about how often do you attend religious services nowadays?

17 Every day

18 More than once a week

19 Once a week

20 At least once a month

21 Only on special holy days

22 Less often

23 Never

24 Doesn't want to disclose

25 Doesn't know

26 Missing

27 Regardless of whether you belong to a particular religion, how religious would you say you are?

28 Not at all religious

29 Somewhat religious

30 Religious

31 Very religious

32 Doesn't want to disclose

33 Doesn't know

34 Missing

35 How important do you consider spiritual experiences to be in your everyday life?

36 Very important

37 Somewhat important

38 Not very important

39 Not important at all

40 Not sure

41 Doesn't want to disclose

42 Doesn't know

43 Missing

44 How interested would you say you are in politics? Are you...

45 Very interested

46 Quite interested

47 Hardly interested



1  
2  
3 Or, not at all interested?

4 Doesn't want to disclose

5 Doesn't know

6 Missing

7  
8  
9 Is there a particular political party that you feel closer to than all the other political parties?

10 Yes

11 No

12 Doesn't want to disclose

13 Doesn't know

14 Missing

15  
16  
17 Which one?

18 Write-in response

19 In politics, people sometimes talk of "left" and "right". Where would you place yourself? Would  
20 you consider yourself...

21 Left

22 Center left

23 Center

24 Center right

25 Right

26 Doesn't want to disclose

27 Doesn't know

28 Missing

29  
30  
31 How often do you participate in activities with a society, a club, a political party, a cultural  
32 association, or other groups, including religious groups?

33 Almost every day

34 About once a week

35 About 1-3 times a month

36 A few times a year

37 More rarely

38 Never

39 Doesn't want to disclose

40 Doesn't know

41 Missing

42  
43  
44  
45 We would now like to pose some questions regarding the values that generally guide people in  
46 their everyday life. The questions don't directly relate to vaccinations.

47  
48 When you decide whether something is right or wrong, to what extent are the following  
49 considerations relevant to your thinking?

50 Whether or not someone suffered emotionally. Is it not at all relevant, not very relevant, slightly  
51 relevant, somewhat relevant, very relevant or extremely relevant?

52 Not at all relevant

53 Not very relevant

54 Slightly relevant

55 Somewhat relevant

56 Very relevant

57 Extremely relevant

58 Doesn't want to disclose

59 Doesn't know

1  
2  
3  
4 Missing

5 Whether or not someone was treated differently than others.

6 Not at all relevant

7 Not very relevant

8 Slightly relevant

9 Somewhat relevant

10 Very relevant

11 Extremely relevant

12 Doesn't want to disclose

13 Doesn't know

14 Missing

15 Whether or not someone's actions showed love for his or her country.

16 Not at all relevant

17 Not very relevant

18 Slightly relevant

19 Somewhat relevant

20 Very relevant

21 Extremely relevant

22 Doesn't want to disclose

23 Doesn't know

24 Missing

25 Whether or not someone's actions showed a lack of respect for authority.

26 Not at all relevant

27 Not very relevant

28 Slightly relevant

29 Somewhat relevant

30 Very relevant

31 Extremely relevant

32 Doesn't want to disclose

33 Doesn't know

34 Missing

35 Whether or not someone violated standards of purity and decency.

36 Not at all relevant

37 Not very relevant

38 Slightly relevant

39 Somewhat relevant

40 Very relevant

41 Extremely relevant

42 Doesn't want to disclose

43 Doesn't know

44 Missing

45 Whether or not someone was good at math.

46 Not at all relevant

47 Not very relevant

1  
2  
3  
4  
5  
6  
7  
8  
9  
10  
11  
12  
13  
14  
15  
16  
17  
18  
19  
20  
21  
22  
23  
24  
25  
26  
27  
28  
29  
30  
31  
32  
33  
34  
35  
36  
37  
38  
39  
40  
41  
42  
43  
44  
45  
46  
47  
48  
49  
50  
51  
52  
53  
54  
55  
56  
57  
58  
59  
60

Slightly relevant  
Somewhat relevant  
Very relevant  
Extremely relevant  
Doesn't want to disclose  
Doesn't know  
Missing

Whether or not someone cared for someone weak or vulnerable.

Not at all relevant  
Not very relevant  
Slightly relevant  
Somewhat relevant  
Very relevant  
Extremely relevant  
Doesn't want to disclose  
Doesn't know  
Missing

Whether or not someone acted unfairly.

Not at all relevant  
Not very relevant  
Slightly relevant  
Somewhat relevant  
Very relevant  
Extremely relevant  
Doesn't want to disclose  
Doesn't know  
Missing

Whether or not someone did something to betray his or her group.

Not at all relevant  
Not very relevant  
Slightly relevant  
Somewhat relevant  
Very relevant  
Extremely relevant  
Doesn't want to disclose  
Doesn't know  
Missing

Whether or not someone conformed to the traditions of society.

Not at all relevant  
Not very relevant  
Slightly relevant  
Somewhat relevant  
Very relevant  
Extremely relevant

1  
2  
3 Doesn't want to disclose

4 Doesn't know

5 Missing

6  
7 Whether or not someone did something disgusting.

8 Not at all relevant

9 Not very relevant

10 Slightly relevant

11 Somewhat relevant

12 Very relevant

13 Extremely relevant

14 Doesn't want to disclose

15 Doesn't know

16 Missing

17  
18 Please listen to the following statements and indicate whether you strongly disagree, moderately disagree, slightly disagree, slightly agree, moderately agree or strongly agree

19 Compassion for those who are suffering is the most crucial virtue.

20 Strongly disagree

21 Moderately disagree

22 Slightly disagree

23 Slightly agree

24 Moderately agree

25 Strongly agree

26 Doesn't want to disclose

27 Doesn't know

28 Missing

29 When the government makes laws, the number one principle should be ensuring that everyone is treated fairly.

30 Strongly disagree

31 Moderately disagree

32 Slightly disagree

33 Slightly agree

34 Moderately agree

35 Strongly agree

36 Doesn't want to disclose

37 Doesn't know

38 Missing

39 I am proud of my country's history.

40 Strongly disagree

41 Moderately disagree

42 Slightly disagree

43 Slightly agree

44 Moderately agree

45 Strongly agree

46 Doesn't want to disclose

47 Doesn't know

1  
2  
3  
4  
5  
6  
7  
8  
9  
10  
11  
12  
13  
14  
15  
16  
17  
18  
19  
20  
21  
22  
23  
24  
25  
26  
27  
28  
29  
30  
31  
32  
33  
34  
35  
36  
37  
38  
39  
40  
41  
42  
43  
44  
45  
46  
47  
48  
49  
50  
51  
52  
53  
54  
55  
56  
57  
58  
59  
60

- Missing
- Respect for authority is something all children need to learn.
- Strongly disagree
- Moderately disagree
- Slightly disagree
- Slightly agree
- Moderately agree
- Strongly agree
- Doesn't want to disclose
- Doesn't know
- Missing
- People should not do things that are disgusting even if no one is harmed.
- Strongly disagree
- Moderately disagree
- Slightly disagree
- Slightly agree
- Moderately agree
- Strongly agree
- Doesn't want to disclose
- Doesn't know
- Missing
- It is better to do good than to do bad.
- Strongly disagree
- Moderately disagree
- Slightly disagree
- Slightly agree
- Moderately agree
- Strongly agree
- Doesn't want to disclose
- Doesn't know
- Missing
- One of the worst things a person could do is hurt a defenseless animal.
- Strongly disagree
- Moderately disagree
- Slightly disagree
- Slightly agree
- Moderately agree
- Strongly agree
- Doesn't want to disclose
- Doesn't know
- Missing
- Justice is the most important requirement for a society.
- Strongly disagree
- Moderately disagree

1  
2  
3  
4  
5  
6  
7  
8  
9  
10  
11  
12  
13  
14  
15  
16  
17  
18  
19  
20  
21  
22  
23  
24  
25  
26  
27  
28  
29  
30  
31  
32  
33  
34  
35  
36  
37  
38  
39  
40  
41  
42  
43  
44  
45  
46  
47  
48  
49  
50  
51  
52  
53  
54  
55  
56  
57  
58  
59  
60

Slightly disagree  
Slightly agree  
Moderately agree  
Strongly agree  
Doesn't want to disclose  
Doesn't know  
Missing

People should be loyal to their family members even when they have done something wrong.

Strongly disagree  
Moderately disagree  
Slightly disagree  
Slightly agree  
Moderately agree  
Strongly agree  
Doesn't want to disclose  
Doesn't know  
Missing

Men and women should each have different roles to play in society.

Strongly disagree  
Moderately disagree  
Slightly disagree  
Slightly agree  
Moderately agree  
Strongly agree  
Doesn't want to disclose  
Doesn't know  
Missing

I would call some acts wrong on the grounds that they are unnatural.

Strongly disagree  
Moderately disagree  
Slightly disagree  
Slightly agree  
Moderately agree  
Strongly agree  
Doesn't want to disclose  
Doesn't know  
Missing

I just have a few more questions to finish up.

First I would like to ask some questions about you and [child's name]'s other parent's education.  
What is the highest level of education you have successfully completed?

Secondary school not completed, no completed  
Professional education  
Completed 9 years of school, no further  
education  
Technical school or business school

1  
2  
3 Completed apprenticeship  
4 College  
5 Primary school teacher seminar  
6 Higher professional school  
7 Bachelor at University or applied university  
8 Master at University or applied university  
9 Doctorate at University or applied university  
10 Other  
11 Doesn't want to disclose  
12 Doesn't know  
13 Missing

14 And what about [child's name]'s father/mother? What is the highest level of education s/he has  
15 successfully completed?

16 Secondary school not completed, no completed  
17 Professional education  
18 Completed 9 years of school, no further  
19 education  
20 Technical school or business school  
21 Completed apprenticeship  
22 College  
23 Primary school teacher seminar  
24 Higher professional school  
25 Bachelor at University or applied university  
26 Master at University or applied university  
27 Doctorate at University or applied university  
28 Other  
29 Doesn't want to disclose  
30 Doesn't know  
31 Missing

32 Which of these descriptions apply to what you have been doing for the last seven days?

33 In paid work or away temporarily  
34 In education (even if on vacation)  
35 Unemployed and actively looking for a job  
36 Unemployed, wishes to work but doesn't actively look for a  
37 job  
38 Permanently sick or disabled  
39 Retired  
40 In community or military service  
41 Doing housework, looking after children or other  
42 persons  
43 Other  
44 Doesn't want to disclose  
45 Doesn't know  
46 Missing

47 Regardless of your basic or contracted hours, how many hours per week do you normally work,  
48 including any paid or unpaid overtime?

49 Hours

50 What is your current occupation?

- 1  
2  
3 Write-in response  
4 And what about [child's name]'s father/mother? Which describes his/her situation in the last seven days?  
5 In paid work or away temporarily  
6 In education (even if on vacation)  
7 Unemployed and actively looking for a job  
8 Unemployed, wishes to work but doesn't actively look for a  
9 job  
10 Permanently sick or disabled  
11 Retired  
12 In community or military service  
13 Doing housework, looking after children or other  
14 persons  
15 Other  
16 Doesn't want to disclose  
17 Doesn't know  
18 Missing  
19  
20 How many hours does s/he normally work, including any paid or unpaid overtime?  
21 Hours  
22 What is his/her current occupation?  
23 Write-in response  
24 In what range is your current annual household income?  
25 <20'000  
26 <40'000  
27 <60'000  
28 <80'000  
29 <100'000  
30 <120'000  
31 <150'000  
32 Min. 150'000  
33 Refuses answer  
34 Doesn't know  
35 Missing  
36  
37 Are you a citizen of Switzerland?  
38 Yes  
39 No  
40 Doesn't want to disclose  
41 Doesn't know  
42 Missing  
43  
44 What citizenship do you hold?  
45 Write-in response  
46 Were you born in Switzerland?  
47 Yes  
48 No  
49 Doesn't want to disclose  
50 Doesn't know  
51 Missing  
52  
53 In which country were you born?  
54 Write-in response  
55  
56  
57  
58  
59  
60



1  
2  
3  
4  
5  
6  
7  
8  
9  
10  
11  
12  
13  
14  
15  
16  
17  
18  
19  
20  
21  
22  
23  
24  
25  
26  
27  
28  
29  
30  
31  
32  
33  
34  
35  
36  
37  
38  
39  
40  
41  
42  
43  
44  
45  
46  
47  
48  
49  
50  
51  
52  
53  
54  
55  
56  
57  
58  
59  
60

What year did you first come to live in Switzerland?

Year

What languages do you speak most often at home?

Write-in response

Second language:

Write-in response

What language do you speak most often with your doctor?

Write-in response

What is your postcode?

Write-in response

Do you have comments you would like to make?

Write-in response

For peer review only

**Supplementary Table S1.** Satisfaction with and trust in primary biomedically- and CAM-oriented providers.

|                                                                                                        | <i>All parents</i><br>(N=1390)  | <i>By PACV-score</i>             |                              | <i>P value</i> |
|--------------------------------------------------------------------------------------------------------|---------------------------------|----------------------------------|------------------------------|----------------|
|                                                                                                        |                                 | <i>Non-VH parents</i><br>(N=889) | <i>VH parents</i><br>(N=501) |                |
|                                                                                                        | <i>N (%)</i>                    | <i>N (%)</i>                     | <i>N (%)</i>                 |                |
| <i>Type of primary provider</i>                                                                        |                                 |                                  |                              | <0.001         |
| <i>Biomedical</i>                                                                                      | 893 (64)                        | 705 (79)                         | 188 (38)                     |                |
| <i>CAM</i>                                                                                             | 490 (35)                        | 183 (21)                         | 307 (61)                     |                |
| <i>Missing</i>                                                                                         | 7 (1)                           | 1 (0)                            | 6 (1)                        |                |
| <i>Discussed vaccines with primary provider</i>                                                        |                                 |                                  |                              | <0.001         |
| <i>No</i>                                                                                              | 318 (23)                        | 238 (27)                         | 80 (16)                      |                |
| <i>Yes</i>                                                                                             | 1063 (76)                       | 645 (73)                         | 418 (83)                     |                |
| <i>Missing</i>                                                                                         | 9 (1)                           | 6 (1)                            | 3 (1)                        |                |
| <i>Parents who reported having discussed vaccination with primary provider</i>                         | <i>Total sample</i><br>(N=1063) | <i>By PACV-score</i>             |                              |                |
|                                                                                                        |                                 | <i>Non-VH parents</i><br>(N=645) | <i>VH parents</i><br>(N=418) |                |
|                                                                                                        | <i>N (%)</i>                    | <i>N (%)</i>                     | <i>N (%)</i>                 | <i>P value</i> |
| <i>Satisfied with provider<sup>1</sup></i>                                                             | 928 (87)                        | 586 (91)                         | 342 (82)                     | <0.001         |
| <i>Trust provider<sup>2</sup></i>                                                                      | 1000 (94)                       | 632 (98)                         | 368 (88)                     | <0.001         |
| <i>Provider's views are similar to parents<sup>2</sup></i>                                             | 838 (79)                        | 567 (88)                         | 271 (65)                     | <0.001         |
| <i>Parents who reported having discussed vaccination with biomedical primary provider</i>              | <i>Total sample</i><br>(N=656)  | <i>By PACV-score</i>             |                              |                |
|                                                                                                        |                                 | <i>Non-VH parents</i><br>(N=511) | <i>VH parents</i><br>(N=145) |                |
|                                                                                                        | <i>N (%)</i>                    | <i>N (%)</i>                     | <i>N (%)</i>                 | <i>P value</i> |
| <i>Satisfied with provider<sup>1</sup></i>                                                             | 567 (86)                        | 467 (91)                         | 100 (69)                     | <0.001         |
| <i>Trust provider<sup>2</sup></i>                                                                      | 623 (95)                        | 503 (98)                         | 120 (83)                     | <0.001         |
| <i>Provider's views are similar to parents<sup>2</sup></i>                                             | 528 (80)                        | 449 (88)                         | 79 (54)                      | <0.001         |
| <i>Parents who reported having discussed vaccination with CAM primary provider</i>                     | <i>Total sample</i><br>(N=400)  | <i>By PACV-score</i>             |                              |                |
|                                                                                                        |                                 | <i>Non-VH parents</i><br>(N=133) | <i>VH parents</i><br>(N=267) |                |
|                                                                                                        | <i>N (%)</i>                    | <i>N (%)</i>                     | <i>N (%)</i>                 | <i>P value</i> |
| <i>Satisfied with provider<sup>1</sup></i>                                                             | 355 (89)                        | 118 (89)                         | 237 (89)                     | 0.395          |
| <i>Trust provider<sup>2</sup></i>                                                                      | 371 (93)                        | 128 (96)                         | 243 (91)                     | 0.164          |
| <i>Provider's views are similar to parents<sup>2</sup></i>                                             | 305 (76)                        | 117 (88)                         | 188 (70)                     | 0.001          |
| <i>Parents reporting that primary providers' views are similar to their own<sup>2</sup></i>            | <i>Total sample</i><br>(N=838)  | <i>By PACV-score</i>             |                              |                |
|                                                                                                        |                                 | <i>Non-VH parents</i><br>(N=567) | <i>VH parents</i><br>(N=271) |                |
|                                                                                                        | <i>N (%)</i>                    | <i>N (%)</i>                     | <i>N (%)</i>                 | <i>P value</i> |
| <i>Satisfied with provider<sup>1</sup></i>                                                             | 774 (92)                        | 522 (92)                         | 252 (93)                     | 0.485          |
| <i>Trust provider<sup>2</sup></i>                                                                      | 820 (98)                        | 560 (99)                         | 260 (96)                     | 0.004          |
| <i>Parents reporting that biomedical primary providers' views are similar to their own<sup>2</sup></i> | <i>Total sample</i><br>(N=528)  | <i>By PACV-score</i>             |                              |                |
|                                                                                                        |                                 | <i>Non-VH parents</i><br>(N=449) | <i>VH parents</i><br>(N=79)  |                |
|                                                                                                        | <i>N (%)</i>                    | <i>N (%)</i>                     | <i>N (%)</i>                 | <i>P value</i> |
| <i>Satisfied with provider<sup>1</sup></i>                                                             | 479 (91)                        | 413 (92)                         | 66 (84)                      | 0.081          |
| <i>Trust provider<sup>2</sup></i>                                                                      | 518 (98)                        | 444 (99)                         | 74 (94)                      | <0.001         |
| <i>Parents reporting that CAM primary providers' views are similar to their own<sup>2</sup></i>        | <i>Total sample</i><br>(N=305)  | <i>By PACV-score</i>             |                              |                |
|                                                                                                        |                                 | <i>Non-VH parents</i><br>(N=117) | <i>VH parents</i><br>(N=188) |                |
|                                                                                                        | <i>N (%)</i>                    | <i>N (%)</i>                     | <i>N (%)</i>                 | <i>P value</i> |
| <i>Satisfied with provider<sup>1</sup></i>                                                             | 290 (95)                        | 108 (92)                         | 182 (97)                     | 0.141          |
| <i>Trust provider<sup>2</sup></i>                                                                      | 297 (97)                        | 115 (98)                         | 182 (97)                     | 0.516          |

**Note.** <sup>1</sup>Satisfied/very satisfied; <sup>2</sup>Somewhat or completely; Pearson's Chi-squared tests were used for statistical analysis.

1  
2  
3  
4  
5  
6  
7  
8  
9  
10  
11  
12  
13  
14  
15  
16  
17  
18  
19  
20  
21  
22  
23  
24  
25  
26  
27  
28  
29  
30  
31  
32  
33  
34  
35  
36  
37  
38  
39  
40  
41  
42  
43  
44  
45  
46  
47  
48  
49  
50  
51  
52  
53  
54  
55  
56  
57  
58  
59  
60STROBE Statement—Checklist of items that should be included in reports of *cross-sectional studies*

|                                               | Item No | Recommendation                                                                                                                                                                                                                                                                                                                             |
|-----------------------------------------------|---------|--------------------------------------------------------------------------------------------------------------------------------------------------------------------------------------------------------------------------------------------------------------------------------------------------------------------------------------------|
| <b>Title and abstract yes (p. 1-2)</b>        | 1       | (a) Indicate the study's design with a commonly used term in the title or the abstract<br>(b) Provide in the abstract an informative and balanced summary of what was done and what was found                                                                                                                                              |
| <b>Introduction</b>                           |         |                                                                                                                                                                                                                                                                                                                                            |
| Background/rationale <b>yes (p. 3-5)</b>      | 2       | Explain the scientific background and rationale for the investigation being reported                                                                                                                                                                                                                                                       |
| Objectives <b>yes (p. 5)</b>                  | 3       | State specific objectives, including any prespecified hypotheses                                                                                                                                                                                                                                                                           |
| <b>Methods</b>                                |         |                                                                                                                                                                                                                                                                                                                                            |
| Study design <b>yes (p. 6)</b>                | 4       | Present key elements of study design early in the paper                                                                                                                                                                                                                                                                                    |
| Setting <b>yes (p. 6)</b>                     | 5       | Describe the setting, locations, and relevant dates, including periods of recruitment, exposure, follow-up, and data collection                                                                                                                                                                                                            |
| Participants <b>yes (p. 6-7)</b>              | 6       | Give the eligibility criteria, and the sources and methods of selection of participants                                                                                                                                                                                                                                                    |
| Variables <b>yes (p. 6-8)</b>                 | 7       | Clearly define all outcomes, exposures, predictors, potential confounders, and effect modifiers. Give diagnostic criteria, if applicable                                                                                                                                                                                                   |
| Data sources/ measurement <b>yes (p. 7-8)</b> | 8*      | For each variable of interest, give sources of data and details of methods of assessment (measurement). Describe comparability of assessment methods if there is more than one group                                                                                                                                                       |
| Bias                                          | 9       | Describe any efforts to address potential sources of bias                                                                                                                                                                                                                                                                                  |
| Study size <b>yes (p. 8-9)</b>                | 10      | Explain how the study size was arrived at                                                                                                                                                                                                                                                                                                  |
| Quantitative variables <b>yes (p. 7)</b>      | 11      | Explain how quantitative variables were handled in the analyses. If applicable, describe which groupings were chosen and why                                                                                                                                                                                                               |
| Statistical methods <b>yes (p. 7)</b>         | 12      | (a) Describe all statistical methods, including those used to control for confounding<br>(b) Describe any methods used to examine subgroups and interactions<br>(c) Explain how missing data were addressed<br>(d) If applicable, describe analytical methods taking account of sampling strategy<br>(e) Describe any sensitivity analyses |
| <b>Results</b>                                |         |                                                                                                                                                                                                                                                                                                                                            |
| Participants <b>yes (p. 8-9)</b>              | 13*     | (a) Report numbers of individuals at each stage of study—eg numbers potentially eligible, examined for eligibility, confirmed eligible, included in the study, completing follow-up, and analysed<br>(b) Give reasons for non-participation at each stage<br>(c) Consider use of a flow diagram                                            |
| Descriptive data <b>yes (p. 8-9)</b>          | 14*     | (a) Give characteristics of study participants (eg demographic, clinical, social) and information on exposures and potential confounders<br>(b) Indicate number of participants with missing data for each variable of interest                                                                                                            |
| Outcome data                                  | 15*     | Report numbers of outcome events or summary measures                                                                                                                                                                                                                                                                                       |
| Main results <b>yes (p. 9-18)</b>             | 16      | (a) Give unadjusted estimates and, if applicable, confounder-adjusted estimates and their precision (eg, 95% confidence interval). Make clear which confounders were adjusted for and why they were included<br>(b) Report category boundaries when continuous variables were categorized                                                  |

(c) If relevant, consider translating estimates of relative risk into absolute risk for a meaningful time period

|                                           |    |                                                                                                                                                                            |
|-------------------------------------------|----|----------------------------------------------------------------------------------------------------------------------------------------------------------------------------|
| Other analyses                            | 17 | Report other analyses done—eg analyses of subgroups and interactions, and sensitivity analyses                                                                             |
| <b>Discussion</b>                         |    |                                                                                                                                                                            |
| Key results <b>yes (p. 18-19)</b>         | 18 | Summarise key results with reference to study objectives                                                                                                                   |
| Limitations <b>yes (p. 3)</b>             | 19 | Discuss limitations of the study, taking into account sources of potential bias or imprecision. Discuss both direction and magnitude of any potential bias                 |
| Interpretation <b>yes (18-20)</b>         | 20 | Give a cautious overall interpretation of results considering objectives, limitations, multiplicity of analyses, results from similar studies, and other relevant evidence |
| Generalisability <b>yes (p. 3, 19-20)</b> | 21 | Discuss the generalisability (external validity) of the study results                                                                                                      |
| <b>Other information</b>                  |    |                                                                                                                                                                            |
| Funding <b>yes (p. 20)</b>                | 22 | Give the source of funding and the role of the funders for the present study and, if applicable, for the original study on which the present article is based              |

\*Give information separately for exposed and unexposed groups.

**Note:** An Explanation and Elaboration article discusses each checklist item and gives methodological background and published examples of transparent reporting. The STROBE checklist is best used in conjunction with this article (freely available on the Web sites of PLoS Medicine at <http://www.plosmedicine.org/>, Annals of Internal Medicine at <http://www.annals.org/>, and Epidemiology at <http://www.epidem.com/>). Information on the STROBE Initiative is available at [www.strobe-statement.org](http://www.strobe-statement.org).
