# Supplementary material for: Parents’ vaccination information seeking, satisfaction with and trust in medical providers in Switzerland: a mixed-methods study
Source: PubMed Central journal article supplement — BMJ Open. 2022 Feb 28;12(2):e053267. doi: 10.1136/bmjopen-2021-053267 (PMC8886431; doi:10.1136/bmjopen-2021-053267), 2022-02-28
Supplement: bmjopen-2021-053267supp003.pdf [file bmjopen-2021-053267supp003.pdf]

## Quantitative questionnaire

Select the questionnaire

Childhood vaccination

HPV parent

HPV adolescent

Provider

Select the language

English

Français

Deutsch

Italiano

Date of the interview

Date

ID of interviewer

Identifying number

ID of questionnaire

Identifying number

ID of provider

Identifying number

Name of provider

Write-in response with provider's name

Name of respondent

Write-in response with respondent's name

Name of the target child

Write-in response with target child's/youth's name

Birthday of the target child

Date of birth of target child/youth

Is a copy of the vaccination card available to the study team?

Yes

Not yet available, but participant agreed to send it during recruitment

Card not available: do not vaccinate

Card not available: lost vaccination card

Card not available: child too young

Card not available: other reason

Participant does not want to share the card

No answer

Consent form available

Yes

No

Is the relevant person available?

Yes, target person is already on the phone and ready for interview

Another situation...

Please describe why the person is not available and what are the next steps

Write-in response with why the person is not available and what are the next steps

What is the sex of [child's name]?

Boy

Girl

Intersex

Doesn't want to disclose

Is Dr. [primary providers's name] [child's name]'s doctor?

Yes

No

Unclear

Right person identified, interview can start

Interview started

Language problems

Person refused

Interviewee incapacitated

Other

The interview cannot take place as not all identification or selection criteria are met. I would like to thank you very much for your time.

In order to obtain more background about you and your practices, could you please tell me if you are a licensed medical doctor in Switzerland?

Yes

No

Missing

Have you undertaken any additional specialist training in any discipline of complementary and/or alternative medicine?

Yes

No

Missing

Which ones?

Anthroposophic medicine

Traditional Chinese Medicine / Acupuncture

Homeopathic medicine

Phytotherapy (i.e. plant-based/herbal remedies)

Other(s)

No answer

Ok. Thank you. Do you provide any complementary or alternative medicines to your patients?

No

Yes

Missing

Which ones?

Anthroposophic medicine

Traditional Chinese Medicine / Acupuncture

Homeopathic medicine

Phytotherapy (i.e. plant-based/herbal remedies)

Other(s)

No answer

Anthroposophic medicine

No

Yes

Traditional Chinese Medicine / Acupuncture

No

Yes

Homeopathic medicine

- No
- Yes

Phytotherapy (i.e. plant-based/herbal remedies)

- No
- Yes

Other(s)

- No
- Yes

No answer

- No
- Yes

You live in a household with X people. How would you describe the household you live in. Is it...

Household of a couple with 1 or more children  
Household of a single parent with 1 or more children

Household of people who are not related at all  
Household where some of the people are related

Household of people who are all related

Doesn't want to disclose

Doesn't know

Missing

Could you please tell me about the people who live in your home, yourself included?

First yourself [person 1], what is your age?

Age

Person 1, sex

Male

Female

Other/not disclosed

Missing

How are you related to [child's name]?

Mother

Step-mother

Mother/father's partner

Sister or half-sister

Step-sister

Grand-mother

Aunt, cousin

Other relative

Not a relative

Doesn't want to disclose

Doesn't know

Missing

How are you related to [child's name]?

Father

Step-father

Mother/father's partner

Brother or half-brother

Step-brother  
Grand-father  
Uncle, cousin  
Other relative  
Not a relative  
Doesn't want to disclose  
Doesn't know  
Missing

Besides you and [child's name], who else lives in your household?  
Indicates that another person lives in household  
Indicates that NO other person lives in household  
Doesn't want to say  
Missing

Person 2, age  
[Same as above]

Person 2, sex  
[Same as above]

How is she related to [child's name]?  
[Same as above]

How is he related to [child's name]?  
[Same as above]

Does someone else live in your household?  
[Same as above]

Person 3, age  
[Same as above]

Person 3, sex  
[Same as above]

How is she related to [child's name]?  
[Same as above]

How is he related to [child's name]?  
[Same as above]

Do you have children?  
Yes  
No  
Doesn't want to disclose  
Doesn't know  
Missing

How many?  
Number of children

Do you have any children who do not live at home?  
Yes  
No  
Doesn't want to disclose  
Doesn't know  
Missing

How many?  
Number of children

How would you describe the household you live in. Is it...

Household of couple without children  
Household of a couple with 1 or more children  
Household of a single parent with 1 or more children  
Household of people who are not related at all  
Household where some of the people are related  
Household of people who are all related  
doesn't want to disclose  
doesn't know  
missing

Have you ever delayed [child's name]'s vaccination for reasons other than illness or allergy?

Yes  
No  
Doesn't want to disclose  
Doesn't know  
Missing

Have you ever refused [child's name]'s vaccination for reasons other than illness or allergy?

Yes  
No  
Doesn't want to disclose  
Doesn't know  
Missing

On a scale from 0 to 10, with 0 being not sure at all and 10 being completely sure, How sure are you that following the recommended vaccine schedule is a good idea for [child's name]?

0 - 10

I will rephrase the question: On a scale from 0 to 10, with 0 being not sure at all and 10 being completely sure, how sure are you that it is a good idea to vaccinate [child's name] with the vaccines recommended by the Federal Office of Public Health?

0 - 10

Do you agree or disagree with the following statements:

It is my role as a parent to question shots.

Strongly agree  
Sgree  
Not sure  
Disagree  
Strongly disagree  
Doesn't want to disclose  
Missing

I believe that many of the illnesses that vaccines prevent are severe.

Strongly agree  
Sgree  
Not sure  
Disagree  
Strongly disagree  
Doesn't want to disclose  
Missing

It is better for [child's name] to develop immunity by getting sick than to get a vaccine.

Strongly agree

Sgree

Not sure

Disagree

Strongly disagree

Doesn't want to disclose

Missing

It's better for [child's name] to get fewer vaccines at the same time.

Strongly agree

Sgree

Not sure

Disagree

Strongly disagree

Doesn't want to disclose

Missing

How concerned are you that [child's name] might have a serious side effect from a vaccine?

Not at all concerned

Not too concerned

Not sure

Somewhat concerned

Very concerned

Doesn't want to disclose

Missing

How concerned are you that one of the vaccines might not be safe?

Not at all concerned

Not too concerned

Not sure

Somewhat concerned

Very concerned

Doesn't want to disclose

Missing

How concerned are you that vaccines might not prevent disease?

Not at all concerned

Not too concerned

Not sure

Somewhat concerned

Very concerned

Doesn't want to disclose

Missing

If you had another child today, would you want him/her to get all the recommended vaccines?

Yes

No

Doesn't want to disclose

Doesn't know

Missing

Overall, how hesitant about vaccinations would you consider yourself to be?

Not at all hesitant

Not too hesitant

Not sure

Somewhat hesitant

Very hesitant

doesn't want to disclose

missing

Do you agree or disagree with the following statements:

I educate parents of children in my practice about the importance of immunizations.

Strongly agree

Sgree

Not sure

Disagree

Strongly disagree

Doesn't want to disclose

Missing

I monitor whether or not children I see are up to date on their immunizations.

Strongly agree

Sgree

Not sure

Disagree

Strongly disagree

Doesn't want to disclose

Missing

I trust the information I receive about vaccinations .

Strongly agree

Sgree

Not sure

Disagree

Strongly disagree

Doesn't want to disclose

Missing

I am able to openly discuss my concerns about vaccines with my child's doctor.

Strongly agree

Sgree

Not sure

Disagree

Strongly disagree

Doesn't want to disclose

Missing

All things considered, how much do you trust your child's doctor, on a scale from 0 to 10, with 0 being not at all and 10 being completely?

0 - 10

Have you ever discussed [child's name]'s vaccination with [provider's name]?

Yes

No

Doesn't want to disclose

Doesn't know

Missing

How strongly does [provider's name] recommend vaccinating [child's name] with all the recommended vaccines?

Supports all recommended vaccines

Supports most recommended vaccines

Supports some recommended vaccines

Doesn't support any recommended vaccines

Doesn't want to disclose

Doesn't know

Missing

How important is following the recommended vaccination schedule for [provider's name]?

Very important

Somewhat important

Not very important

Not important at all

Doesn't want to disclose

Doesn't know

Missing

How much do you trust the information [provider's name] gave you?

Completely trust

Somewhat trust

Neither trust nor distrust

Somewhat distrust

Don't trust at all

Doesn't want to disclose

Doesn't know

Missing

How satisfied were you with your discussions about vaccines with [provider's name]?

Not at all satisfied

Somewhat satisfied

Neither satisfied nor unsatisfied

Satisfied

Very satisfied

Doesn't want to disclose

Doesn't know

Missing

Please indicate how much you agree with the following statements:

I am able to ask [provider's name] questions about vaccination.

Completely agree



Somewhat agree  
Neither agree nor disagree  
Somewhat disagree  
Completely disagree  
Doesn't want to disclose  
Doesn't know  
Missing

[Provider's name] takes the time needed to discuss my concerns about vaccination with me.

Completely agree  
Somewhat agree  
Neither agree nor disagree  
Somewhat disagree  
Completely disagree  
Doesn't want to disclose  
Doesn't know  
Missing

[Provider's name] takes my concerns about vaccination seriously.

Completely agree  
Somewhat agree  
Neither agree nor disagree  
Somewhat disagree  
Completely disagree  
Doesn't want to disclose  
Doesn't know  
Missing

[Provider's name]'s views on vaccination are similar to my own.

Completely agree  
Somewhat agree  
Neither agree nor disagree  
Somewhat disagree  
Completely disagree  
Doesn't want to disclose  
Doesn't know  
Missing

Have you discussed vaccination for [child's name] with any other doctor?

Yes  
No  
Doesn't want to disclose  
Doesn't know  
Missing

What led you to consult another doctor?

Second opinion  
Moved  
Former provider stopped working

Disagreement with provider

Other: \_\_\_\_\_

Doesn't want to disclose

Doesn't know

Missing

How satisfied were you with your discussions about [child's name]'s vaccines with that doctor?

Not at all satisfied

Somewhat satisfied

Neither satisfied nor unsatisfied

Satisfied

Very satisfied

Doesn't want to disclose

Doesn't know

Missing

How much do you trust the information that doctor gave you about vaccines?

Completely trust

Somewhat trust

Neither trust nor distrust

Somewhat distrust

Don't trust at all

Doesn't want to disclose

Doesn't know

Missing

What are your most trusted information sources on vaccination?

No information/no source

Family

My child's doctor

Other doctor

Friends and acquaintances

Public health authorities

TV

Internet

Social media (such as Facebook, Instagram and Twitter)

Print media (such as books, magazines and newspapers)

Other: \_\_\_\_\_

Doesn't want to disclose

Doesn't know

Missing

Which TV programs?

Write-in response

Which websites?

Write-in response

What social media?

Write-in response

What print media?

Write-in response  
What other sources?

Write-in response  
Did you apply the information you received when making decisions about vaccination for your child?

Yes

No

Doesn't want to disclose

Doesn't know

Missing

Please indicate how much you agree with the following statements:

I can always prevent my child from being infected with vaccine-preventable diseases by other means than vaccination.

Completely agree

Somewhat agree

Neither agree nor disagree

Somewhat disagree

Completely disagree

Doesn't want to disclose

Doesn't know

Missing

Vaccine-preventable diseases can be easily cured in Switzerland.

Completely agree

Somewhat agree

Neither agree nor disagree

Somewhat disagree

Completely disagree

Doesn't want to disclose

Doesn't know

Missing

Vaccines can cause serious long-term harm to health.

Completely agree

Somewhat agree

Neither agree nor disagree

Somewhat disagree

Completely disagree

Doesn't want to disclose

Doesn't know

Missing

Vaccination is unnatural, so it is best to vaccinate as little as possible.

Completely agree

Somewhat agree

Neither agree nor disagree

Somewhat disagree

Completely disagree

Doesn't want to disclose

Doesn't know

Missing

How likely do you think it is that your child will be exposed to vaccine-preventable diseases in your home?

Very likely

Somewhat likely

Not sure

Somewhat unlikely

Very unlikely

Doesn't want to disclose

Doesn't know

Missing

How likely do you think it is that your child will be exposed to vaccine-preventable diseases in your community?

Very likely

Somewhat likely

Not sure

Somewhat unlikely

Very unlikely

Doesn't want to disclose

Doesn't know

Missing

About how many of your family members with children do you think have vaccinated their children?

Almost all

About three-quarters

About half

About a quarter

Almost none

Doesn't want to disclose

Doesn't know

Missing

About how many of your friends with children do you think have vaccinated their children?

Almost all

About three-quarters

About half

About a quarter

Almost none

Doesn't want to disclose

Doesn't know

Missing

About how many of the children in your community do you think are vaccinated?

Almost all

About three-quarters

About half

About a quarter

Almost none  
Doesn't want to disclose  
Doesn't know  
Missing

Now I would like to ask you some questions about health more generally.

How is your child's health, in general?

Very good  
Good  
OK  
Bad  
Very bad  
Doesn't want to disclose  
Doesn't know  
Missing

Do you agree or disagree with the following statements:

It is my responsibility as a parent to actively research health decisions for my child

Strongly agree  
Agree  
Neither agree nor disagree  
Disagree  
Strongly disagree  
Doesn't want to disclose  
Doesn't know  
Missing

I took an active role in choosing my child's doctor.

Strongly agree  
Agree  
Neither agree nor disagree  
Disagree  
Strongly disagree  
Doesn't want to disclose  
Doesn't know  
Missing

I chose a doctor for my child who shares my views on health.

Strongly agree  
Agree  
Neither agree nor disagree  
Disagree  
Strongly disagree  
Doesn't want to disclose  
Doesn't know  
Missing

If I disagree or am uncertain about the advice of a nurse or a doctor, I am comfortable saying so.

Strongly agree

Agree  
Neither agree nor disagree  
Disagree  
Strongly disagree  
Doesn't want to disclose  
Doesn't know  
Missing

How many of the recommended well-child visits from birth until now has your child completed?

All recommended visits  
Some but maybe not all recommended visits  
None of them  
Doesn't want to disclose  
Doesn't know  
Missing

When [child's name] was an infant (0-2 years old), which of the following childcare options did you use? Please indicate all that apply.

I (or my partner) stayed home with him/her.  
Other family cared for him/her.  
A nanny cared for him/her in my home.  
He/she attended a small, home-based day care.  
He/she attended private day care.  
He/she attended public day care.  
Other  
Doesn't want to disclose  
Doesn't know  
Missing

And how old was he/she when he/she started day care?

Age

I will now list some activities. Please indicate which of these descriptions applies to what you did when [child's name] was an infant (0-2 years old)? Please indicate all that apply

In paid work  
In education (even if on vacation)  
Unemployed and actively looking for a job  
Unemployed, wished to work but didn't actively look for a job  
Permanently sick or disabled  
Retired  
In community or military service  
Doing housework, looking after children or other persons  
Other  
Doesn't want to disclose  
Doesn't know  
Missing

What were your total 'basic' or contracted hours each week (in your main job), excluding any paid and unpaid overtime?

Hours

How is your health in general? Is it...

- Very good
- Good
- OK
- Bad
- Very bad
- Doesn't want to disclose
- Doesn't know
- Missing

How important is health for you? Here are three options, please tell us which one is closest to your own opinion.

- I live without worrying too much about consequences for my health.
- My lifestyle is influenced by considerations about maintaining my health.
- Considerations about my health have a large impact on how I live.
- Doesn't want to disclose
- Doesn't know
- Missing

In the last 12 months, that is since [month, year], which of the following treatments have you used for your own health? Please indicate yes or no for each.

- Acupressure
- Acupuncture
- Anthroposophical medicine
- Chinese medicine
- Chiropractics
- Herbal treatment
- Homeopathy
- Hypnotherapy
- Massage therapy
- Osteopathy
- Physiotherapy
- Reflexology
- Spiritual Healing
- Other: \_\_\_\_\_
- None of these
- Don't know

*The following questions have been posed to your patients who participated in this study. We would now like to pose the same questions to you. This will help us to better understand the factors that play a role when patients choose their providers.*

Now I would like to ask you some questions about other topics to get a sense of your core worldview and political and religious sentiments.

Do you consider yourself as belonging to any particular religion or denomination?

- Yes
- No
- Doesn't want to disclose
- Doesn't know

Missing

Which one?

Christian: \_\_\_\_\_

Jewish: \_\_\_\_\_

Islamic: \_\_\_\_\_

Eastern religions: \_\_\_\_\_

Other non-Christian religions: \_\_\_\_\_

Doesn't want to disclose

Doesn't know

Missing

Please specify which exactly:

Write-in response

Apart from special occasions such as weddings and funerals, about how often do you attend religious services nowadays?

Every day

More than once a week

Once a week

At least once a month

Only on special holy days

Less often

Never

Doesn't want to disclose

Doesn't know

Missing

Regardless of whether you belong to a particular religion, how religious would you say you are?

Not at all religious

Somewhat religious

Religious

Very religious

Doesn't want to disclose

Doesn't know

Missing

How important do you consider spiritual experiences to be in your everyday life?

Very important

Somewhat important

Not very important

Not important at all

Not sure

Doesn't want to disclose

Doesn't know

Missing

How interested would you say you are in politics? Are you...

Very interested

Quite interested

Hardly interested



Or, not at all interested?

Doesn't want to disclose

Doesn't know

Missing

Is there a particular political party that you feel closer to than all the other political parties?

Yes

No

Doesn't want to disclose

Doesn't know

Missing

Which one?

Write-in response

In politics, people sometimes talk of "left" and "right". Where would you place yourself? Would you consider yourself...

Left

Center left

Center

Center right

Right

Doesn't want to disclose

Doesn't know

Missing

How often do you participate in activities with a society, a club, a political party, a cultural association, or other groups, including religious groups?

Almost every day

About once a week

About 1-3 times a month

A few times a year

More rarely

Never

Doesn't want to disclose

Doesn't know

Missing

We would now like to pose some questions regarding the values that generally guide people in their everyday life. The questions don't directly relate to vaccinations.

When you decide whether something is right or wrong, to what extent are the following considerations relevant to your thinking?

Whether or not someone suffered emotionally. Is it not at all relevant, not very relevant, slightly relevant, somewhat relevant, very relevant or extremely relevant?

Not at all relevant

Not very relevant

Slightly relevant

Somewhat relevant

Very relevant

Extremely relevant

Doesn't want to disclose

Doesn't know

Missing

Whether or not someone was treated differently than others.

Not at all relevant

Not very relevant

Slightly relevant

Somewhat relevant

Very relevant

Extremely relevant

Doesn't want to disclose

Doesn't know

Missing

Whether or not someone's actions showed love for his or her country.

Not at all relevant

Not very relevant

Slightly relevant

Somewhat relevant

Very relevant

Extremely relevant

Doesn't want to disclose

Doesn't know

Missing

Whether or not someone's actions showed a lack of respect for authority.

Not at all relevant

Not very relevant

Slightly relevant

Somewhat relevant

Very relevant

Extremely relevant

Doesn't want to disclose

Doesn't know

Missing

Whether or not someone violated standards of purity and decency.

Not at all relevant

Not very relevant

Slightly relevant

Somewhat relevant

Very relevant

Extremely relevant

Doesn't want to disclose

Doesn't know

Missing

Whether or not someone was good at math.

Not at all relevant

Not very relevant

Slightly relevant  
Somewhat relevant  
Very relevant  
Extremely relevant  
Doesn't want to disclose  
Doesn't know  
Missing

Whether or not someone cared for someone weak or vulnerable.

Not at all relevant  
Not very relevant  
Slightly relevant  
Somewhat relevant  
Very relevant  
Extremely relevant  
Doesn't want to disclose  
Doesn't know  
Missing

Whether or not someone acted unfairly.

Not at all relevant  
Not very relevant  
Slightly relevant  
Somewhat relevant  
Very relevant  
Extremely relevant  
Doesn't want to disclose  
Doesn't know  
Missing

Whether or not someone did something to betray his or her group.

Not at all relevant  
Not very relevant  
Slightly relevant  
Somewhat relevant  
Very relevant  
Extremely relevant  
Doesn't want to disclose  
Doesn't know  
Missing

Whether or not someone conformed to the traditions of society.

Not at all relevant  
Not very relevant  
Slightly relevant  
Somewhat relevant  
Very relevant  
Extremely relevant

Doesn't want to disclose

Doesn't know

Missing

Whether or not someone did something disgusting.

Not at all relevant

Not very relevant

Slightly relevant

Somewhat relevant

Very relevant

Extremely relevant

Doesn't want to disclose

Doesn't know

Missing

Please listen to the following statements and indicate whether you strongly disagree, moderately disagree, slightly disagree, slightly agree, moderately agree or strongly agree

Compassion for those who are suffering is the most crucial virtue.

Strongly disagree

Moderately disagree

Slightly disagree

Slightly agree

Moderately agree

Strongly agree

Doesn't want to disclose

Doesn't know

Missing

When the government makes laws, the number one principle should be ensuring that everyone is treated fairly.

Strongly disagree

Moderately disagree

Slightly disagree

Slightly agree

Moderately agree

Strongly agree

Doesn't want to disclose

Doesn't know

Missing

I am proud of my country's history.

Strongly disagree

Moderately disagree

Slightly disagree

Slightly agree

Moderately agree

Strongly agree

Doesn't want to disclose

Doesn't know

Missing

Respect for authority is something all children need to learn.

Strongly disagree

Moderately disagree

Slightly disagree

Slightly agree

Moderately agree

Strongly agree

Doesn't want to disclose

Doesn't know

Missing

People should not do things that are disgusting even if no one is harmed.

Strongly disagree

Moderately disagree

Slightly disagree

Slightly agree

Moderately agree

Strongly agree

Doesn't want to disclose

Doesn't know

Missing

It is better to do good than to do bad.

Strongly disagree

Moderately disagree

Slightly disagree

Slightly agree

Moderately agree

Strongly agree

Doesn't want to disclose

Doesn't know

Missing

One of the worst things a person could do is hurt a defenseless animal.

Strongly disagree

Moderately disagree

Slightly disagree

Slightly agree

Moderately agree

Strongly agree

Doesn't want to disclose

Doesn't know

Missing

Justice is the most important requirement for a society.

Strongly disagree

Moderately disagree

Slightly disagree  
Slightly agree  
Moderately agree  
Strongly agree  
Doesn't want to disclose  
Doesn't know  
Missing

People should be loyal to their family members even when they have done something wrong.

Strongly disagree  
Moderately disagree  
Slightly disagree  
Slightly agree  
Moderately agree  
Strongly agree  
Doesn't want to disclose  
Doesn't know  
Missing

Men and women should each have different roles to play in society.

Strongly disagree  
Moderately disagree  
Slightly disagree  
Slightly agree  
Moderately agree  
Strongly agree  
Doesn't want to disclose  
Doesn't know  
Missing

I would call some acts wrong on the grounds that they are unnatural.

Strongly disagree  
Moderately disagree  
Slightly disagree  
Slightly agree  
Moderately agree  
Strongly agree  
Doesn't want to disclose  
Doesn't know  
Missing

I just have a few more questions to finish up.

First I would like to ask some questions about you and [child's name]'s other parent's education.  
What is the highest level of education you have successfully completed?

Secondary school not completed, no completed  
Professional education  
Completed 9 years of school, no further  
education  
Technical school or business school

Completed apprenticeship  
College  
Primary school teacher seminar  
Higher professional school  
Bachelor at University or applied university  
Master at University or applied university  
Doctorate at University or applied university  
Other  
Doesn't want to disclose  
Doesn't know  
Missing

And what about [child's name]'s father/mother? What is the highest level of education s/he has successfully completed?

Secondary school not completed, no completed  
Professional education  
Completed 9 years of school, no further education  
Technical school or business school  
Completed apprenticeship  
College  
Primary school teacher seminar  
Higher professional school  
Bachelor at University or applied university  
Master at University or applied university  
Doctorate at University or applied university  
Other  
Doesn't want to disclose  
Doesn't know  
Missing

Which of these descriptions apply to what you have been doing for the last seven days?

In paid work or away temporarily  
In education (even if on vacation)  
Unemployed and actively looking for a job  
Unemployed, wishes to work but doesn't actively look for a job  
Permanently sick or disabled  
Retired  
In community or military service  
Doing housework, looking after children or other persons  
Other  
Doesn't want to disclose  
Doesn't know  
Missing

Regardless of your basic or contracted hours, how many hours per week do you normally work, including any paid or unpaid overtime?

Hours

What is your current occupation?

Write-in response

And what about [child's name]'s father/mother? Which describes his/her situation in the last seven days?

In paid work or away temporarily

In education (even if on vacation)

Unemployed and actively looking for a job

Unemployed, wishes to work but doesn't actively look for a job

Permanently sick or disabled

Retired

In community or military service

Doing housework, looking after children or other persons

Other

Doesn't want to disclose

Doesn't know

Missing

How many hours does s/he normally work, including any paid or unpaid overtime?

Hours

What is his/her current occupation?

Write-in response

In what range is your current annual household income?

<20'000

<40'000

<60'000

<80'000

<100'000

<120'000

<150'000

Min. 150'000

Refuses answer

Doesn't know

Missing

Are you a citizen of Switzerland?

Yes

No

Doesn't want to disclose

Doesn't know

Missing

What citizenship do you hold?

Write-in response

Were you born in Switzerland?

Yes

No

Doesn't want to disclose

Doesn't know

Missing

In which country were you born?

Write-in response



What year did you first come to live in Switzerland?

Year

What languages do you speak most often at home?

Write-in response

Second language:

Write-in response

What language do you speak most often with your doctor?

Write-in response

What is your postcode?

Write-in response

Do you have comments you would like to make?

Write-in response
