# Supplementary material for: Parents’ vaccination information seeking, satisfaction with and trust in medical providers in Switzerland: a mixed-methods study
Source: HighWire-hosted journal article supplement (doi:10.1136/bmjopen-2021-053267), 2022-02-01
Supplement: bmjopen-2021-053267supp004_data_supplement.pdf [file bmjopen-2021-053267supp004_data_supplement.pdf]

**Supplementary Table S1.** Satisfaction with and trust in primary biomedically- and CAM-oriented providers.

|                                                                                                        | All parents<br>(N=1390)  | By PACV-score             |                       | P value |
|--------------------------------------------------------------------------------------------------------|--------------------------|---------------------------|-----------------------|---------|
|                                                                                                        |                          | Non-VH parents<br>(N=889) | VH parents<br>(N=501) |         |
|                                                                                                        | N (%)                    | N (%)                     | N (%)                 |         |
| <i>Type of primary provider</i>                                                                        |                          |                           |                       | <0.001  |
| Biomedical                                                                                             | 893 (64)                 | 705 (79)                  | 188 (38)              |         |
| CAM                                                                                                    | 490 (35)                 | 183 (21)                  | 307 (61)              |         |
| Missing                                                                                                | 7 (1)                    | 1 (0)                     | 6 (1)                 |         |
| <i>Discussed vaccines with primary provider</i>                                                        |                          |                           |                       | <0.001  |
| No                                                                                                     | 318 (23)                 | 238 (27)                  | 80 (16)               |         |
| Yes                                                                                                    | 1063 (76)                | 645 (73)                  | 418 (83)              |         |
| Missing                                                                                                | 9 (1)                    | 6 (1)                     | 3 (1)                 |         |
| <i>Parents who reported having discussed vaccination with primary provider</i>                         | Total sample<br>(N=1063) | By PACV-score             |                       |         |
|                                                                                                        |                          | Non-VH parents<br>(N=645) | VH parents<br>(N=418) |         |
|                                                                                                        | N (%)                    | N (%)                     | N (%)                 | P value |
| Satisfied with provider <sup>1</sup>                                                                   | 928 (87)                 | 586 (91)                  | 342 (82)              | <0.001  |
| Trust provider <sup>2</sup>                                                                            | 1000 (94)                | 632 (98)                  | 368 (88)              | <0.001  |
| Provider's views are similar to parents <sup>2</sup>                                                   | 838 (79)                 | 567 (88)                  | 271 (65)              | <0.001  |
| <i>Parents who reported having discussed vaccination with biomedical primary provider</i>              | Total sample<br>(N=656)  | By PACV-score             |                       |         |
|                                                                                                        |                          | Non-VH parents<br>(N=511) | VH parents<br>(N=145) |         |
|                                                                                                        | N (%)                    | N (%)                     | N (%)                 | P value |
| Satisfied with provider <sup>1</sup>                                                                   | 567 (86)                 | 467 (91)                  | 100 (69)              | <0.001  |
| Trust provider <sup>2</sup>                                                                            | 623 (95)                 | 503 (98)                  | 120 (83)              | <0.001  |
| Provider's views are similar to parents <sup>2</sup>                                                   | 528 (80)                 | 449 (88)                  | 79 (54)               | <0.001  |
| <i>Parents who reported having discussed vaccination with CAM primary provider</i>                     | Total sample<br>(N=400)  | By PACV-score             |                       |         |
|                                                                                                        |                          | Non-VH parents<br>(N=133) | VH parents<br>(N=267) |         |
|                                                                                                        | N (%)                    | N (%)                     | N (%)                 | P value |
| Satisfied with provider <sup>1</sup>                                                                   | 355 (89)                 | 118 (89)                  | 237 (89)              | 0.395   |
| Trust provider <sup>2</sup>                                                                            | 371 (93)                 | 128 (96)                  | 243 (91)              | 0.164   |
| Provider's views are similar to parents <sup>2</sup>                                                   | 305 (76)                 | 117 (88)                  | 188 (70)              | 0.001   |
| <i>Parents reporting that primary providers' views are similar to their own<sup>2</sup></i>            | Total sample<br>(N=838)  | By PACV-score             |                       |         |
|                                                                                                        |                          | Non-VH parents<br>(N=567) | VH parents<br>(N=271) |         |
|                                                                                                        | N (%)                    | N (%)                     | N (%)                 | P value |
| Satisfied with provider <sup>1</sup>                                                                   | 774 (92)                 | 522 (92)                  | 252 (93)              | 0.485   |
| Trust provider <sup>2</sup>                                                                            | 820 (98)                 | 560 (99)                  | 260 (96)              | 0.004   |
| <i>Parents reporting that biomedical primary providers' views are similar to their own<sup>2</sup></i> | Total sample<br>(N=528)  | By PACV-score             |                       |         |
|                                                                                                        |                          | Non-VH parents<br>(N=449) | VH parents<br>(N=79)  |         |
|                                                                                                        | N (%)                    | N (%)                     | N (%)                 | P value |
| Satisfied with provider <sup>1</sup>                                                                   | 479 (91)                 | 413 (92)                  | 66 (84)               | 0.081   |
| Trust provider <sup>2</sup>                                                                            | 518 (98)                 | 444 (99)                  | 74 (94)               | <0.001  |
| <i>Parents reporting that CAM primary providers' views are similar to their own<sup>2</sup></i>        | Total sample<br>(N=305)  | By PACV-score             |                       |         |
|                                                                                                        |                          | Non-VH parents<br>(N=117) | VH parents<br>(N=188) |         |
|                                                                                                        | N (%)                    | N (%)                     | N (%)                 | P value |
| Satisfied with provider <sup>1</sup>                                                                   | 290 (95)                 | 108 (92)                  | 182 (97)              | 0.141   |
| Trust provider <sup>2</sup>                                                                            | 297 (97)                 | 115 (98)                  | 182 (97)              | 0.516   |

**Note.** <sup>1</sup>Satisfied/very satisfied; <sup>2</sup>Somewhat or completely; Pearson's Chi-squared tests were used for statistical analysis.
